# Supplementary material for: Hepialiamides A–C: Aminated Fusaric Acid Derivatives and Related Metabolites with Anti-Inflammatory Activity from the Deep-Sea-Derived Fungus Samsoniella hepiali W7
Source: MDPI journal article supplement (doi:10.3390/md21110596), 2023-11-16
Supplement: s1 [file s1]

# Supporting Information

## Hepialiamides A–C: Aminated Fusaric Acid Derivatives and Related Metabolites with Anti-Inflammatory Activity from the Deep-Sea-Derived Fungus *Samsoniella hepiali* W7

Zheng-Biao Zou <sup>1,2,†</sup>, Tai-Zong Wu <sup>2,†</sup>, Long-He Yang<sup>3</sup>, Xi-Wen He<sup>3</sup>, Wen-Ya Liu<sup>1</sup>, Kai Zhang<sup>2</sup>, Chun-Lan Xie<sup>2</sup>, Ming-Min Xie<sup>2</sup>, Yong Zhang<sup>2</sup>, Xian-Wen Yang<sup>2,\*</sup> and Jun-Song Wang<sup>1,\*</sup>

1 Center for Molecular Metabolism, School of Environmental and Biological Engineering, Nanjing University of Science and Technology, 200 Xiaolingwei Street, Nanjing 210094, China; zhengbiaozou@njjust.edu.cn (Z.-B.Z.); wenyaliu2015@163.com (W.-Y.L.)

2 Key Laboratory of Marine Genetic Resources, Third Institute of Oceanography, Ministry of Natural Resources, 184 Daxue Road, Xiamen 361005, China; wutaizong@tio.org.cn (T.-Z.W.); z18252730063@163.com (K. Z.); xiechunlanxx@163.com (C.-L.X.); xiemingmin@tio.org.cn (M.-M.X.); zhangyong@tio.org.cn (Y. Z.)

3 Technical Innovation Center for Utilization of Marine Biological Resources, Third Institute of Oceanography, Ministry of Natural Resources, 184 Daxue Road, Xiamen 361005, China; longheyang@tio.org.cn (L.-H.Y.);

\* Correspondence: wang.junsong@gmail.com (J.W.); yangxianwen@tio.org.cn (X.-W.Y.); Tel.: +86-25- 8431-5512 (J.W.); Tel.: +86-592-2195319 (X.-W.Y.)

† These authors contributed equally to this work.

### Content

**Figure S1.** <sup>1</sup>H NMR spectrum of compound **1** in DMSO.

**Figure S2.** <sup>13</sup>C NMR spectrum of compound **1** in DMSO.

**Figure S3.** HSQC spectrum of compound **1** in DMSO.

**Figure S4.** <sup>1</sup>H–<sup>1</sup>H COSY spectrum of compound **1** in DMSO.

**Figure S5.** HMBC spectrum of compound **1** in DMSO.

**Figure S6.** NOESY spectrum of compound **1** in DMSO.

**Figure S7.** HRESIMS spectrum of compound **1**.

**Figure S8.** <sup>1</sup>H NMR spectrum of compound **2** in CD<sub>3</sub>OD.

**Figure S9.** <sup>13</sup>C NMR spectrum of compound **2** in CD<sub>3</sub>OD.

**Figure S10.** HSQC spectrum of compound **2** in CD<sub>3</sub>OD.

**Figure S11.** <sup>1</sup>H–<sup>1</sup>H COSY spectrum of compound **2** in CD<sub>3</sub>OD.

**Figure S12.** HMBC spectrum of compound **2** in CD<sub>3</sub>OD.

- Figure S13.** NOESY spectrum of compound **2** in CD<sub>3</sub>OD.
- Figure S14.** HRESIMS spectrum of compound **2**.
- Figure S15.** <sup>1</sup>H NMR spectrum of compound **3** in DMSO.
- Figure S16.** <sup>13</sup>C NMR spectrum of compound **3** in DMSO.
- Figure S17.** HSQC spectrum of compound **3** in DMSO.
- Figure S18.** <sup>1</sup>H–<sup>1</sup>H COSY spectrum of compound **3** in DMSO.
- Figure S19.** HMBC spectrum of compound **3** in DMSO.
- Figure S20.** NOESY spectrum of compound **3** in DMSO.
- Figure S21.** HRESIMS spectrum of compound **3**.
- Figure S22.** <sup>1</sup>H NMR spectrum of compound **4** in DMSO.
- Figure S23.** <sup>13</sup>C NMR spectrum of compound **4** in DMSO.
- Figure S24.** HSQC spectrum of compound **4** in DMSO.
- Figure S25.** <sup>1</sup>H–<sup>1</sup>H COSY spectrum of compound **4** in DMSO.
- Figure S26.** HMBC spectrum of compound **4** in DMSO.
- Figure S27.** NOESY spectrum of compound **4** in DMSO.
- Figure S28.** HRESIMS spectrum of compound **4**.
- Figure S29.** The proposed fragmentation scheme of compound **1** by ESI-QTrap-MS/MS.
- Figure S30.** <sup>1</sup>H NMR spectrum of compound **5** in DMSO.
- Figure S31.** <sup>1</sup>H NMR spectrum of compound **6** in DMSO.
- Figure S32.** <sup>1</sup>H NMR spectrum of compound **7** in CD<sub>3</sub>OD.
- Figure S33.** <sup>1</sup>H NMR spectrum of compound **8** in DMSO.
- Figure S34.** <sup>1</sup>H NMR spectrum of compound **9** in CD<sub>3</sub>OD.
- Figure S35.** <sup>1</sup>H NMR spectrum of compound **10** in CD<sub>3</sub>OD.
- Figure S36.** <sup>1</sup>H NMR spectrum of compound **11** in CD<sub>3</sub>OD.
- Figure S37.** <sup>1</sup>H NMR spectrum of compound **12** in CD<sub>3</sub>OD.
- Figure S38.** <sup>1</sup>H NMR spectrum of compound **13** in CDCl<sub>3</sub>.
- Figure S39.** <sup>1</sup>H NMR spectrum of compound **14** in CD<sub>3</sub>OD.
- Figure S40.** <sup>1</sup>H NMR spectrum of compound **15** in CD<sub>3</sub>OD.
- Figure S41.** <sup>1</sup>H NMR spectrum of compound **16** in CD<sub>3</sub>OD.
- Figure S42.** <sup>1</sup>H NMR spectrum of compound **17** in CD<sub>3</sub>OD.
- Figure S43.** <sup>1</sup>H NMR spectrum of compound **18** in CD<sub>3</sub>OD.

- Figure S44.**  $^1\text{H}$  NMR spectrum of compound **19** in  $\text{CD}_3\text{OD}$ .
- Figure S45.**  $^1\text{H}$  NMR spectrum of compound **20** in  $\text{CD}_3\text{OD}$ .
- Figure S46.**  $^1\text{H}$  NMR spectrum of compound **21** in  $\text{CD}_3\text{OD}$ .
- Figure S47.**  $^1\text{H}$  NMR spectrum of compound **22** in  $\text{CD}_3\text{OD}$ .
- Figure S48.** Gibbs free energy and equilibrium populations of low-energy conformers of **1** in ECD calculations.
- Figure S49.** Gibbs free energy and equilibrium populations of low-energy conformers of **3** in ECD calculations.
- Figure S50.** Gibbs free energy and equilibrium populations of low-energy conformers of **4** in ECD calculations.
- Figure S51.** UV spectrum of compounds **1-4**.
- Figure S52.** Inhibitory effects of compounds **1–22** ( $1\ \mu\text{M}$ ) on LPS-induced nitrite production in BV-2.

Figure S1. <sup>1</sup>H NMR spectrum of compound 1 in DMSO.

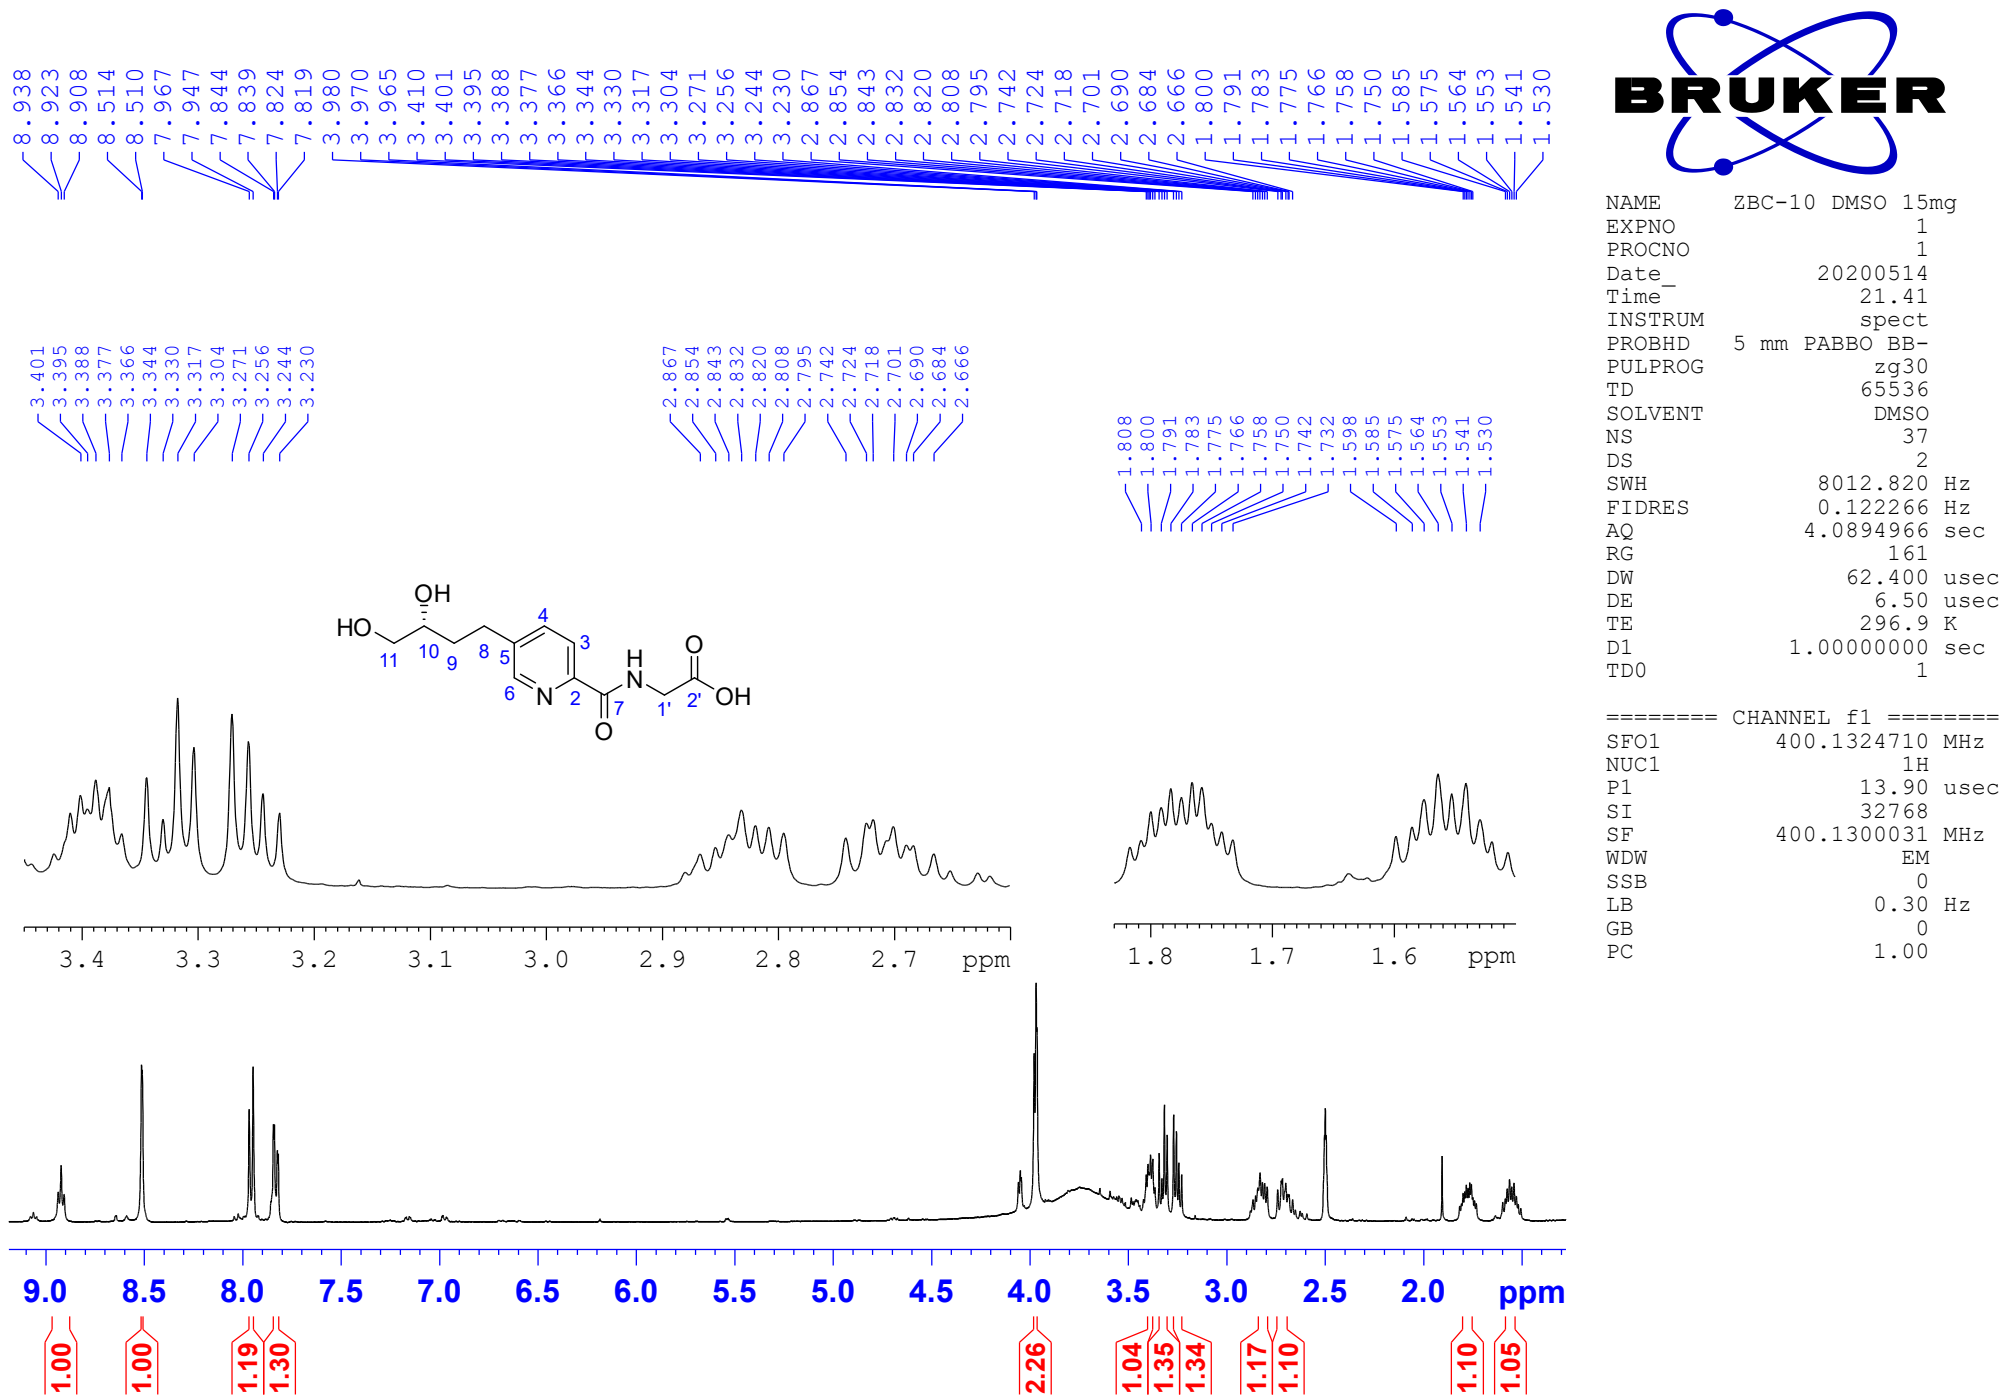



**Figure S2.**  $^{13}\text{C}$  NMR spectrum of compound **1** in DMSO.

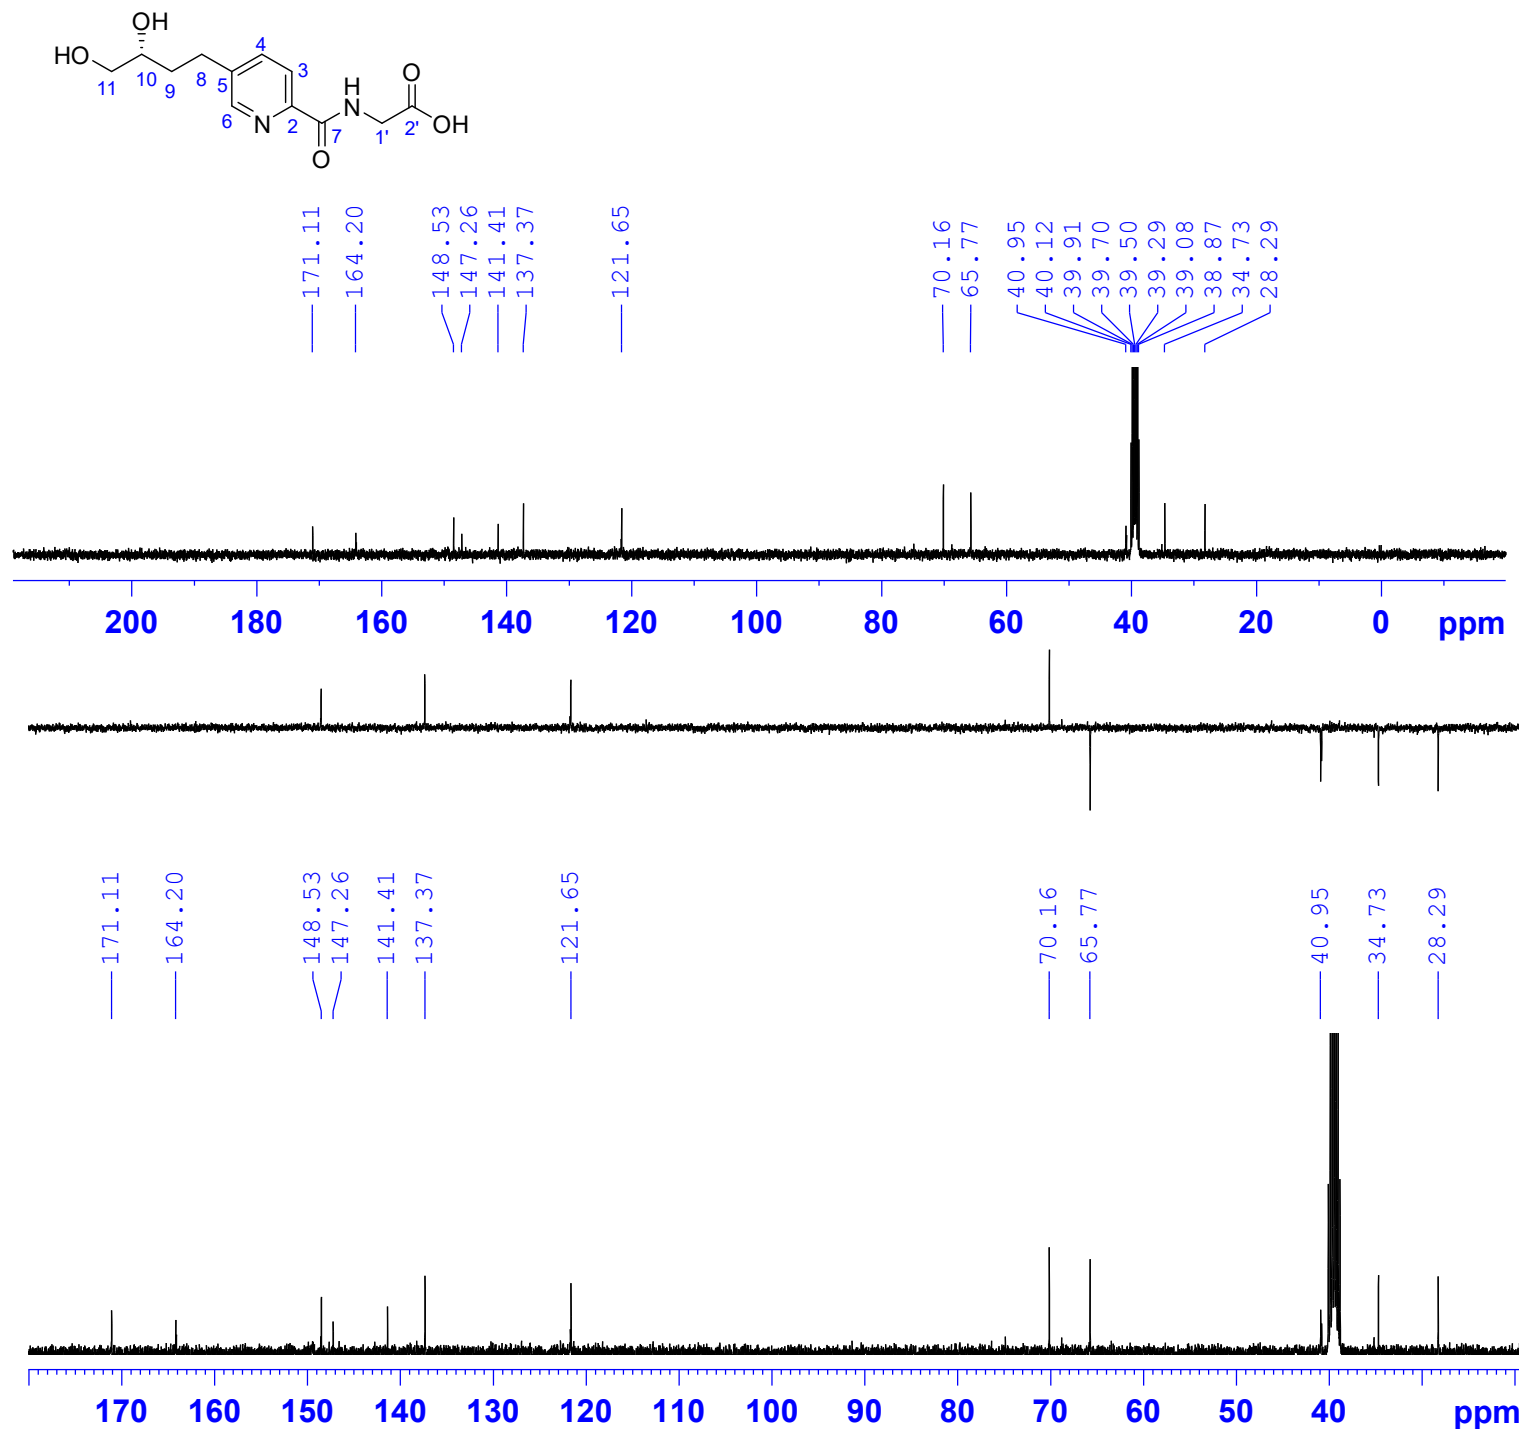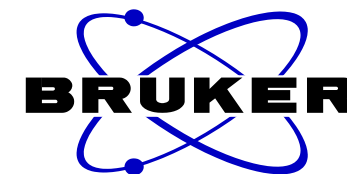

NAME ZBC-10 DMSO 15mg  
EXPNO 2  
PROCNO 1  
Date\_ 20200514  
Time\_ 21.45  
INSTRUM spect  
PROBHD 5 mm PABBO BB-  
PULPROG zgpg30  
TD 65536  
SOLVENT DMSO  
NS 175  
DS 4  
SWH 24038.461 Hz  
FIDRES 0.366798 Hz  
AQ 1.3631988 sec  
RG 203  
DW 20.800 usec  
DE 6.50 usec  
TE 297.4 K  
D1 2.00000000 sec  
D11 0.03000000 sec  
TD0 1

===== CHANNEL f1 =====  
SFO1 100.6228293 MHz  
NUC1 13C  
P1 12.37 usec  
SI 32768  
SF 100.6128129 MHz  
WDW EM  
SSB 0  
LB 1.00 Hz  
GB 0  
PC 1.40

**Figure S3.** HSQC spectrum of compound **1** in DMSO.

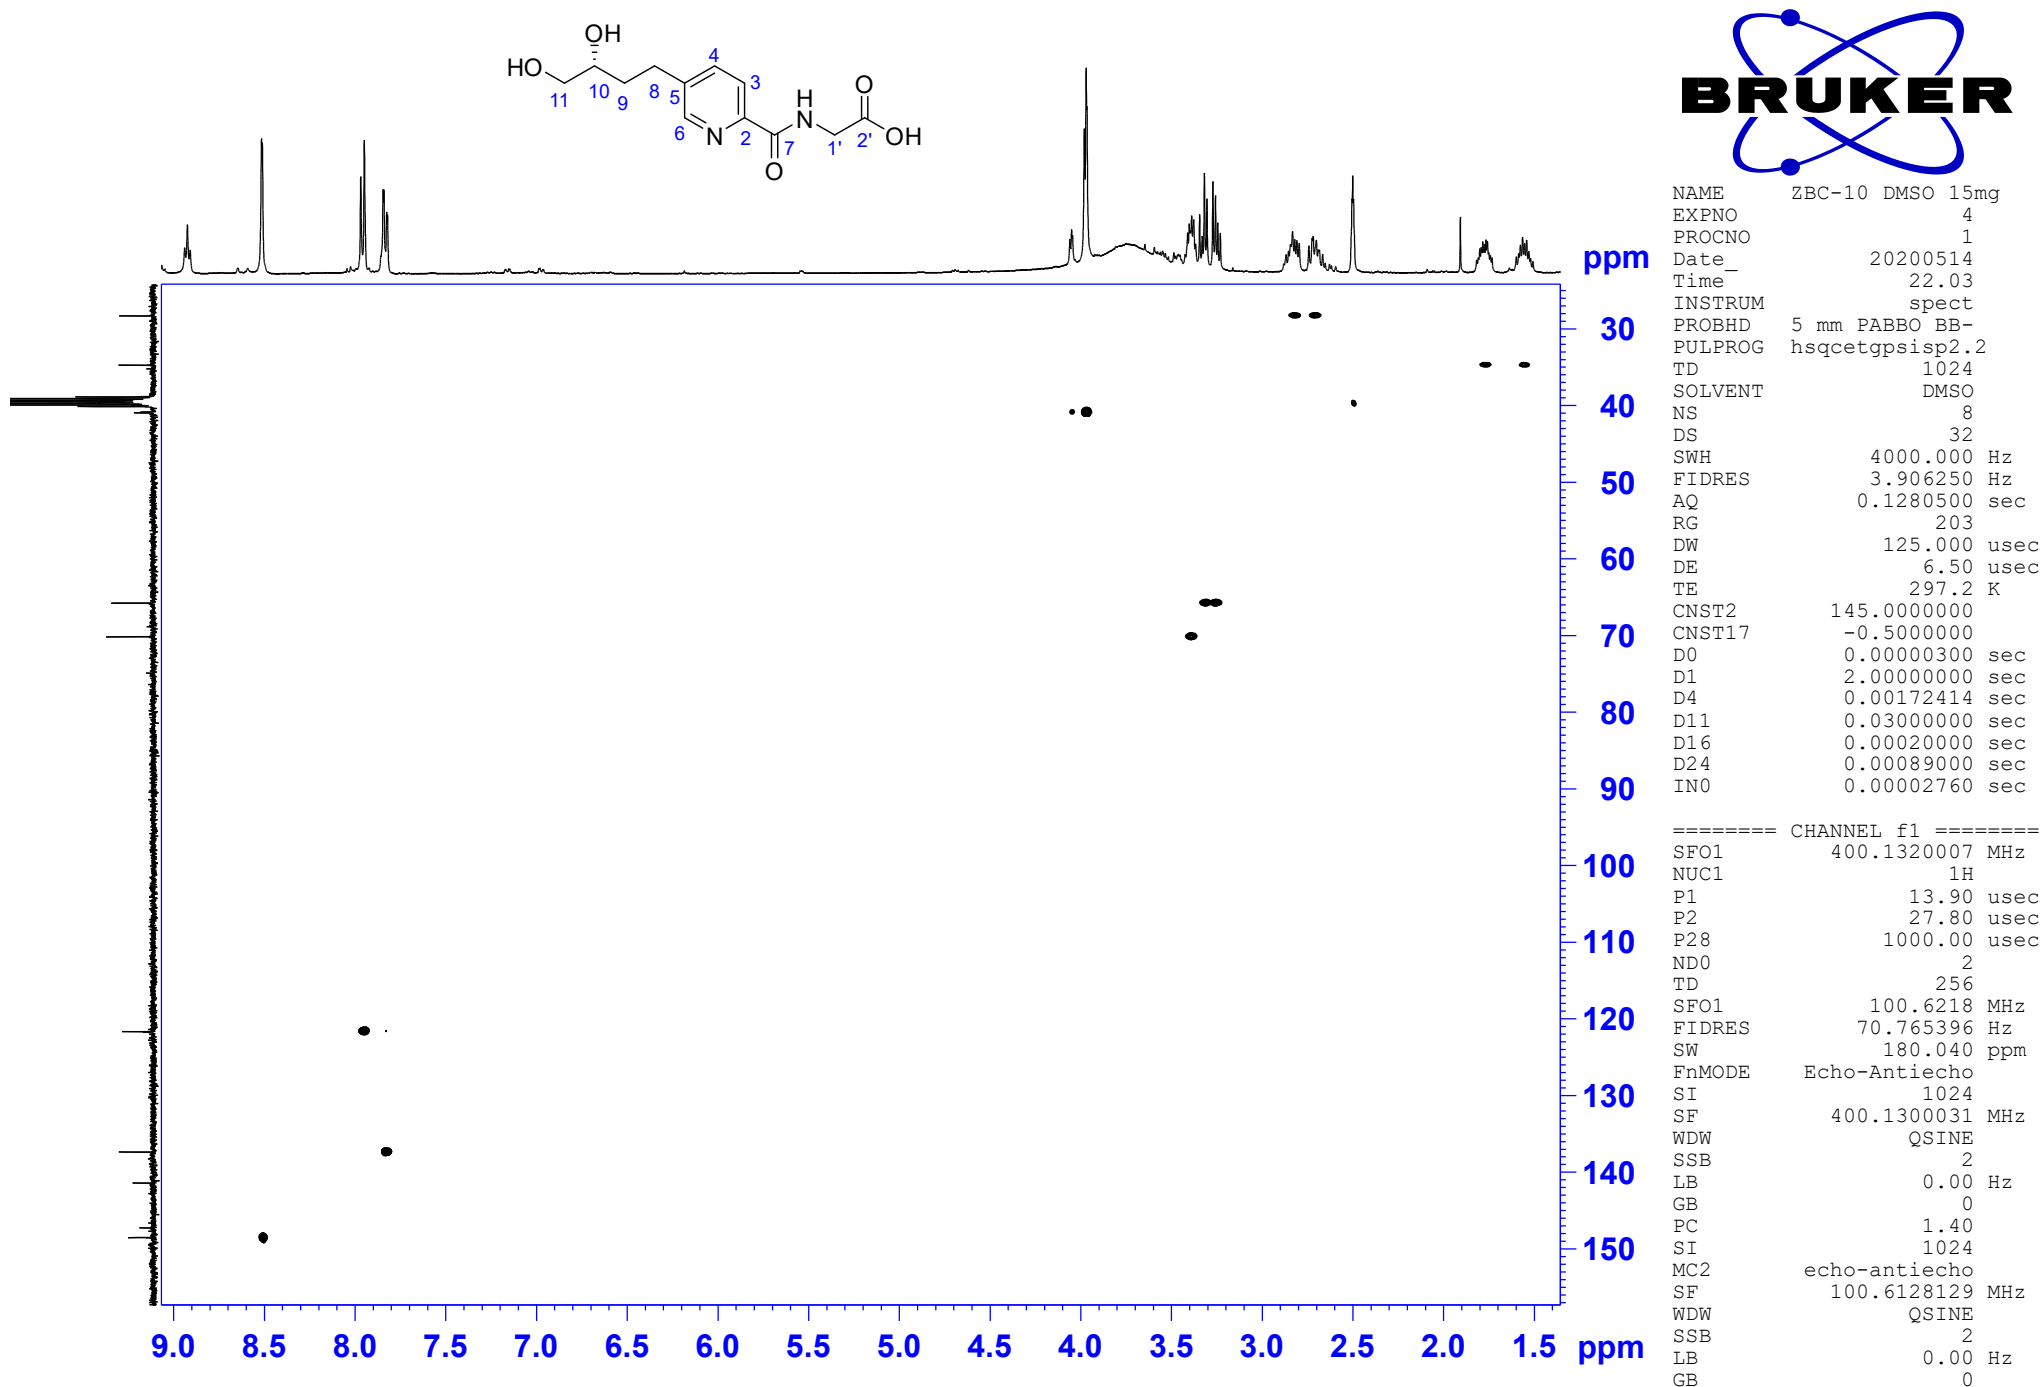

**Figure S4.**  $^1\text{H}$ – $^1\text{H}$  COSY spectrum of compound **1** in DMSO.

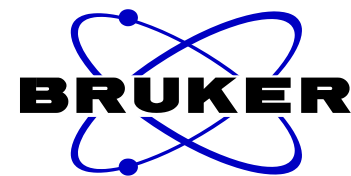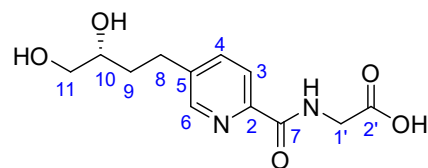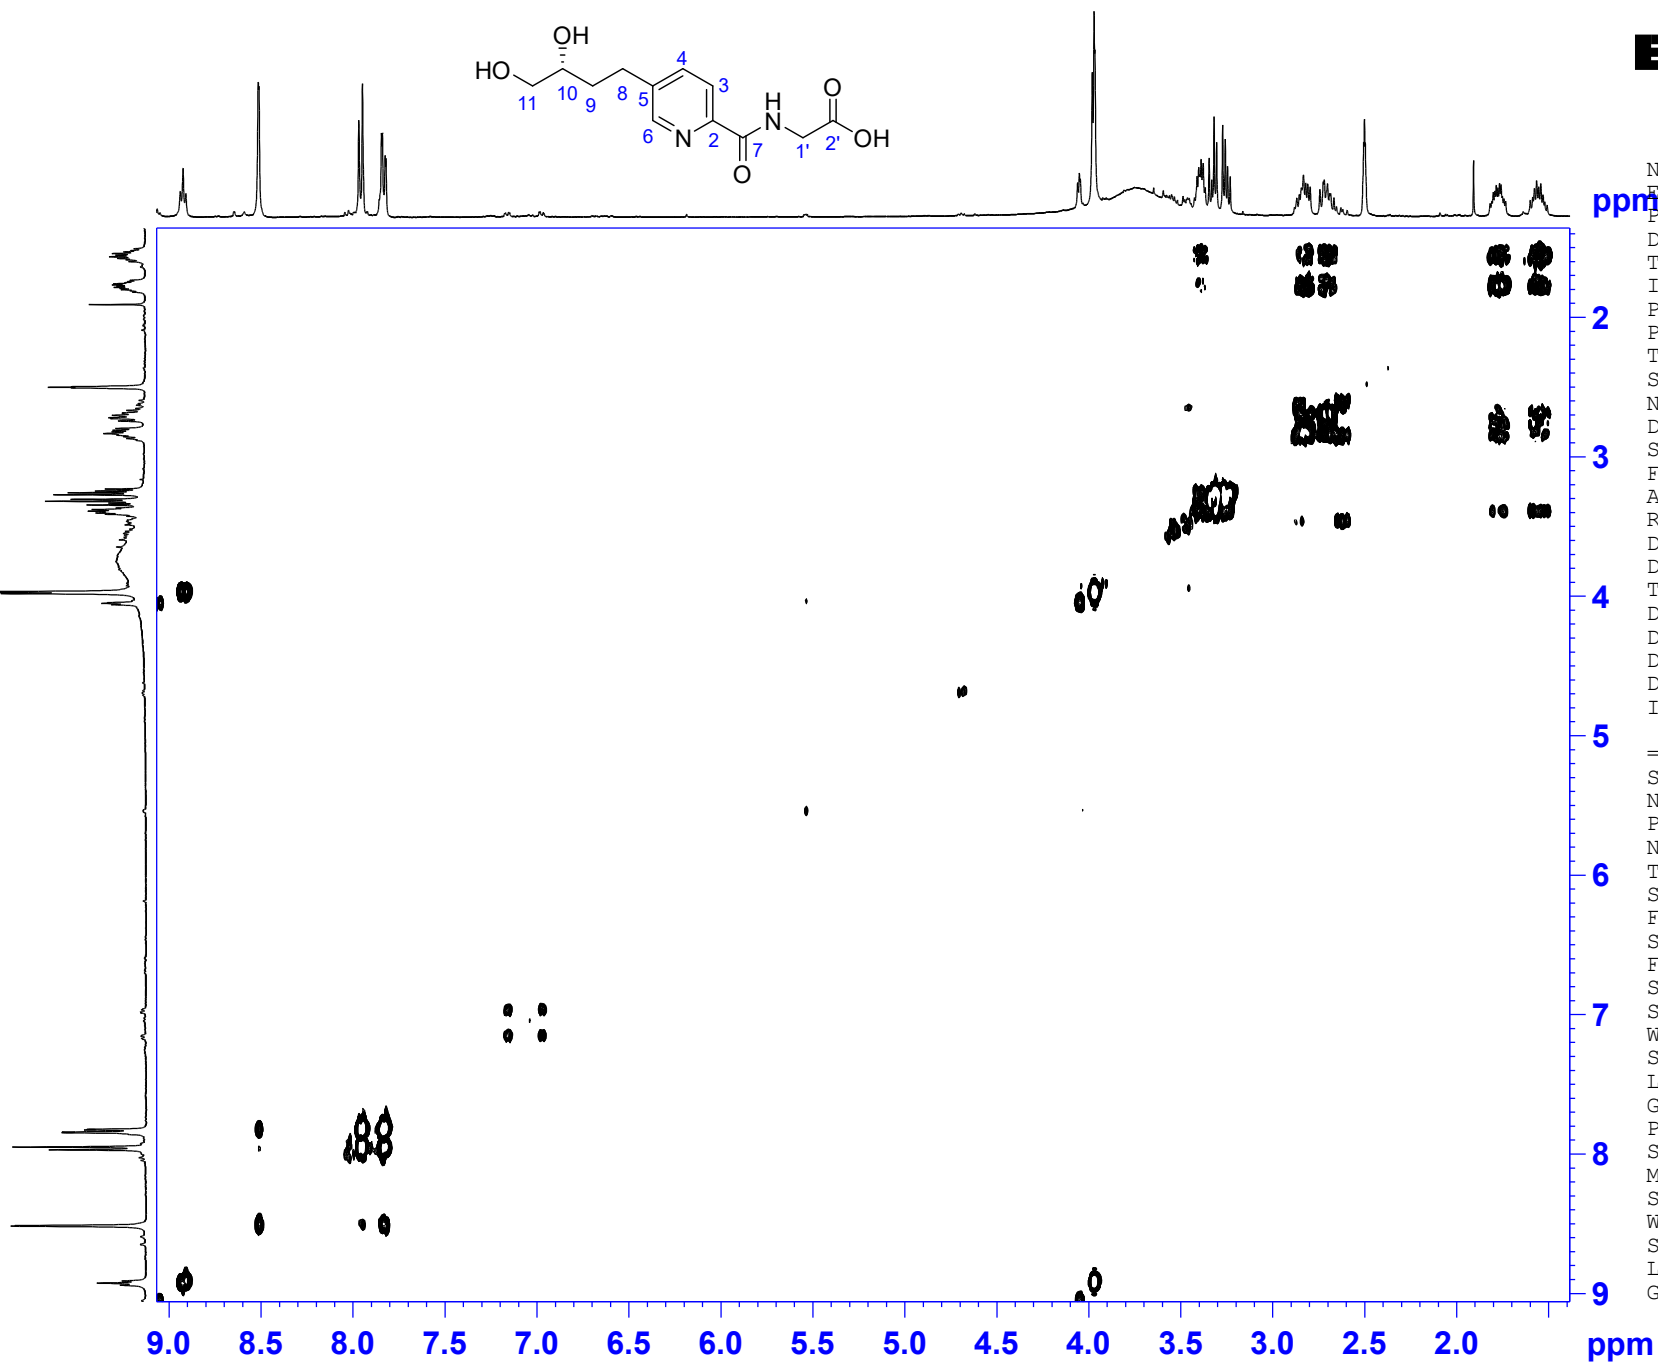

NAME ZBC-10 DMSO 15mg  
 EXPNO 5  
 PROCNO 1  
 Date\_ 20200514  
 Time\_ 23.17  
 INSTRUM spect  
 PROBHD 5 mm PABBO BB-  
 PULPROG cosygpmfzf  
 TD 2048  
 SOLVENT DMSO  
 NS 8  
 DS 8  
 SWH 4000.000 Hz  
 FIDRES 1.953125 Hz  
 AQ 0.2560500 sec  
 RG 203  
 DW 125.000 usec  
 DE 6.50 usec  
 TE 297.1 K  
 D0 0.00000300 sec  
 D1 2.00000000 sec  
 D13 0.00000400 sec  
 D16 0.00020000 sec  
 IN0 0.00025000 sec

===== CHANNEL f1 =====  
 SFO1 400.1320007 MHz  
 NUC1  $^1\text{H}$   
 P1 13.90 usec  
 ND0 1  
 TD 128  
 SFO1 400.132 MHz  
 FIDRES 31.250000 Hz  
 SW 9.997 ppm  
 FnmODE QF  
 SI 1024  
 SF 400.1300031 MHz  
 WDW SINE  
 SSB 0  
 LB 0.00 Hz  
 GB 0  
 PC 1.40  
 SI 1024  
 MC2 QF  
 SF 400.1300031 MHz  
 WDW SINE  
 SSB 0  
 LB 0.00 Hz  
 GB 0

Figure S5. HMBC spectrum of compound **1** in DMSO.

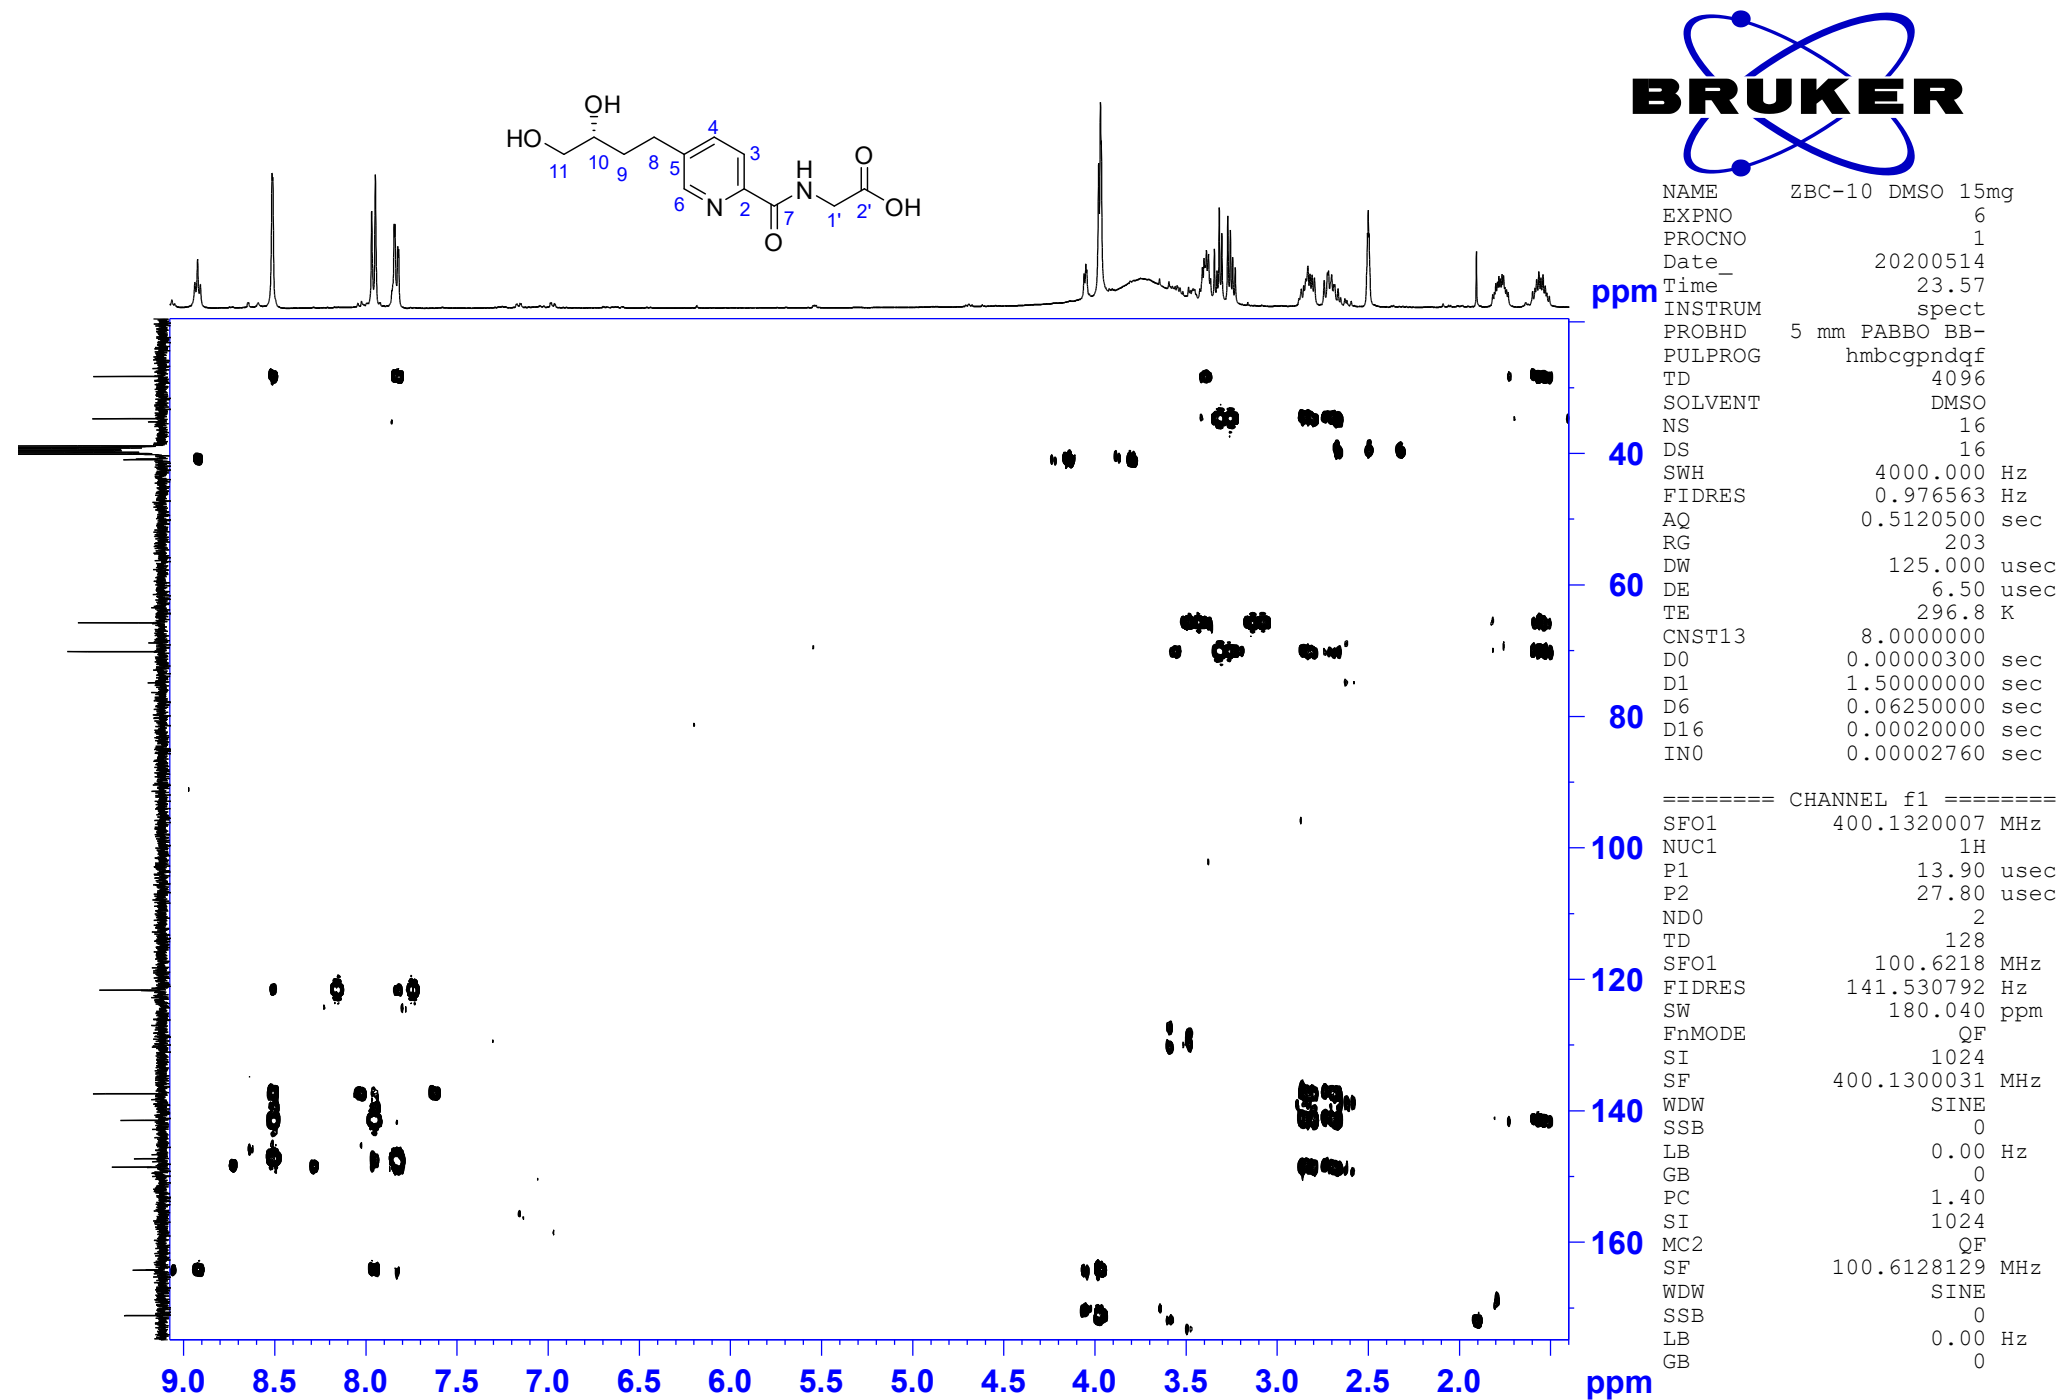

**Figure S6.** NOESY spectrum of compound **1** in DMSO.

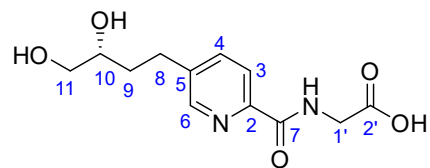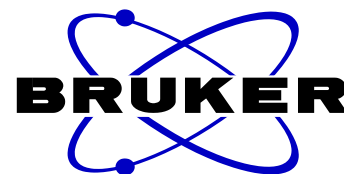

NAME ZBC-10 DMSO 15mg  
 EXPNO 7  
 PROCNO 1  
 Date\_ 20200515  
 Time\_ 1.11  
 INSTRUM spect  
 PROBHD 5 mm PABBO BB-  
 PULPROG noesygpph  
 TD 2048  
 SOLVENT DMSO  
 NS 32  
 DS 32  
 SWH 4000.000 Hz  
 FIDRES 1.953125 Hz  
 AQ 0.2560500 sec  
 RG 203  
 DW 125.000 usec  
 DE 6.50 usec  
 TE 296.8 K  
 D0 0.00010730 sec  
 D1 2.00000000 sec  
 D8 0.30000001 sec  
 D11 0.03000000 sec  
 D12 0.00002000 sec  
 D16 0.00020000 sec  
 IN0 0.00025000 sec

===== CHANNEL f1 =====  
 SFO1 400.1320007 MHz  
 NUC1 1H  
 P1 13.90 usec  
 P2 27.80 usec  
 P17 2500.00 usec  
 ND0 1  
 TD 256  
 SFO1 400.132 MHz  
 FIDRES 15.625000 Hz  
 SW 9.997 ppm  
 FnMODE States-TPPI  
 SI 1024  
 SF 400.1300031 MHz  
 WDW QSINE  
 SSB 2  
 LB 0.00 Hz  
 GB 0  
 PC 1.00  
 SI 1024  
 MC2 States-TPPI  
 SF 400.1300031 MHz  
 WDW QSINE  
 SSB 2  
 LB 0.00 Hz  
 GB 0

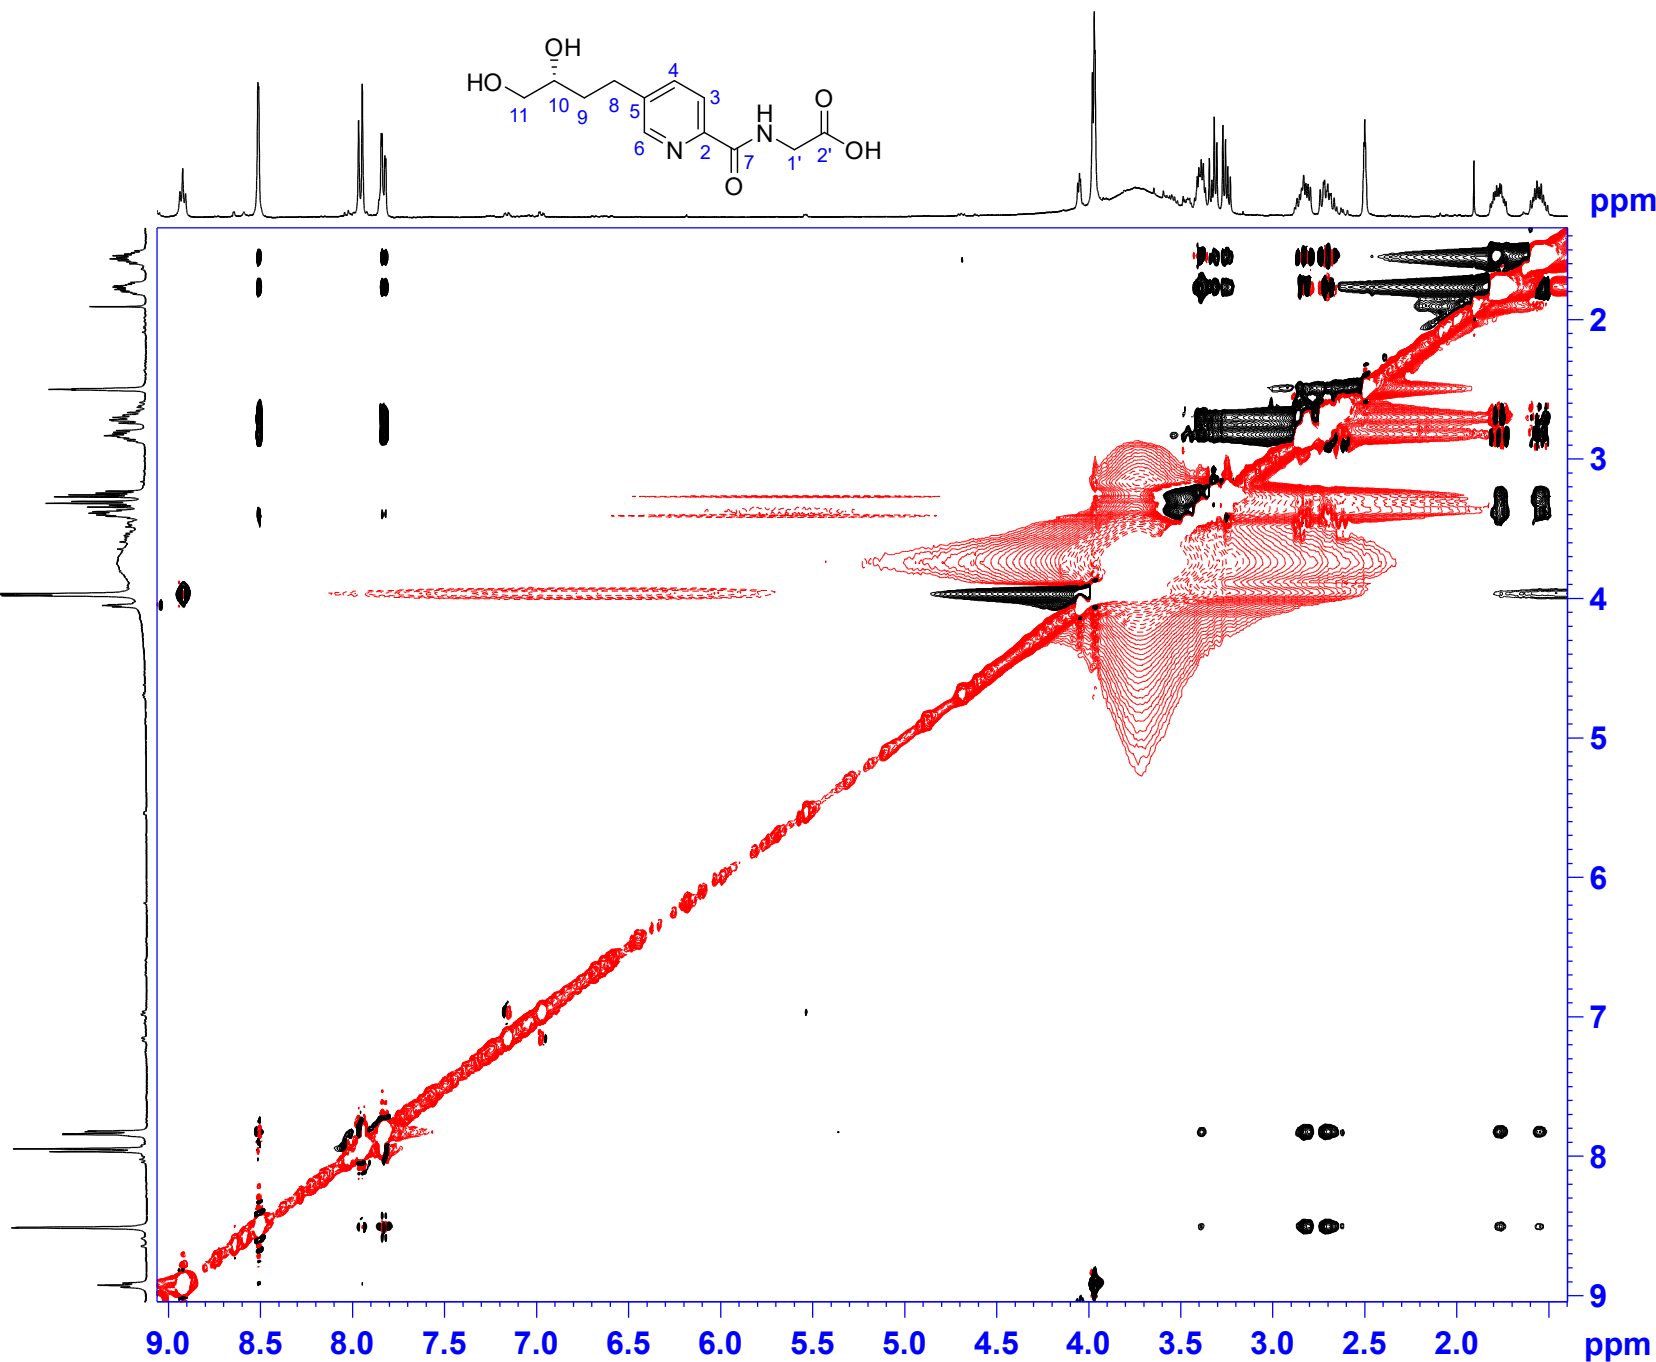

Figure S7. HRESIMS spectrum of compound 1.

Elemental Composition Report

Single Mass Analysis

Tolerance = 40.0 mDa / DBE: min = -1.5, max = 50.0  
Element prediction: Off  
Number of isotope peaks used for i-FIT = 3

Monoisotopic Mass, Even Electron Ions  
61 formula(e) evaluated with 4 results within limits (up to 50 best isotopic matches for each mass)  
Elements Used:  
C: 0-13 H: 0-50 N: 0-5 O: 0-5  
ZBC-10 101 (0.400) Cm (70:203)  
1: TOF MS ES+

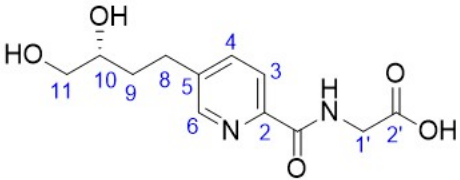

Chemical Formula: C<sub>12</sub>H<sub>17</sub>N<sub>2</sub>O<sub>5</sub><sup>+</sup>  
Exact Mass: 269.1132

3.47e+007

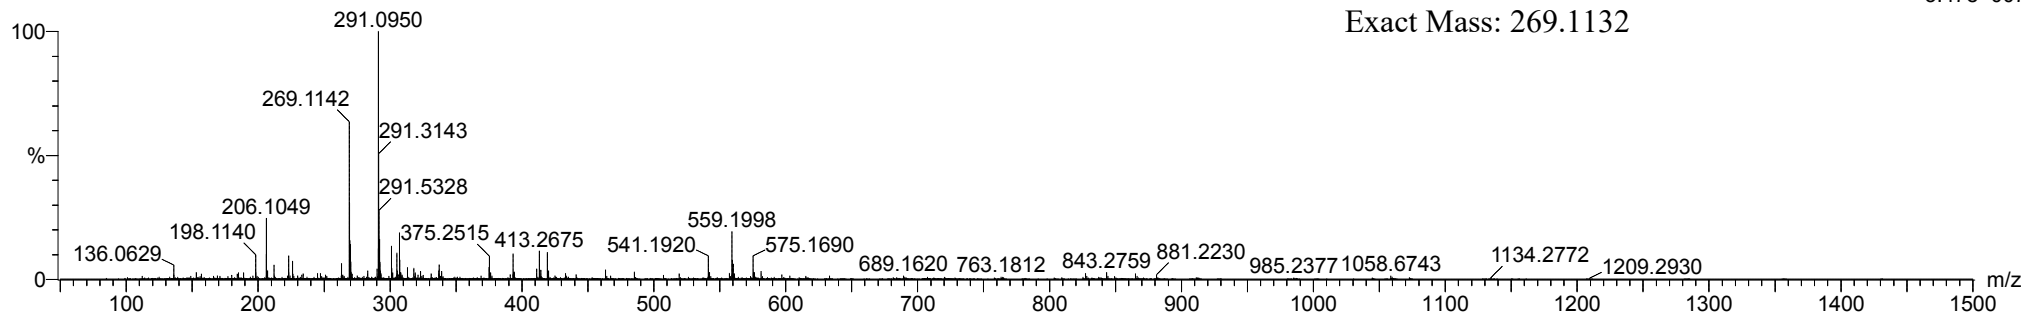

Minimum: -1.5  
Maximum: 40.0 10.0 50.0

| Mass     | Calc. Mass | mDa   | PPM    | DBE | i-FIT  | Norm  | Conf (%) | Formula       |
|----------|------------|-------|--------|-----|--------|-------|----------|---------------|
| 269.1142 | 269.1137   | 0.5   | 1.9    | 5.5 | 2594.2 | 0.563 | 56.97    | C12 H17 N2 O5 |
|          | 269.1501   | -35.9 | -133.4 | 4.5 | 2595.0 | 1.349 | 25.96    | C13 H21 N2 O4 |
|          | 269.1250   | -10.8 | -40.1  | 5.5 | 2595.9 | 2.253 | 10.51    | C11 H17 N4 O4 |
|          | 269.0886   | 25.6  | 95.1   | 6.5 | 2596.4 | 2.724 | 6.56     | C10 H13 N4 O5 |

**Figure S8.**  $^1\text{H}$  NMR spectrum of compound **2** in  $\text{CD}_3\text{OD}$ .

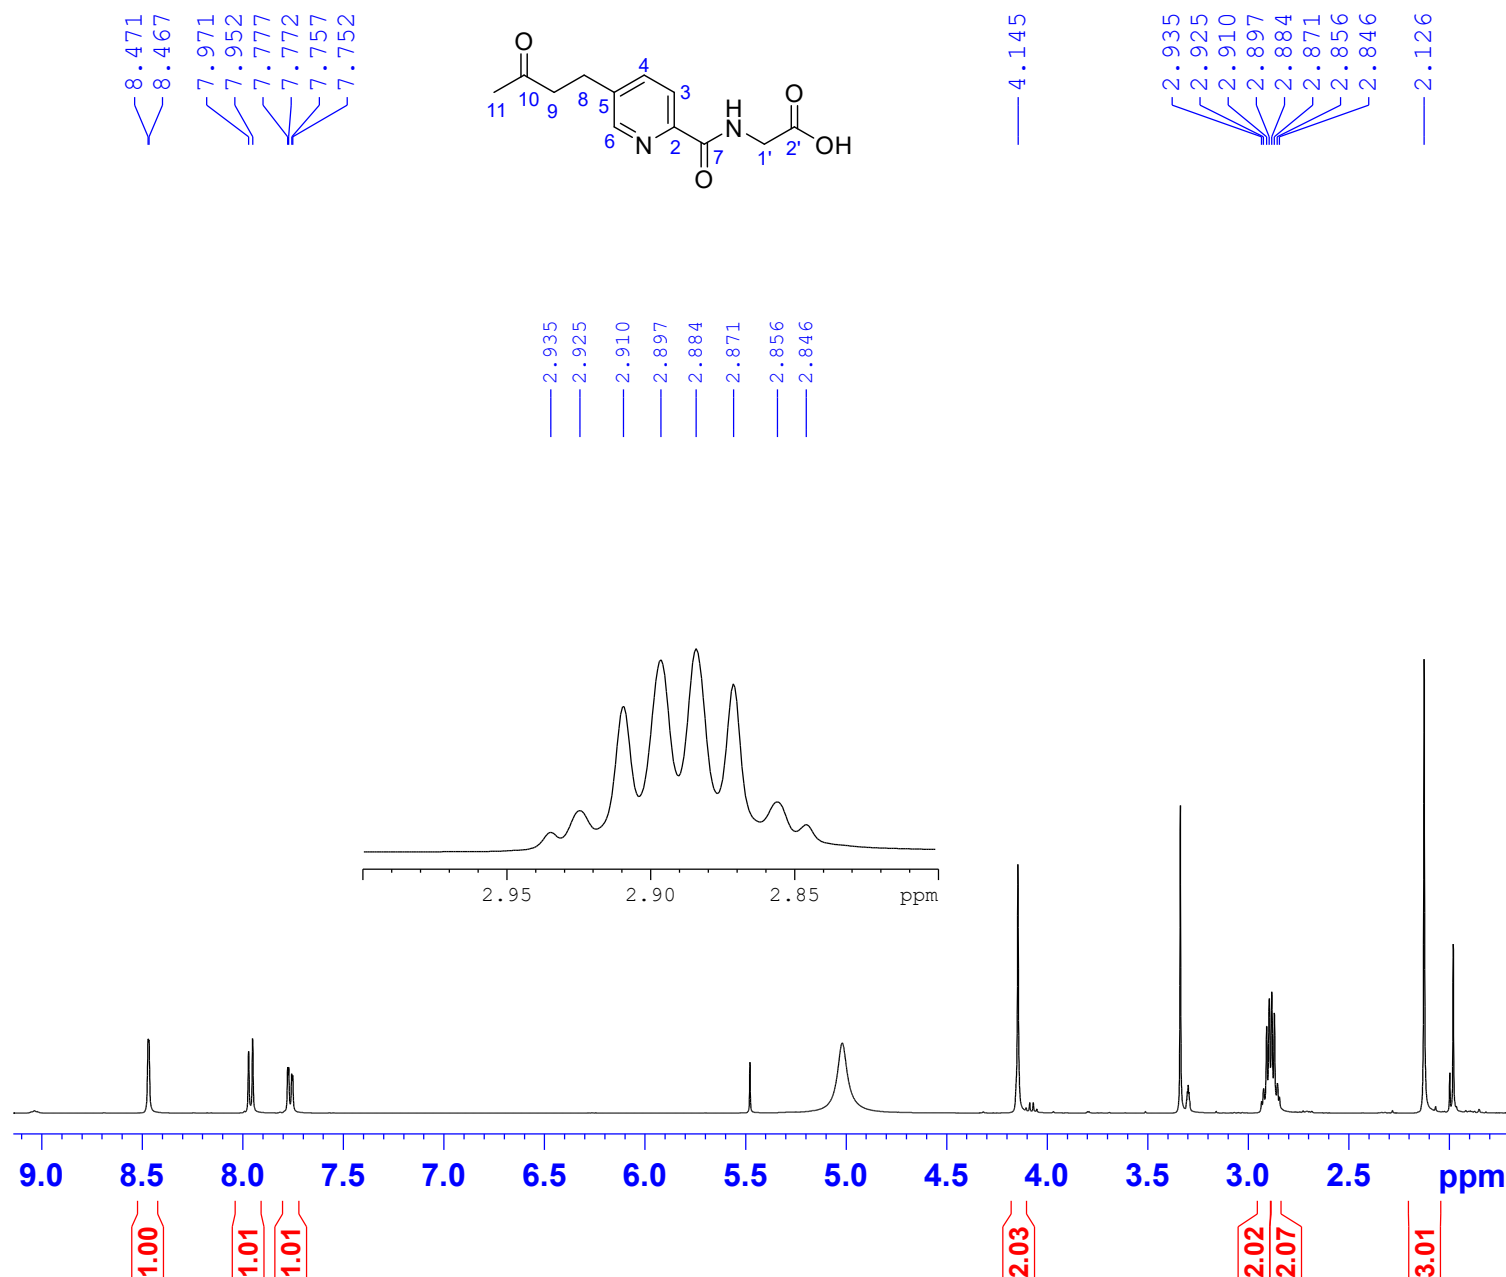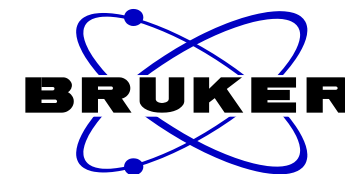

```

NAME      ZBC-2 M 62mg
EXPNO      1
PROCNO     1
Date_      20200323
Time       22.39
INSTRUM    spect
PROBHD     5 mm PABBO BB-
PULPROG    zg30
TD         65536
SOLVENT    MeOD
NS         128
DS         2
SWH        8012.820 Hz
FIDRES     0.122266 Hz
AQ         4.0894966 sec
RG         64
DW         62.400 usec
DE         6.50 usec
TE         294.4 K
D1         1.00000000 sec
TD0        1
    
```

```

===== CHANNEL f1 =====
SFO1      400.1324710 MHz
NUC1      1H
P1        13.90 usec
SI        32768
SF        400.1300115 MHz
WDW       EM
SSB       0
LB        0.30 Hz
GB        0
PC        1.00
    
```

**Figure S9.**  $^{13}\text{C}$  NMR spectrum of compound **2** in  $\text{CD}_3\text{OD}$ .

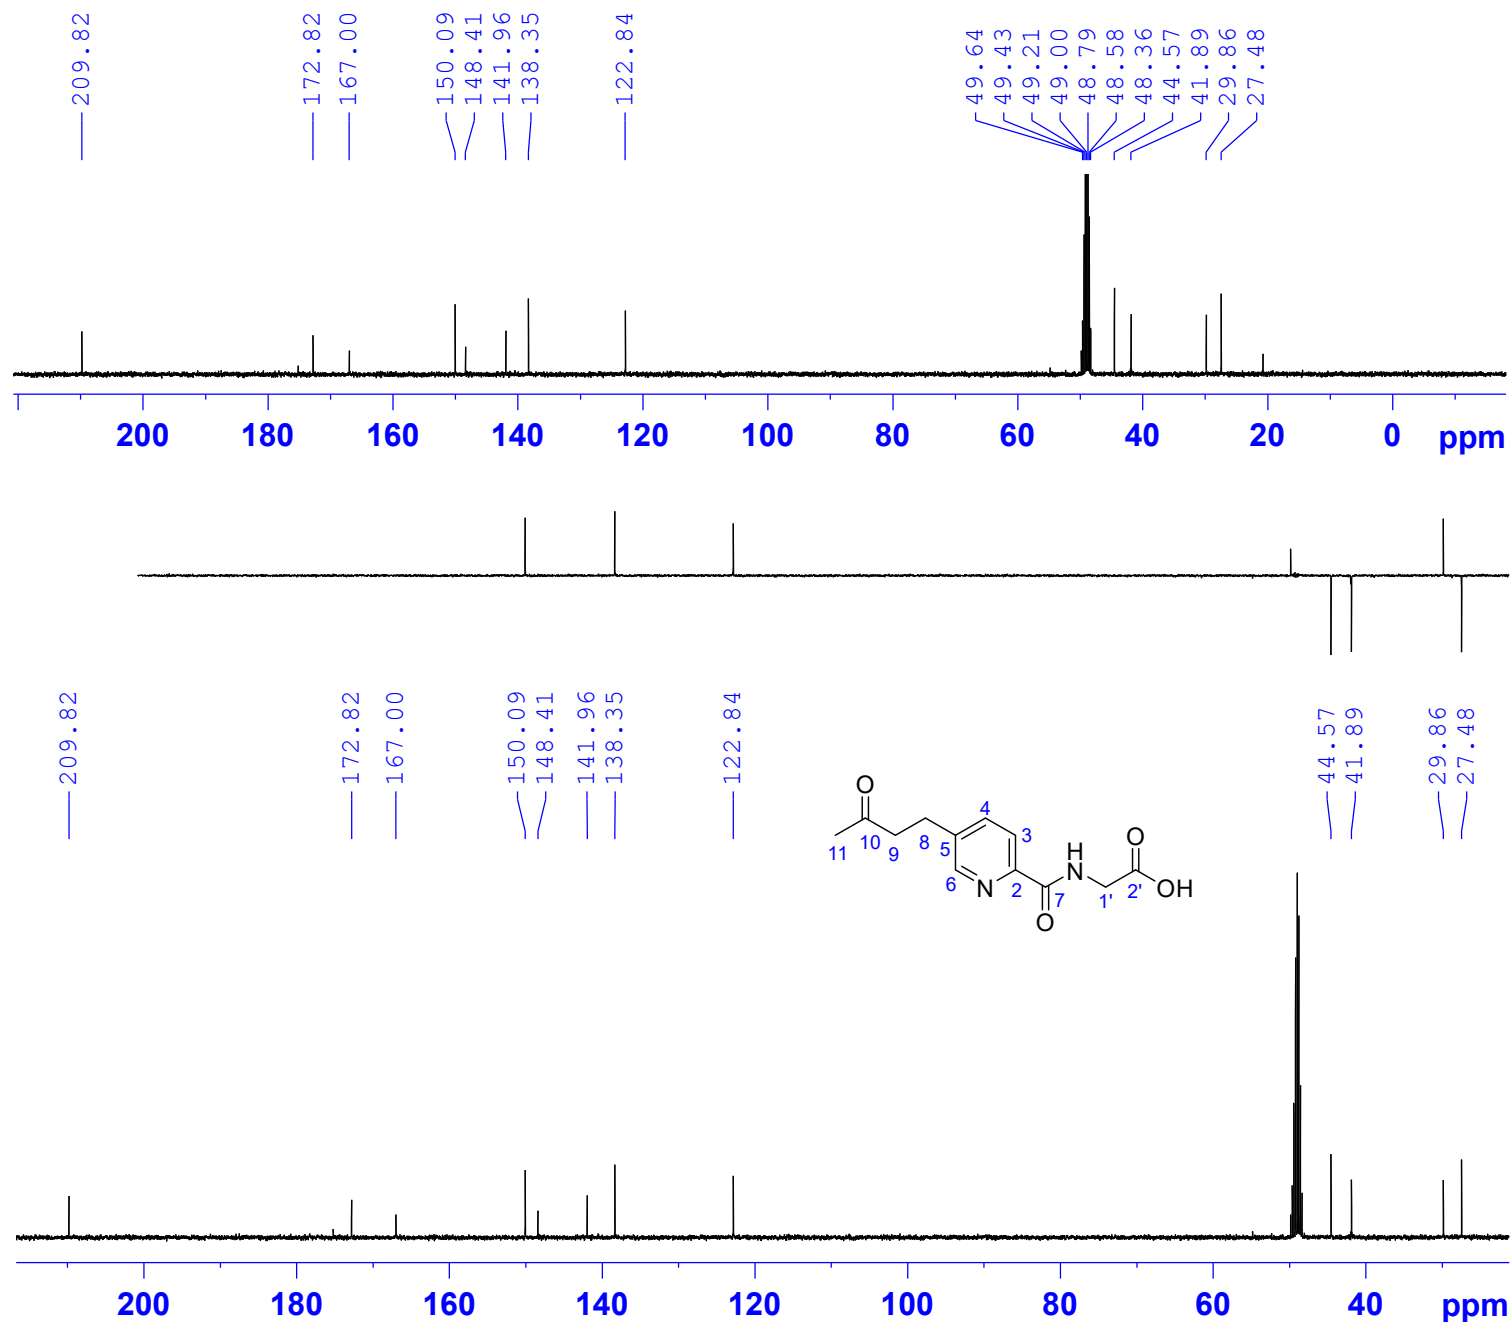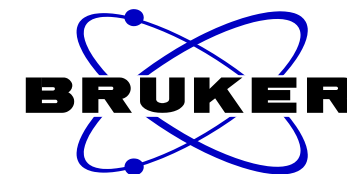

NAME ZBC-2 M 62mg  
 EXPNO 2  
 PROCNO 1  
 Date\_ 20200323  
 Time\_ 22.56  
 INSTRUM spect  
 PROBHD 5 mm PABBO BB-  
 PULPROG zgpg30  
 TD 65536  
 SOLVENT MeOD  
 NS 36  
 DS 4  
 SWH 24038.461 Hz  
 FIDRES 0.366798 Hz  
 AQ 1.3631988 sec  
 RG 203  
 DW 20.800 usec  
 DE 6.50 usec  
 TE 294.4 K  
 D1 2.00000000 sec  
 D11 0.03000000 sec  
 TD0 1

===== CHANNEL f1 =====  
 SFO1 100.6228293 MHz  
 NUC1  $^{13}\text{C}$   
 P1 12.37 usec  
 SI 32768  
 SF 100.6126354 MHz  
 WDW EM  
 SSB 0  
 LB 1.00 Hz  
 GB 0  
 PC 1.40



Figure S10. HSQC spectrum of compound 2 in CD<sub>3</sub>OD.

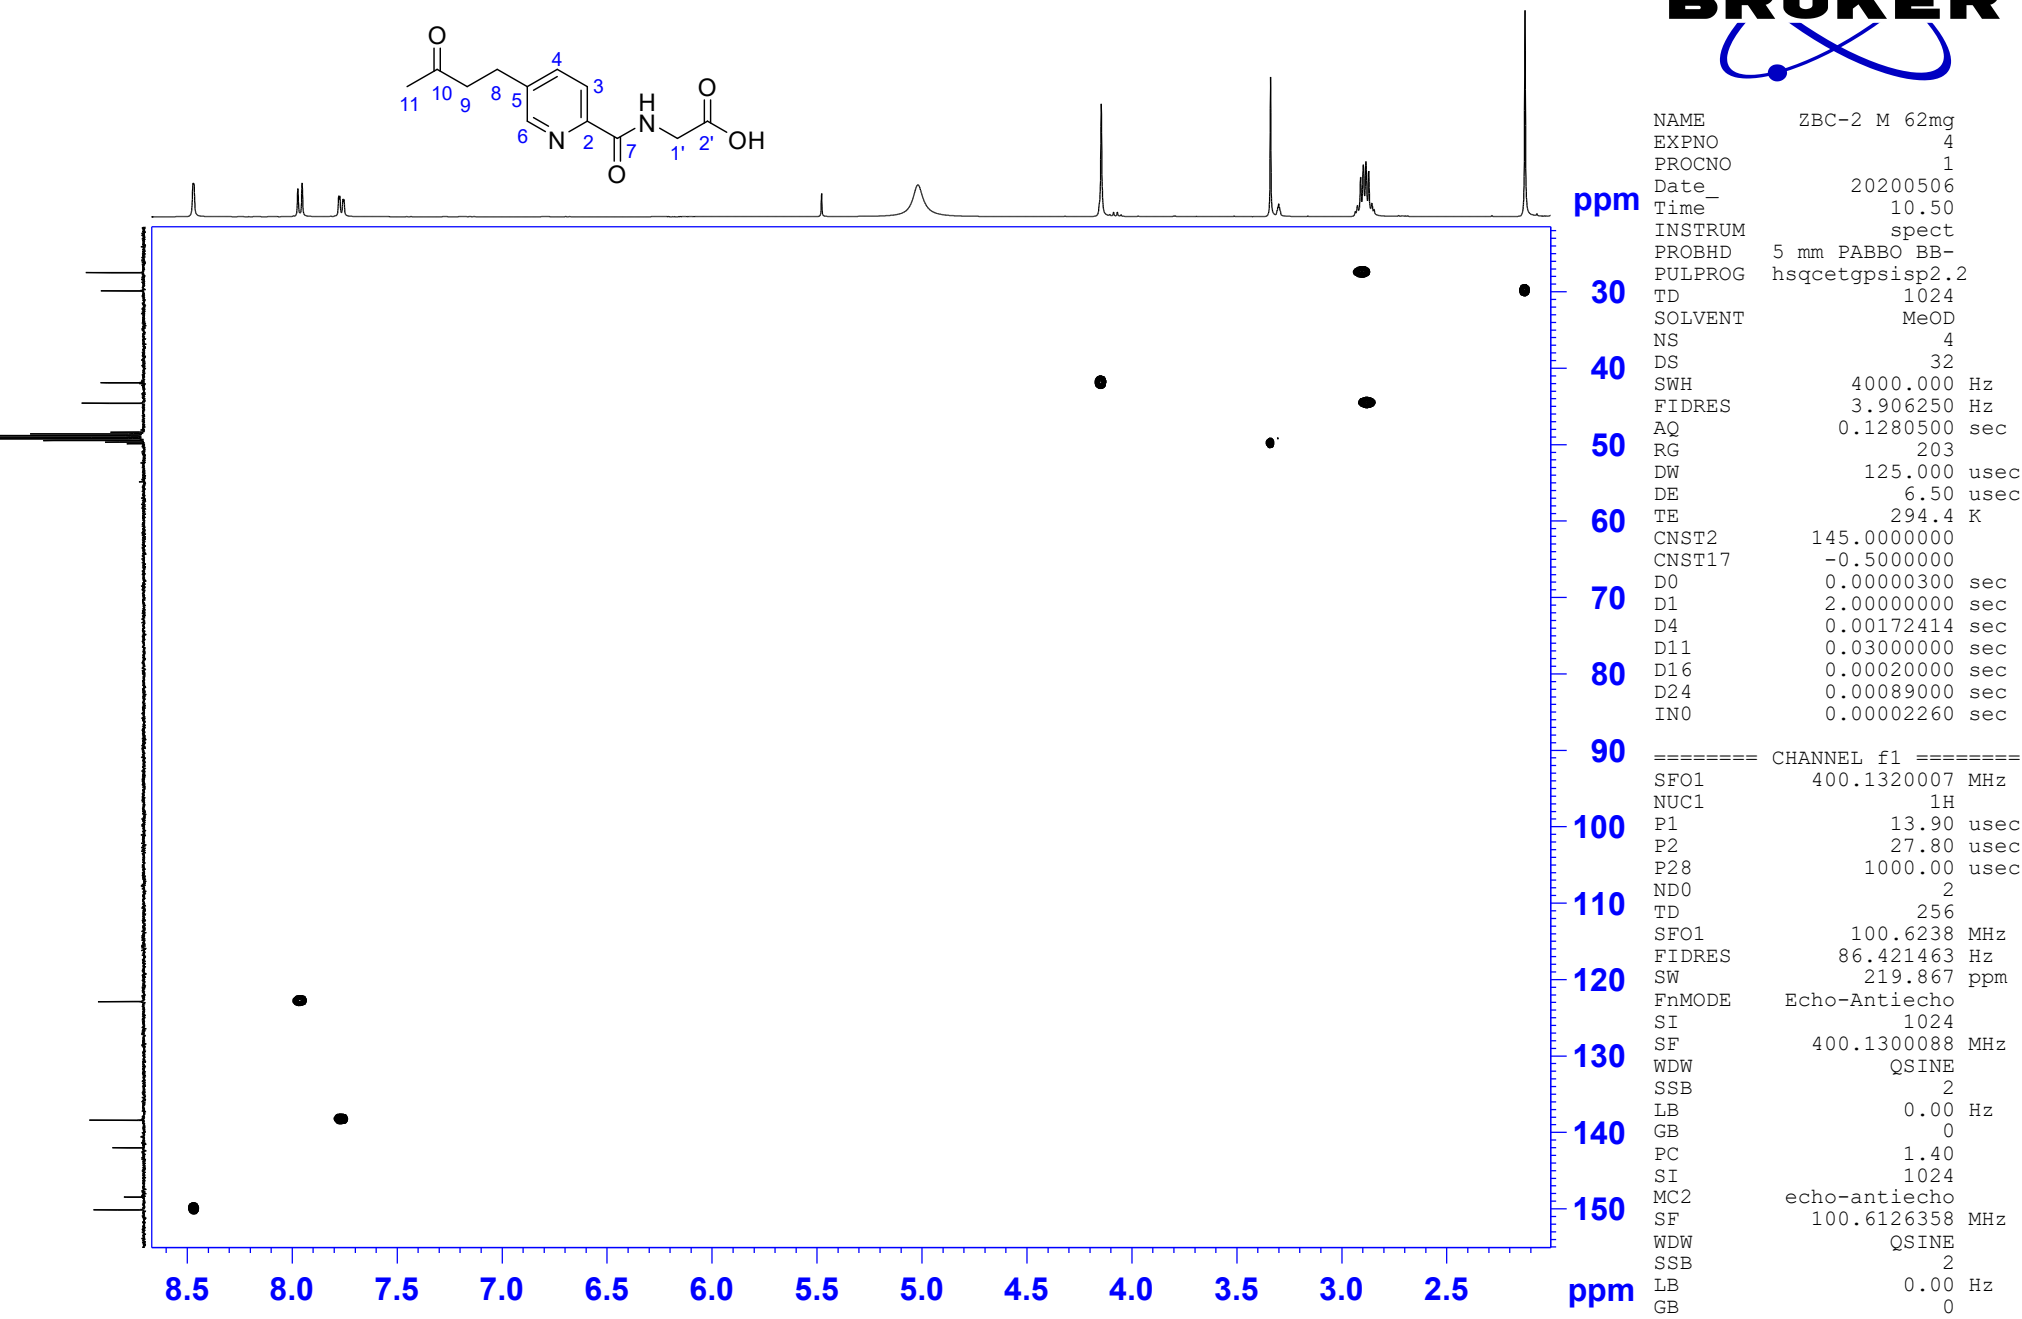

**Figure S11.**  $^1\text{H}$ - $^1\text{H}$  COSY spectrum of compound **2** in  $\text{CD}_3\text{OD}$ .

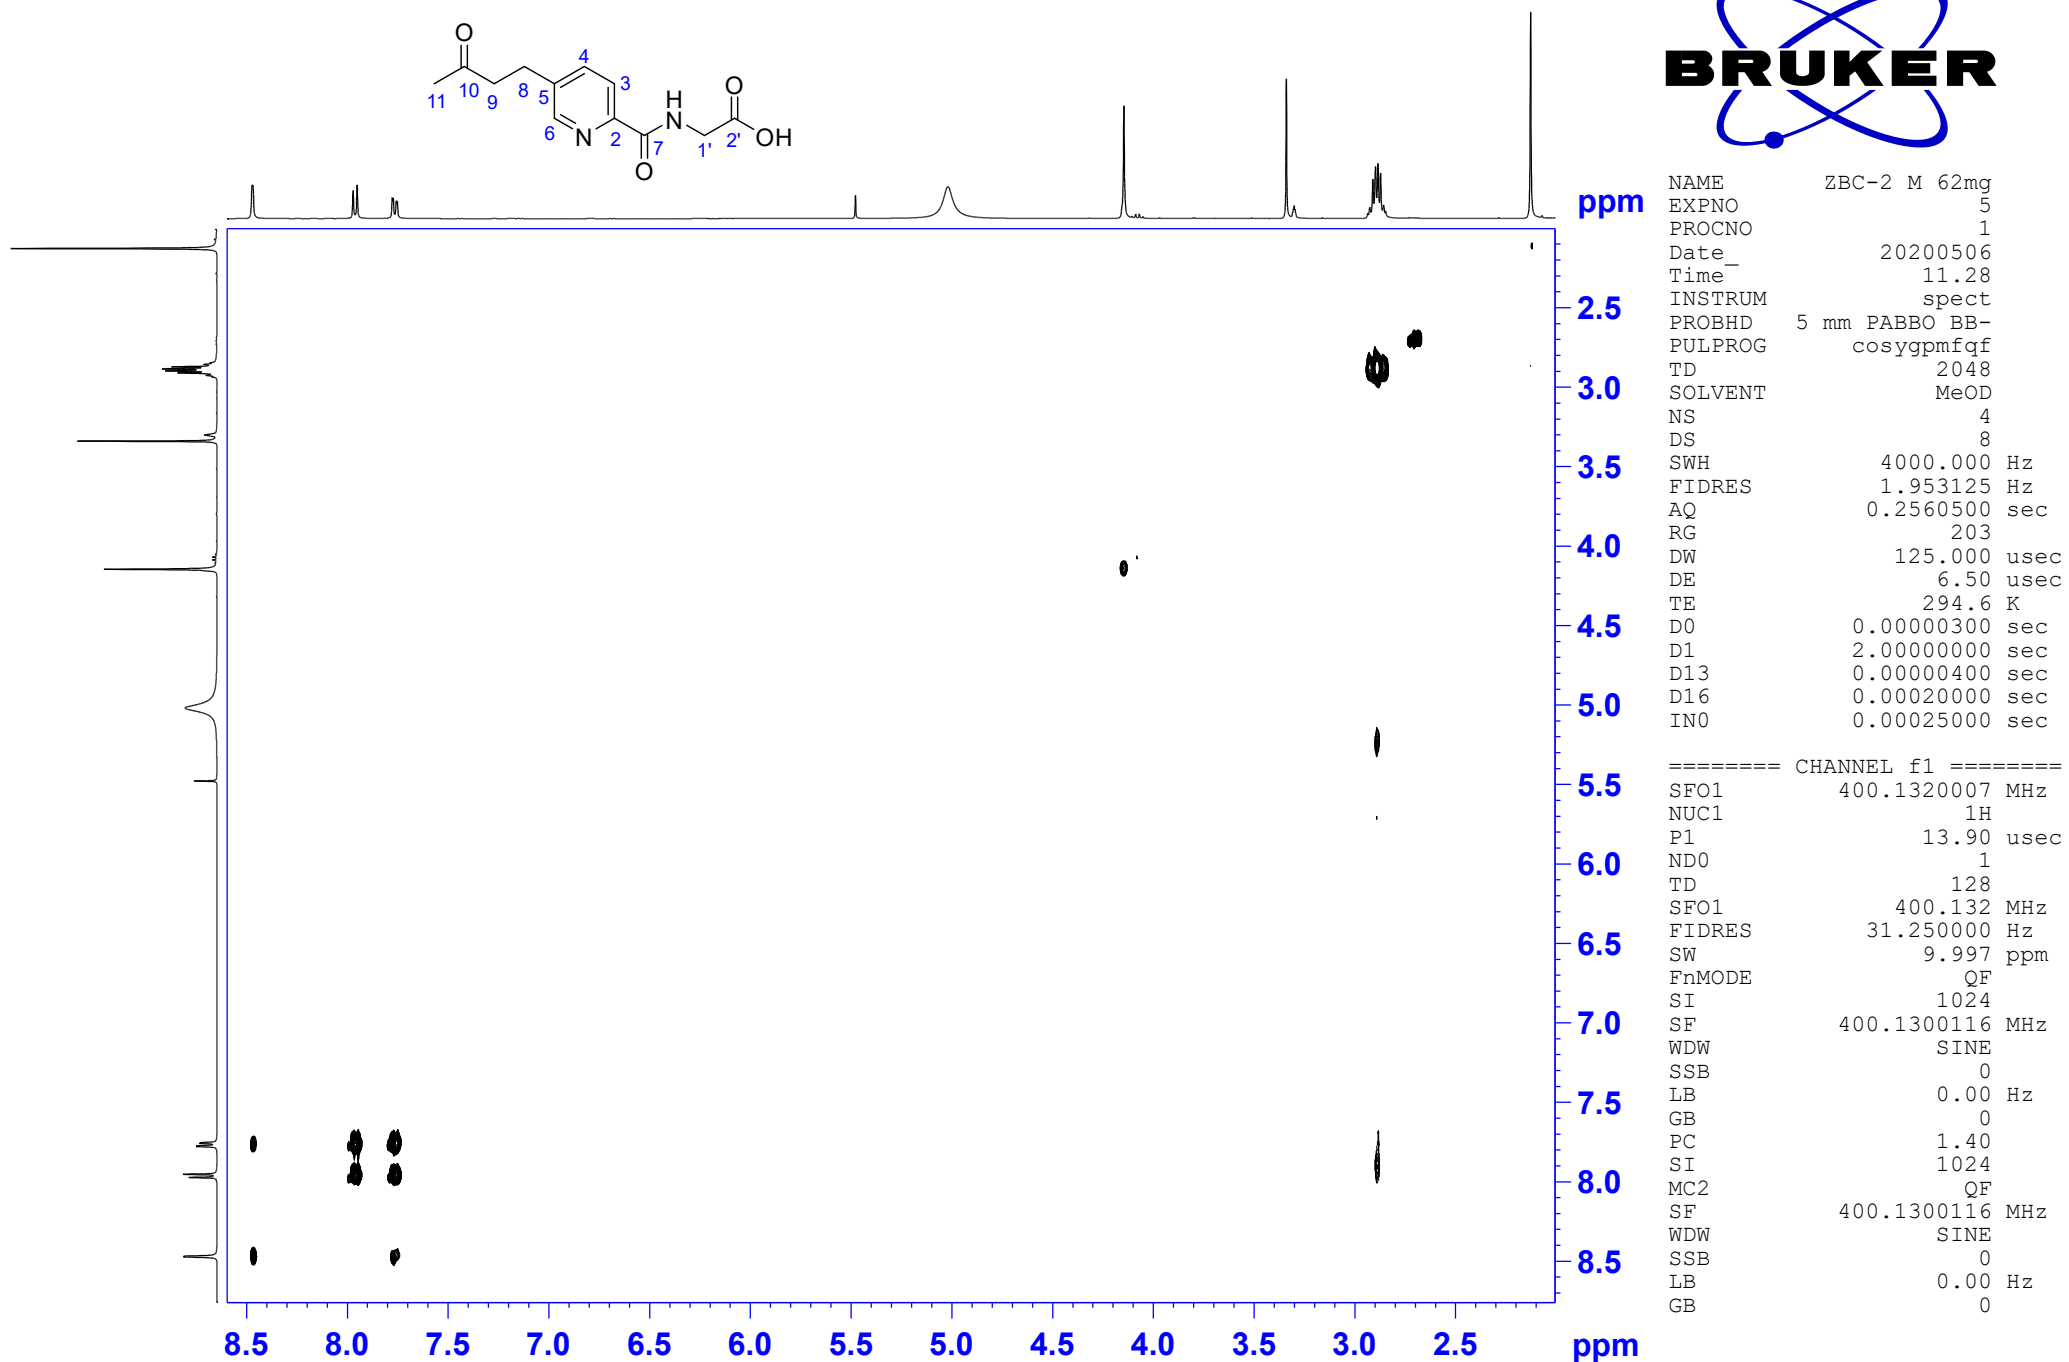

**Figure S12.** HMBC spectrum of compound **2** in CD<sub>3</sub>OD.

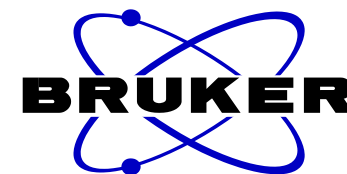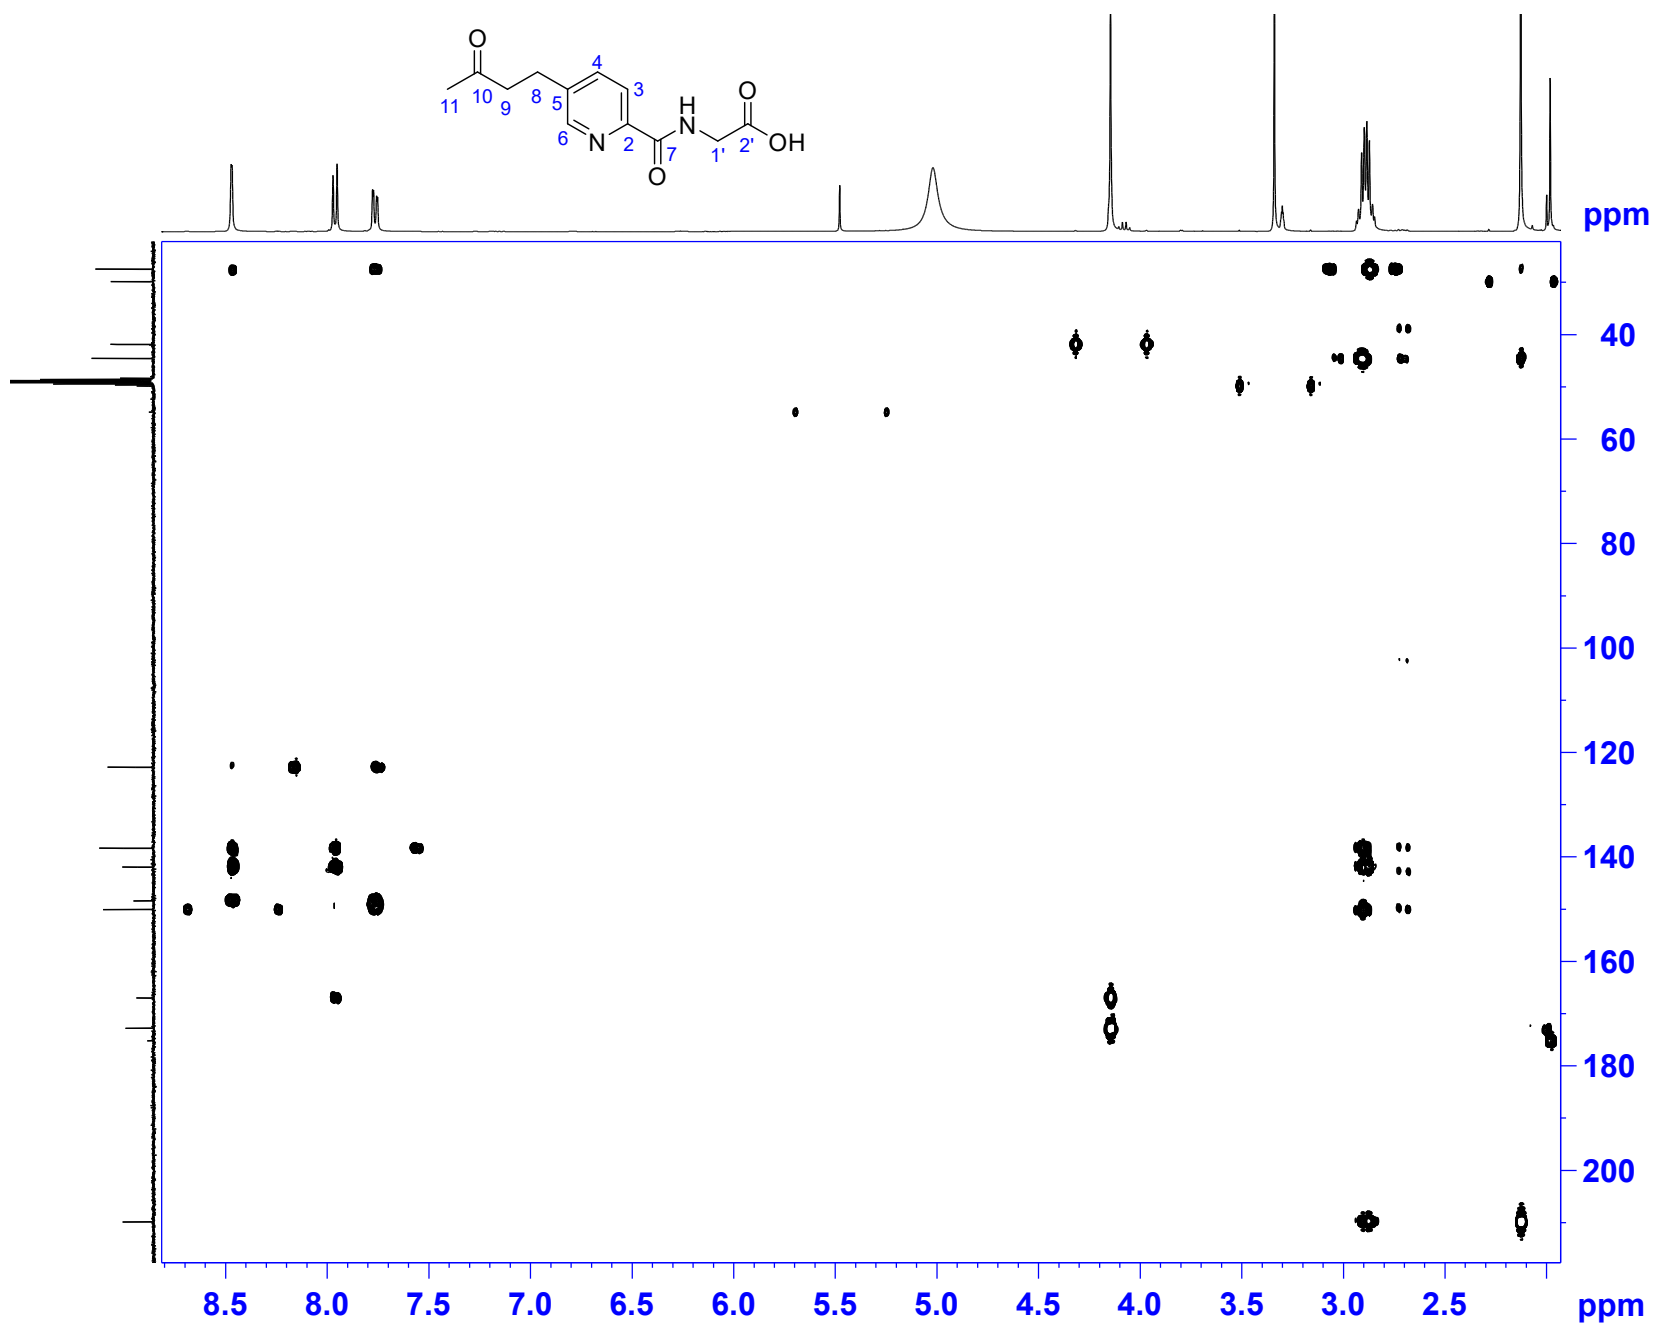

NAME ZBC-2 M 62mg  
 EXPNO 6  
 PROCNO 1  
 Date\_ 20200506  
 Time\_ 11.48  
 INSTRUM spect  
 PROBHD 5 mm PABBO BB-  
 PULPROG hmbcgpndqf  
 TD 4096  
 SOLVENT MeOD  
 NS 8  
 DS 16  
 SWH 4000.000 Hz  
 FIDRES 0.976563 Hz  
 AQ 0.5120500 sec  
 RG 203  
 DW 125.000 usec  
 DE 6.50 usec  
 TE 294.4 K  
 CNST13 8.0000000  
 D0 0.00000300 sec  
 D1 1.50000000 sec  
 D6 0.06250000 sec  
 D16 0.00020000 sec  
 IN0 0.00002260 sec

===== CHANNEL f1 =====  
 SFO1 400.1320007 MHz  
 NUC1 1H  
 P1 13.90 usec  
 P2 27.80 usec  
 ND0 2  
 TD 128  
 SFO1 100.6238 MHz  
 FIDRES 172.842926 Hz  
 SW 219.867 ppm  
 FnmODE QF  
 SI 1024  
 SF 400.1300116 MHz  
 WDW SINE  
 SSB 0  
 LB 0.00 Hz  
 GB 0  
 PC 1.40  
 SI 1024  
 MC2 QF  
 SF 100.6126358 MHz  
 WDW SINE  
 SSB 0  
 LB 0.00 Hz  
 GB 0

**Figure S13.** NOESY spectrum of compound **2** in CD<sub>3</sub>OD.

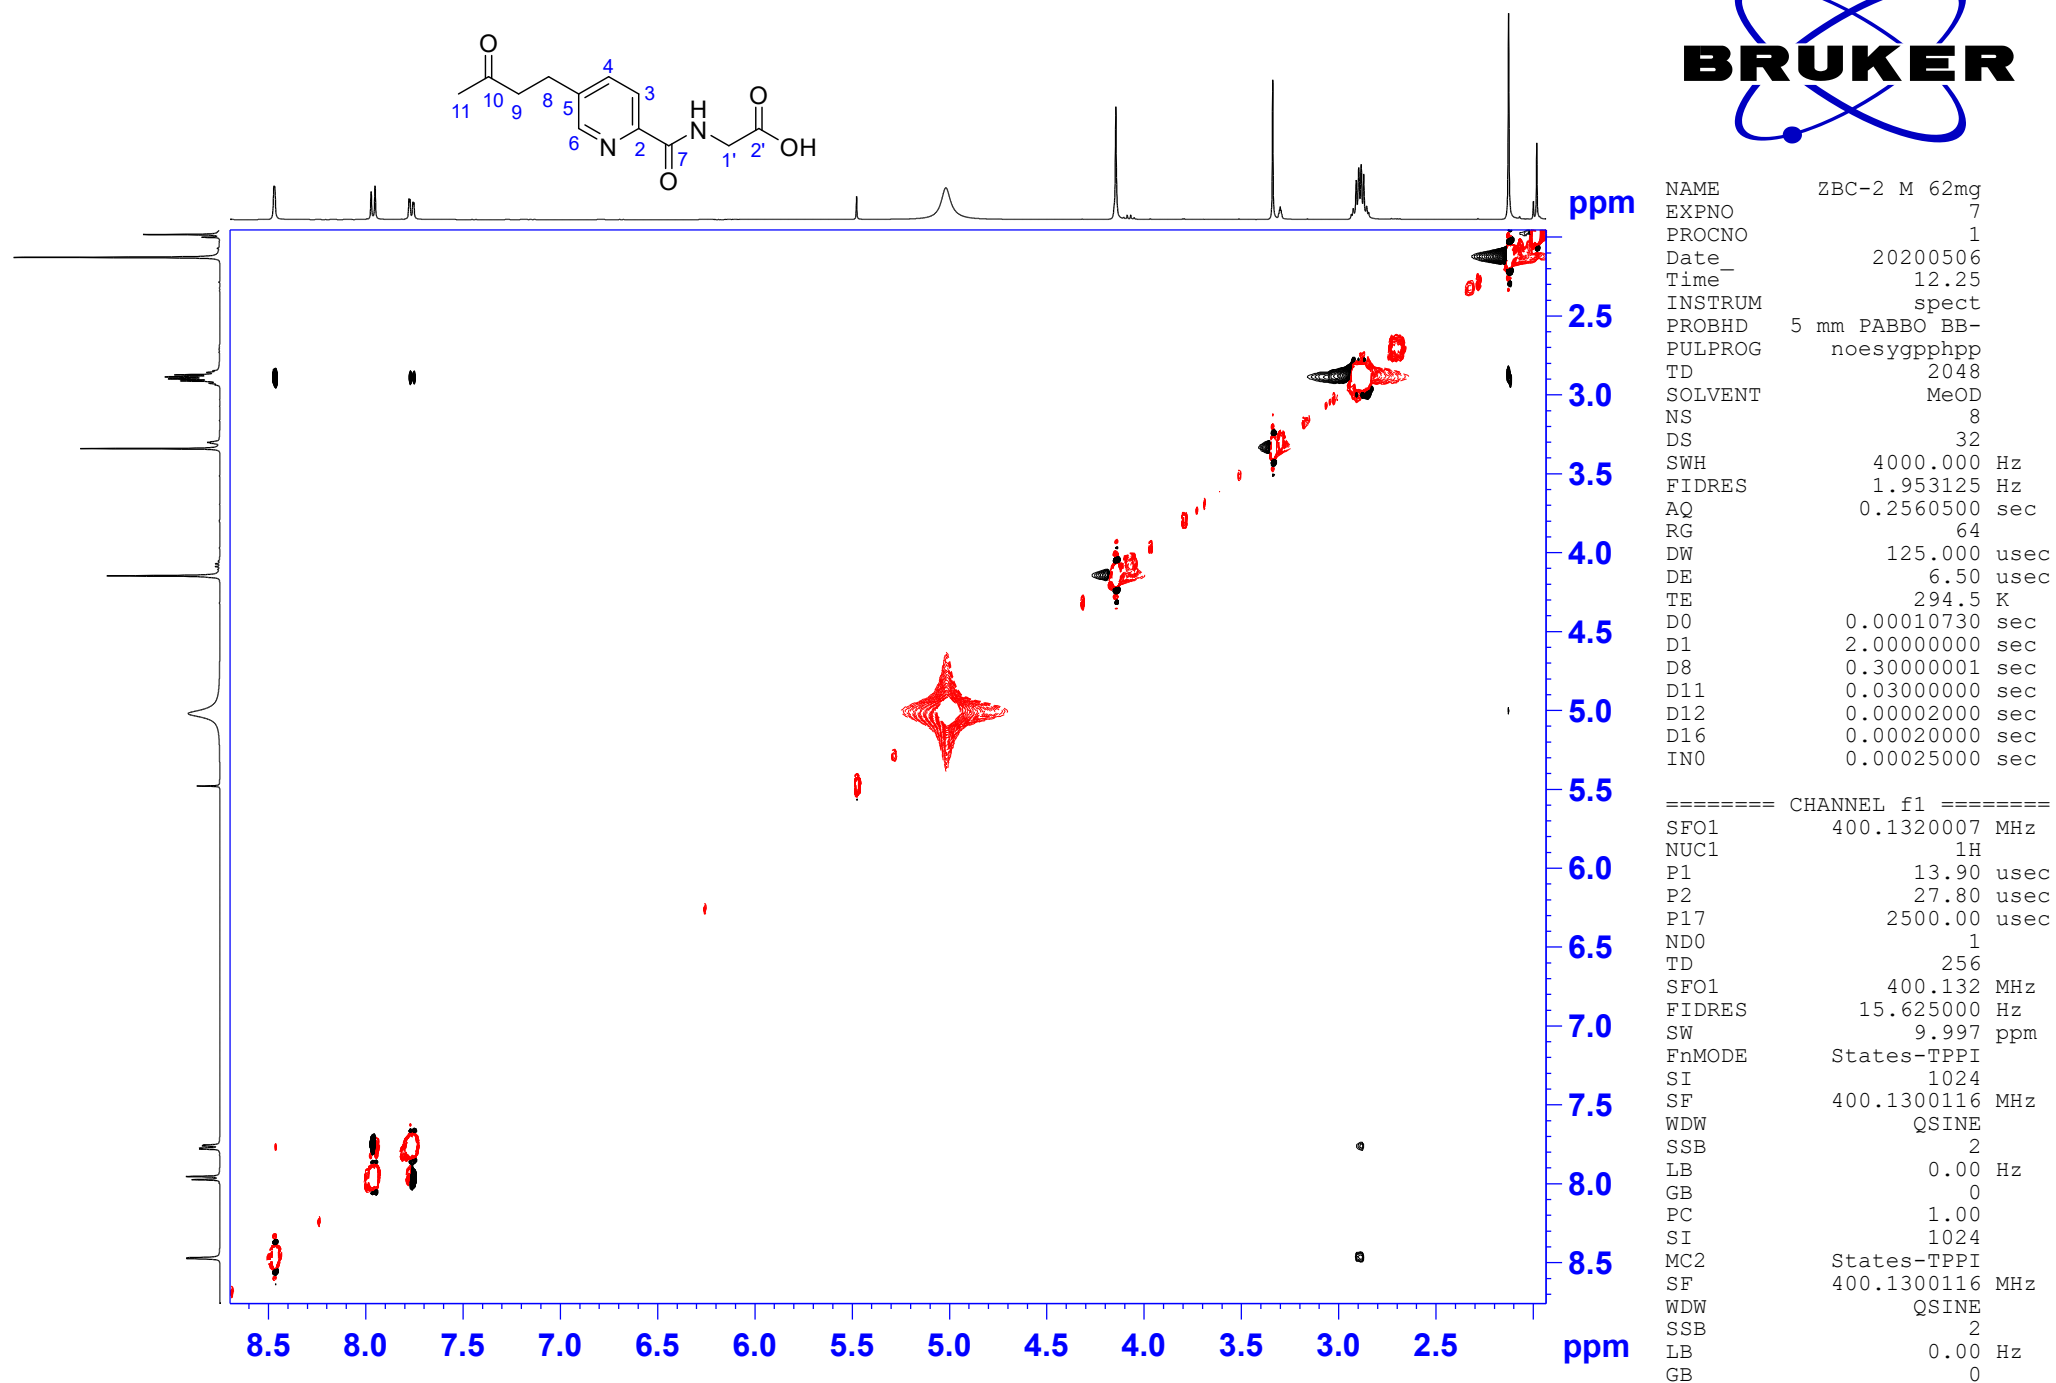

Figure S14. HRESIMS spectrum of compound 2.

Elemental Composition Report

Single Mass Analysis

Tolerance = 40.0 mDa / DBE: min = -1.5, max = 50.0

Element prediction: Off

Number of isotope peaks used for i-FIT = 3

Monoisotopic Mass, Even Electron Ions

69 formula(e) evaluated with 6 results within limits (up to 50 best isotopic matches for each mass)

Elements Used:

C: 0-13 H: 0-50 N: 0-5 O: 0-5

ZBC-2-June-2 88 (0.354) Cm (88:183)

1: TOF MS ES+

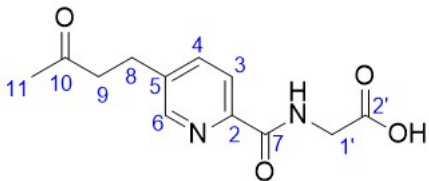

Chemical Formula: C<sub>12</sub>H<sub>15</sub>N<sub>2</sub>O<sub>4</sub><sup>+</sup>

Exact Mass: 251.1026

3.04e+007

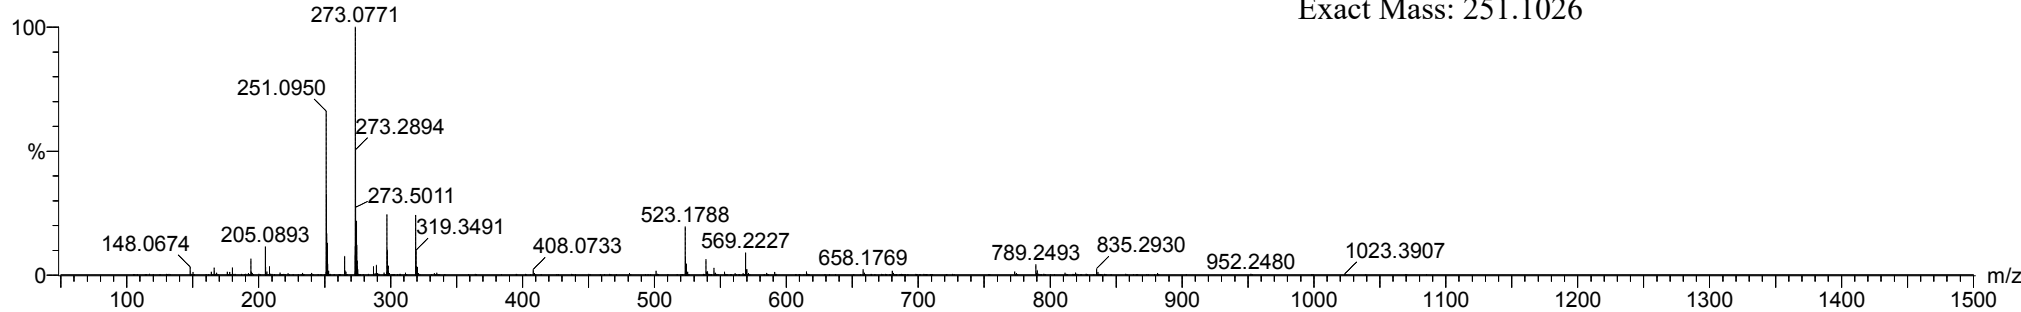

Minimum: -1.5  
Maximum: 40.0 10.0 50.0

| Mass     | Calc. Mass | mDa   | PPM   | DBE  | i-FIT  | Norm  | Conf(%) | Formula       |
|----------|------------|-------|-------|------|--------|-------|---------|---------------|
| 251.0950 | 251.0919   | 3.1   | 12.3  | 6.5  | 2224.2 | 0.761 | 46.71   | C13 H15 O5    |
|          | 251.1032   | -8.2  | -32.7 | 6.5  | 2224.8 | 1.419 | 24.19   | C12 H15 N2 O4 |
|          | 251.0569   | 38.1  | 151.7 | 12.5 | 2225.0 | 1.557 | 21.08   | C13 H7 N4 O2  |
|          | 251.0668   | 28.2  | 112.3 | 7.5  | 2226.8 | 3.395 | 3.36    | C11 H11 N2 O5 |
|          | 251.1144   | -19.4 | -77.3 | 6.5  | 2227.0 | 3.651 | 2.60    | C11 H15 N4 O3 |
|          | 251.0780   | 17.0  | 67.7  | 7.5  | 2227.3 | 3.881 | 2.06    | C10 H11 N4 O4 |

**Figure S15.**  $^1\text{H}$  NMR spectrum of compound **3** in DMSO.

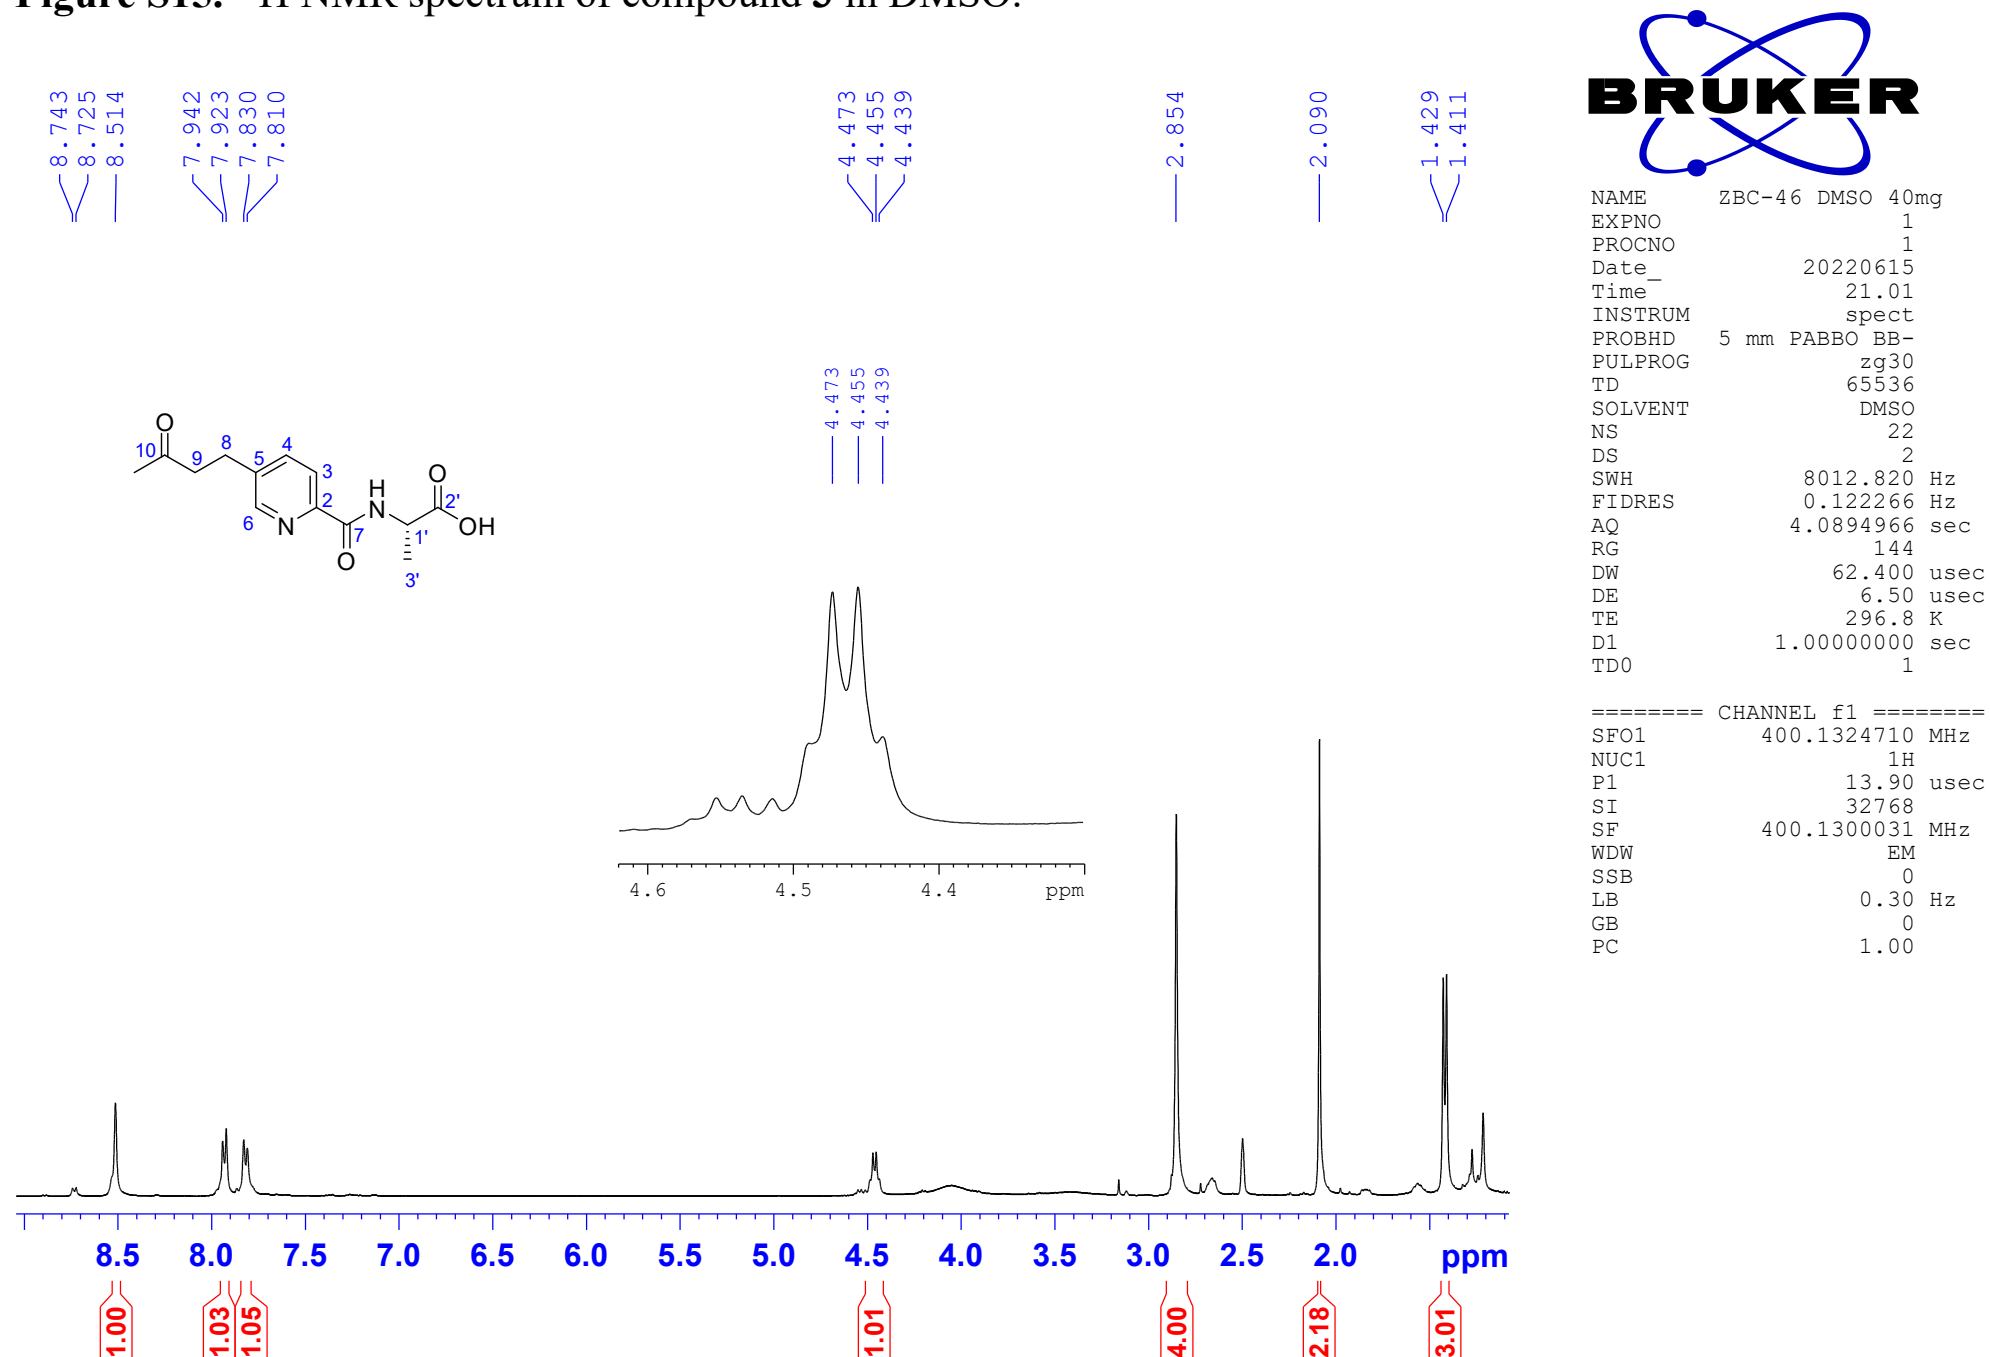

**Figure S16.**  $^{13}\text{C}$  NMR spectrum of compound **3** in DMSO.

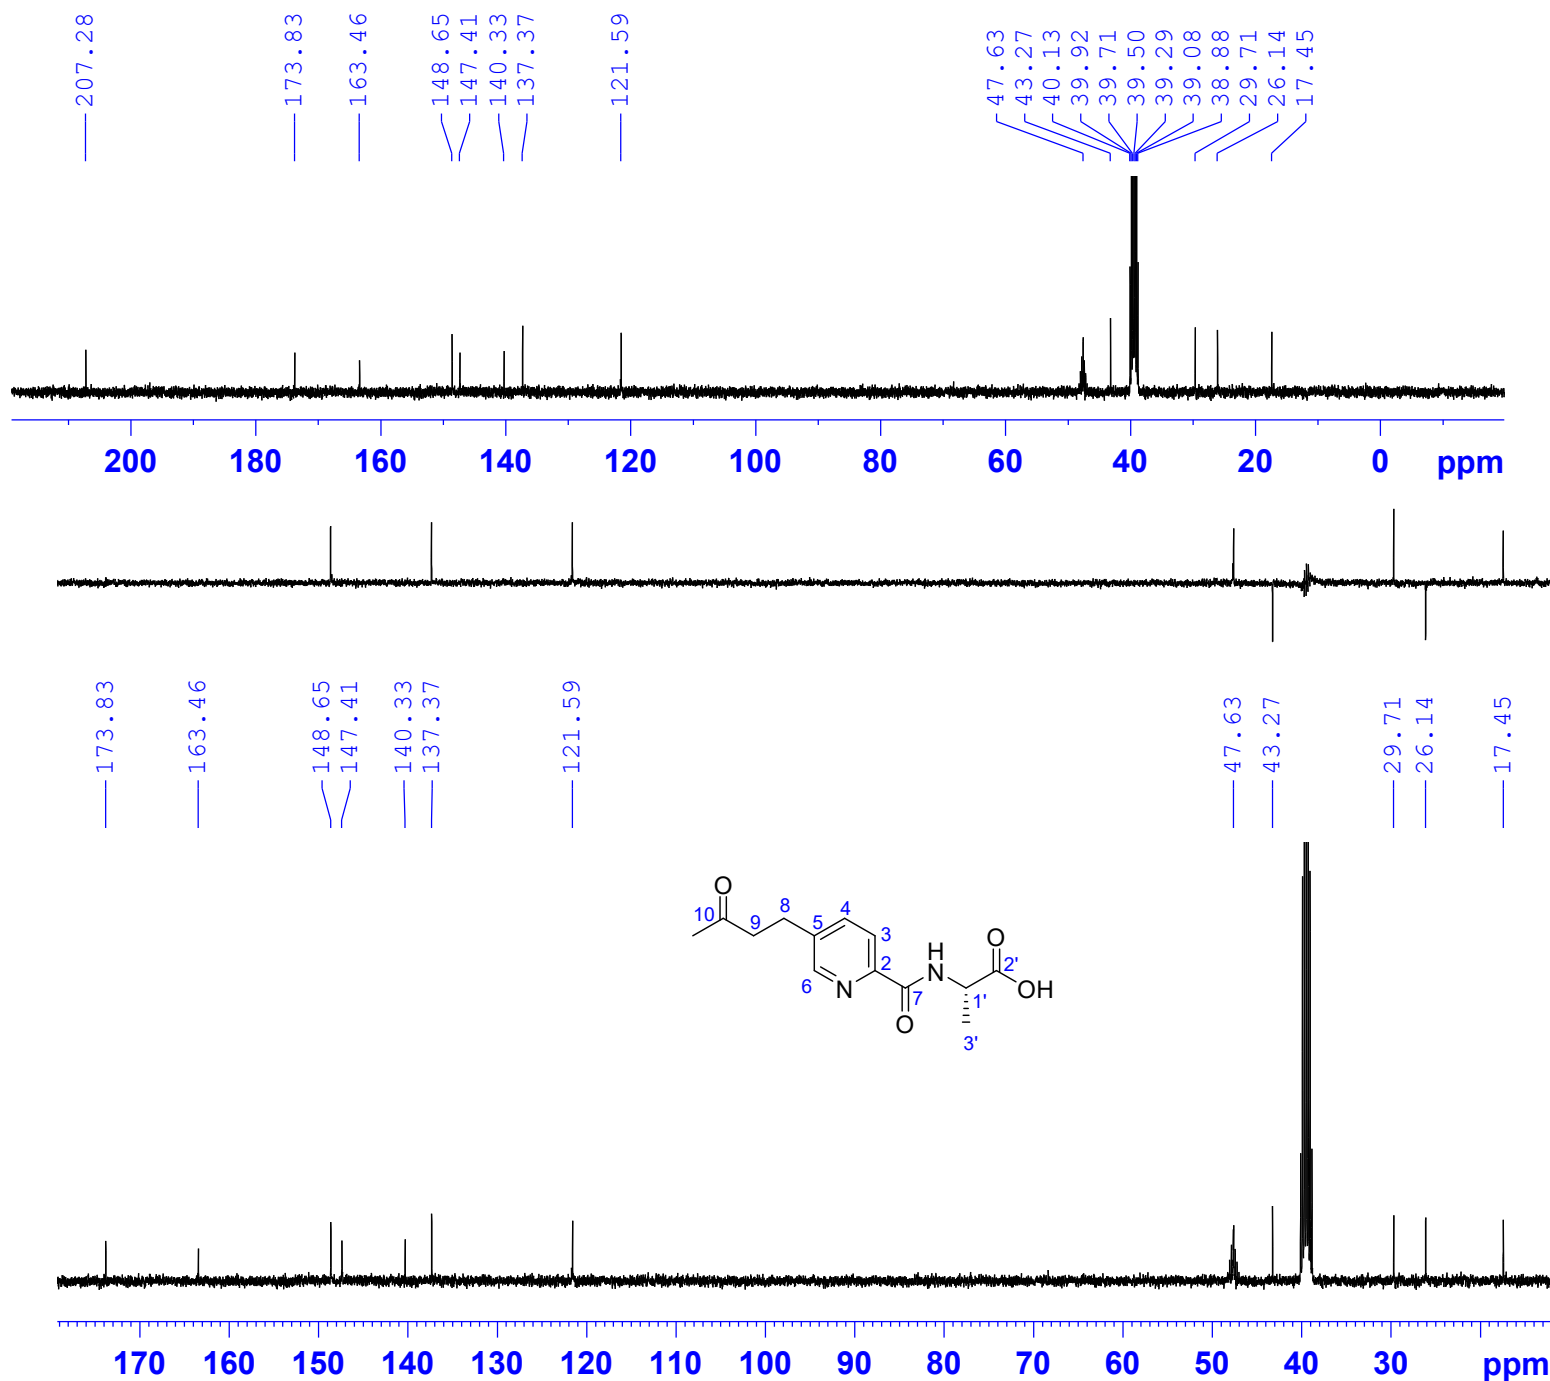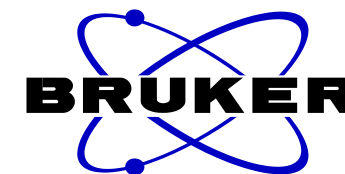

```

NAME      ZBC-46 DMSO 40mg
EXPNO      2
PROCNO     1
Date_      20220615
Time       21.04
INSTRUM    spect
PROBHD     5 mm PABBO BB-
PULPROG    zgpg30
TD         65536
SOLVENT    DMSO
NS         59
DS         4
SWH        24038.461 Hz
FIDRES     0.366798 Hz
AQ         1.3631988 sec
RG         203
DW         20.800 usec
DE         6.50 usec
TE         296.9 K
D1         2.00000000 sec
D11        0.03000000 sec
TD0        1
    
```

```

===== CHANNEL f1 =====
SFO1      100.6228293 MHz
NUC1      13C
P1        12.37 usec
SI        32768
SF        100.6128043 MHz
WDW       EM
SSB       0
LB        1.00 Hz
GB        0
PC        1.40
    
```

**Figure S17.** HSQC spectrum of compound **3** in DMSO.

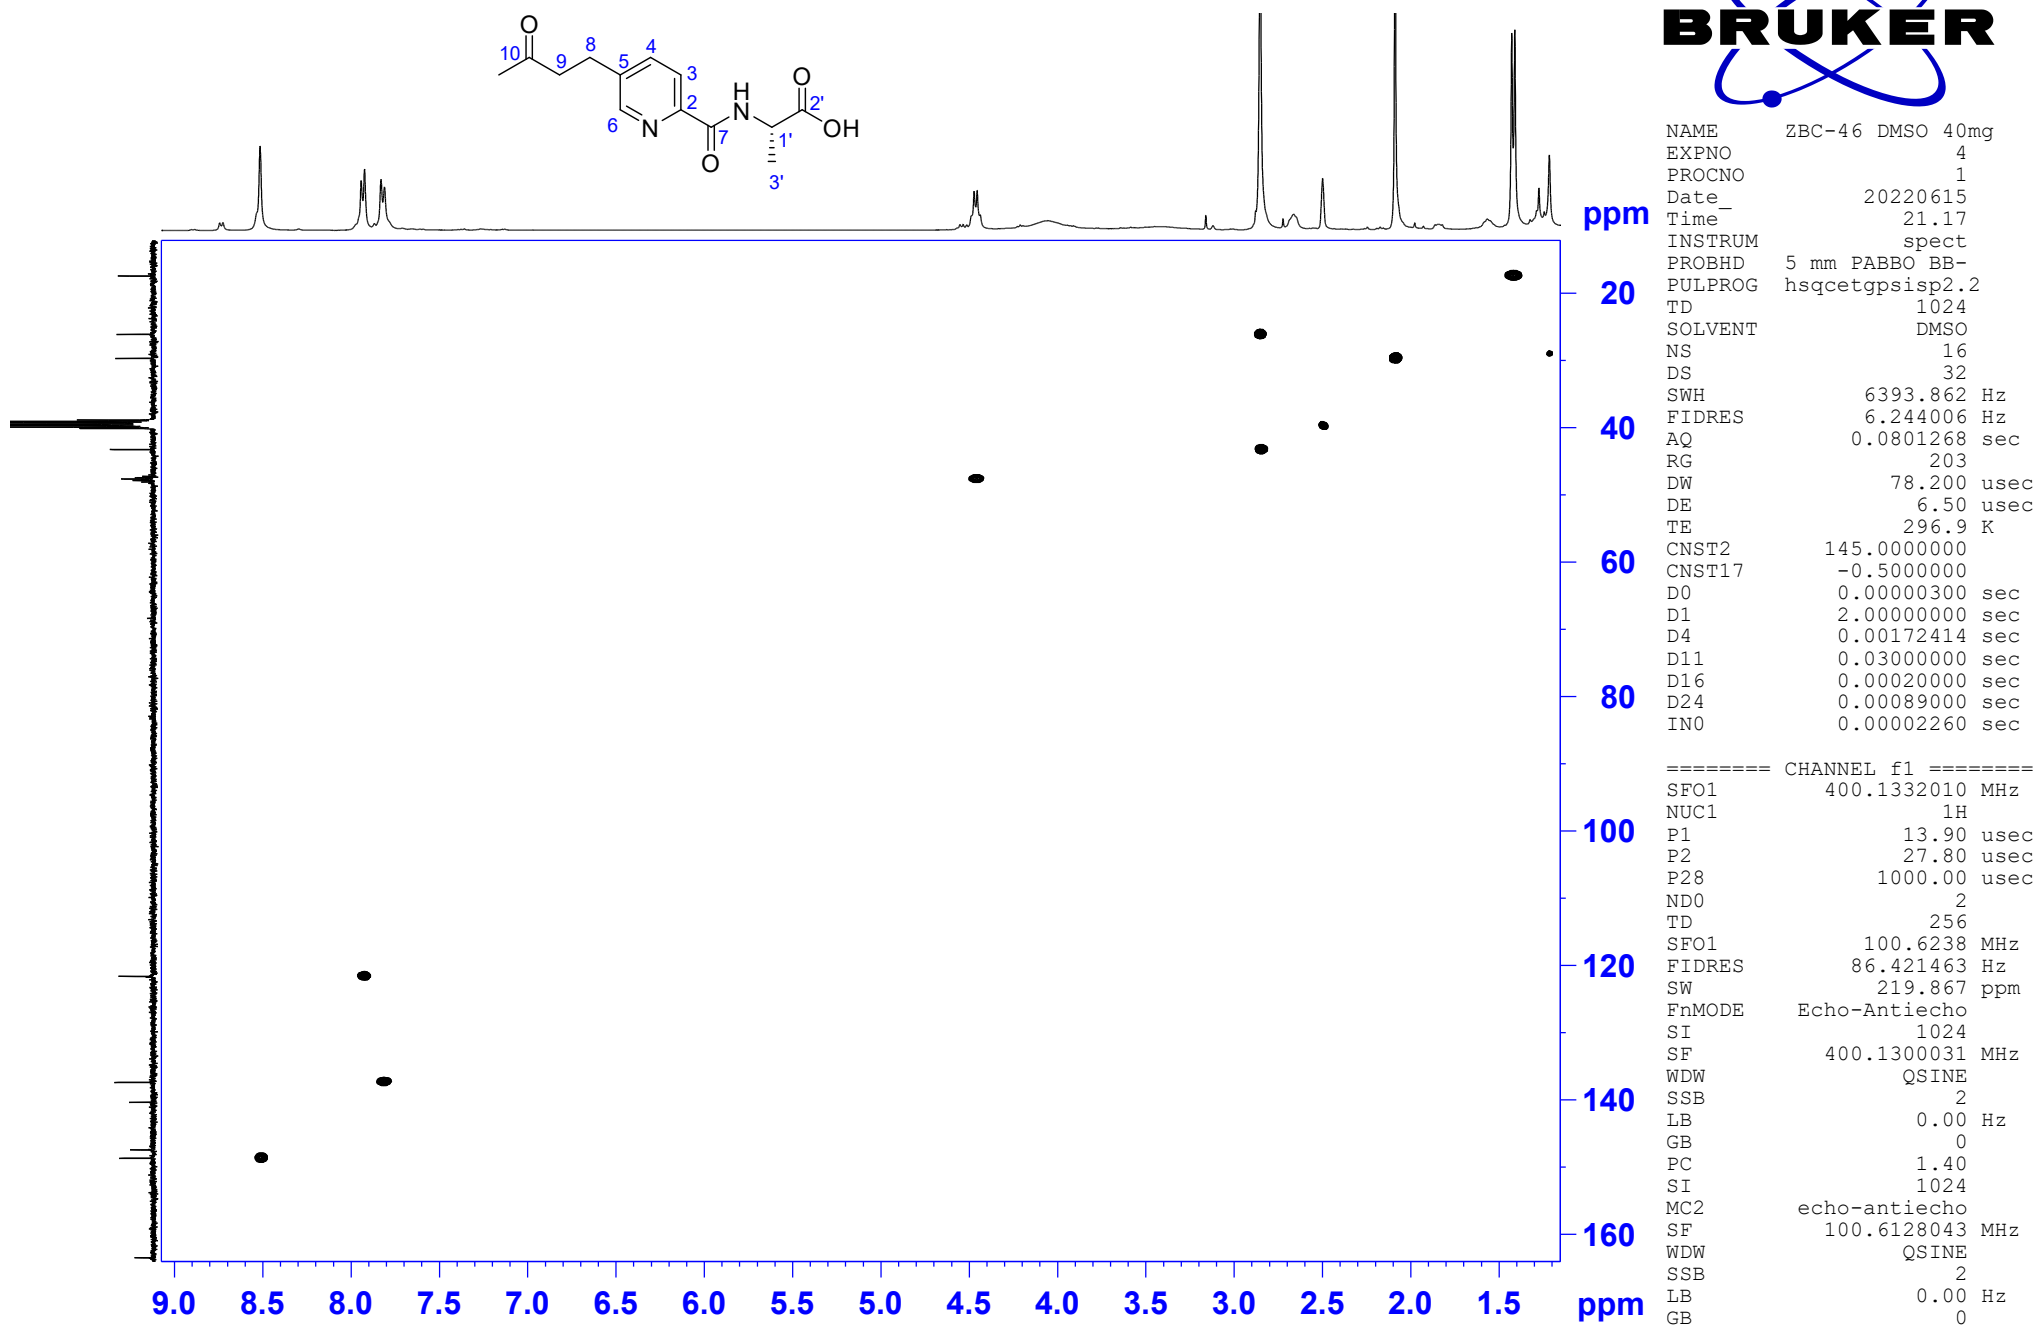



**Figure S18.**  $^1\text{H}$ – $^1\text{H}$  COSY spectrum of compound **3** in DMSO.

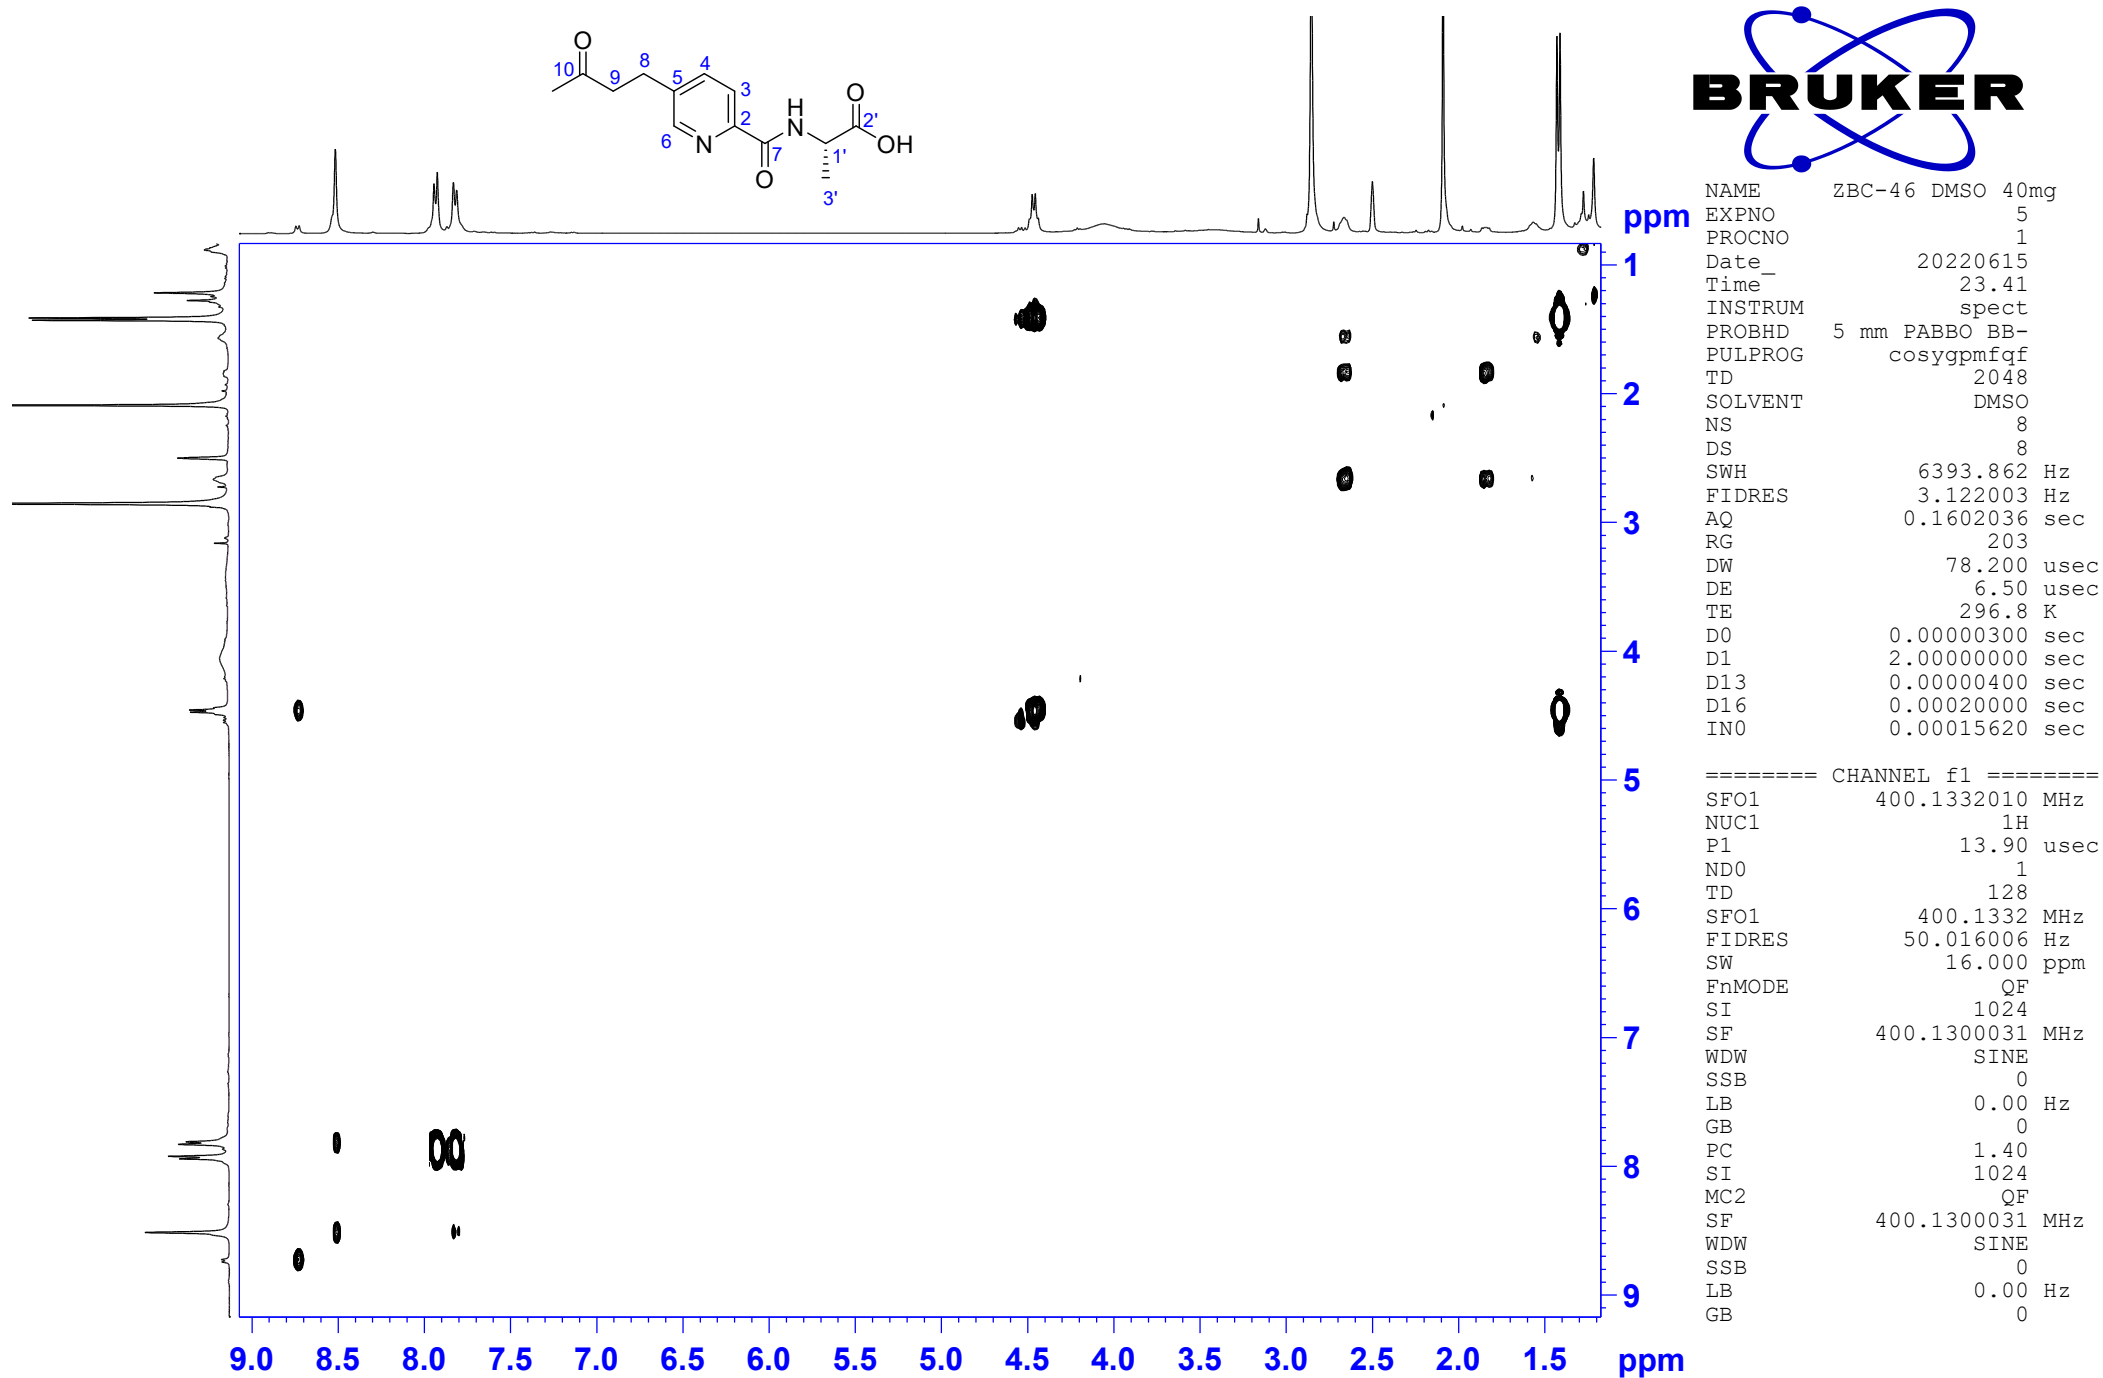

**Figure S19.** HMBC spectrum of compound **3** in DMSO.

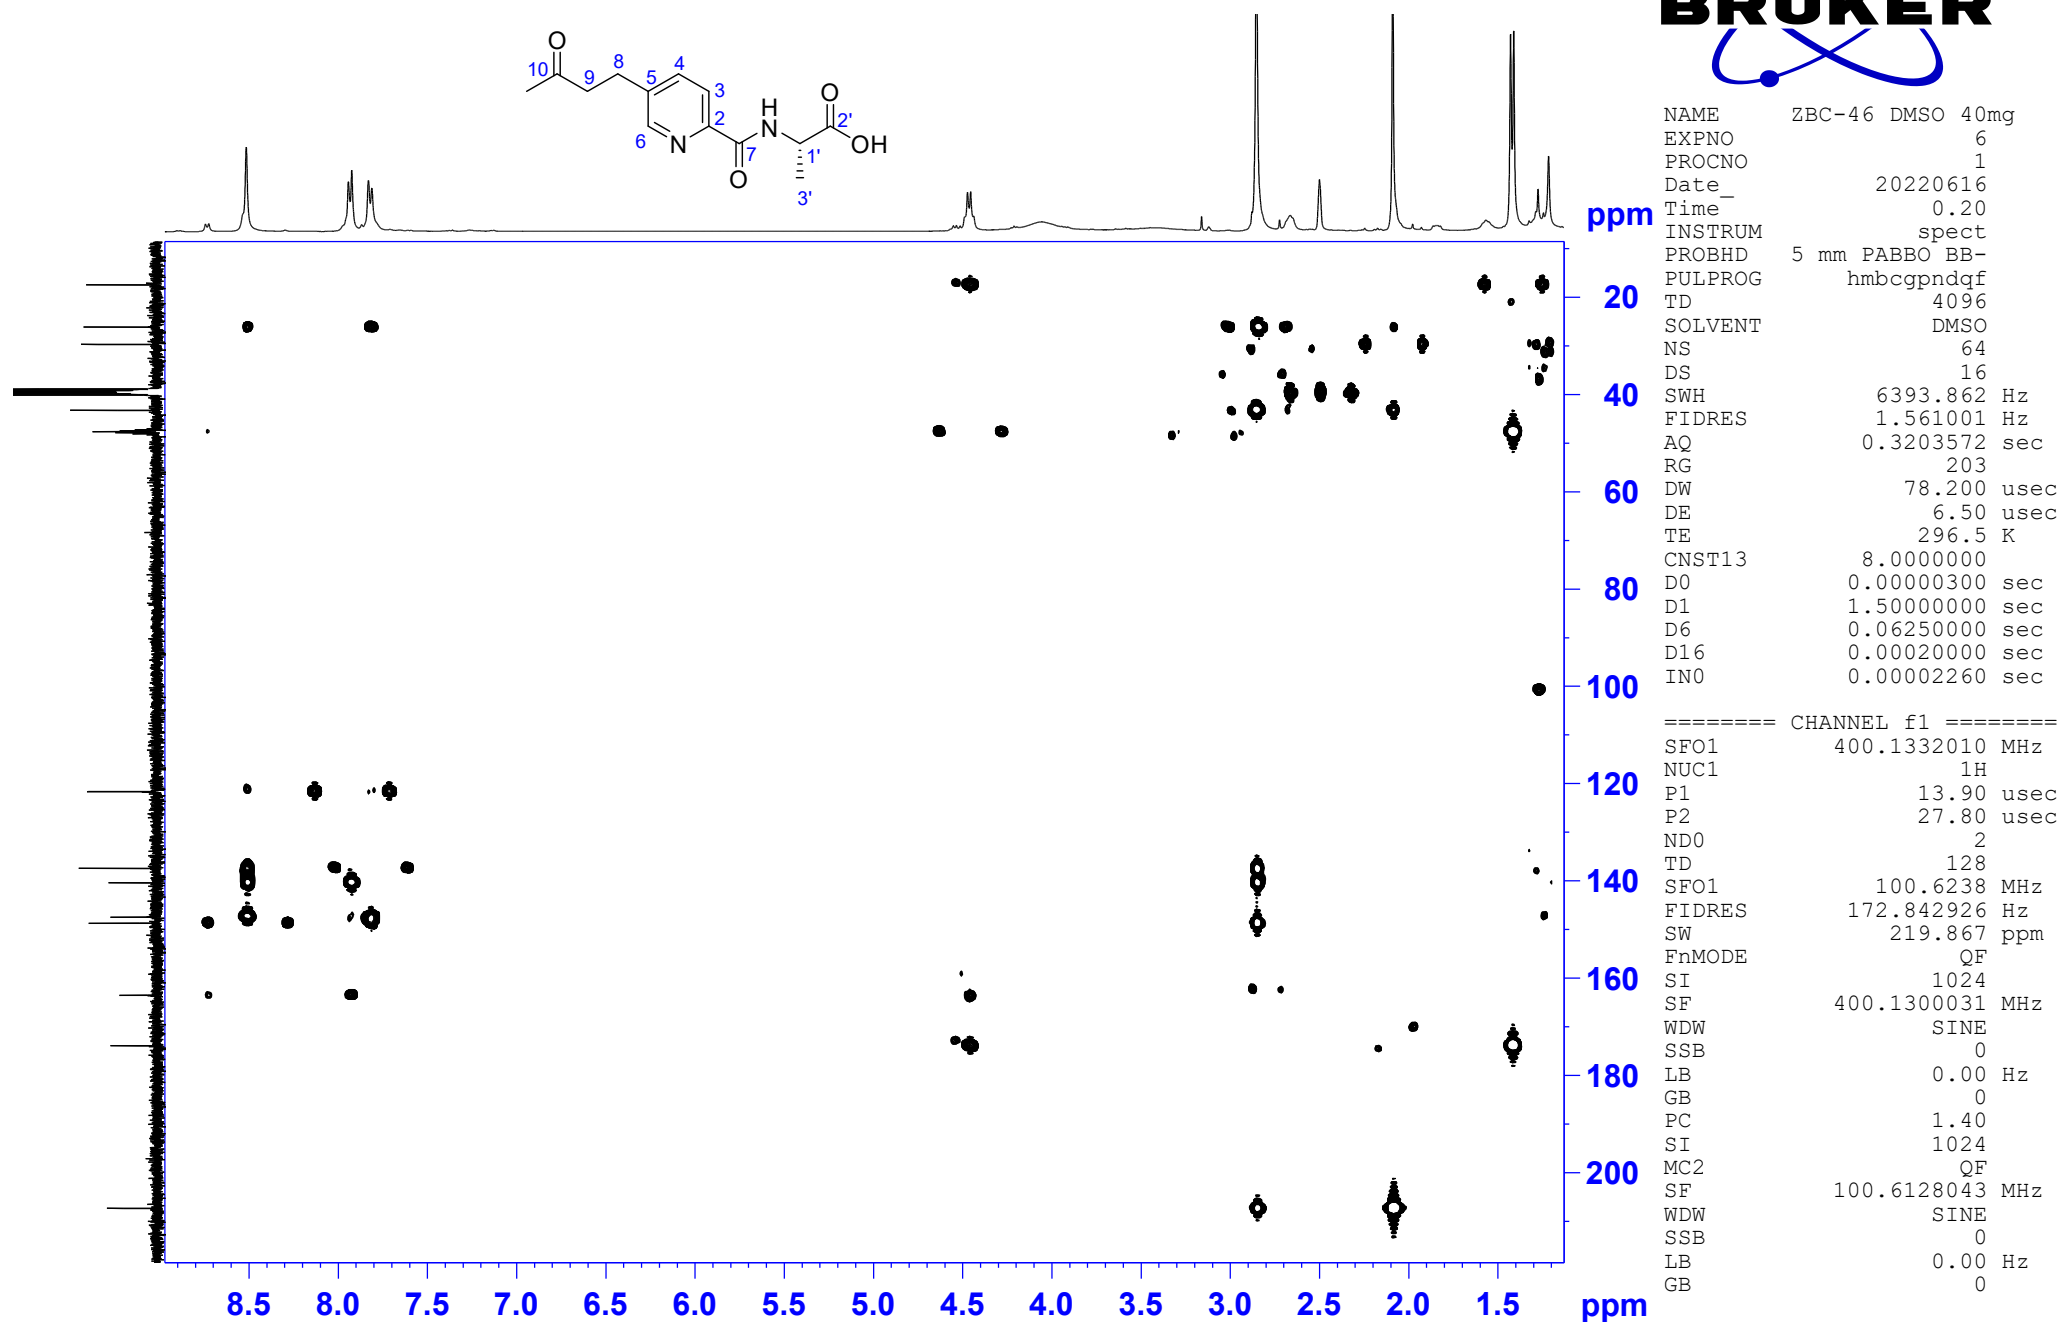

**Figure S20.** NOESY spectrum of compound **3** in DMSO.

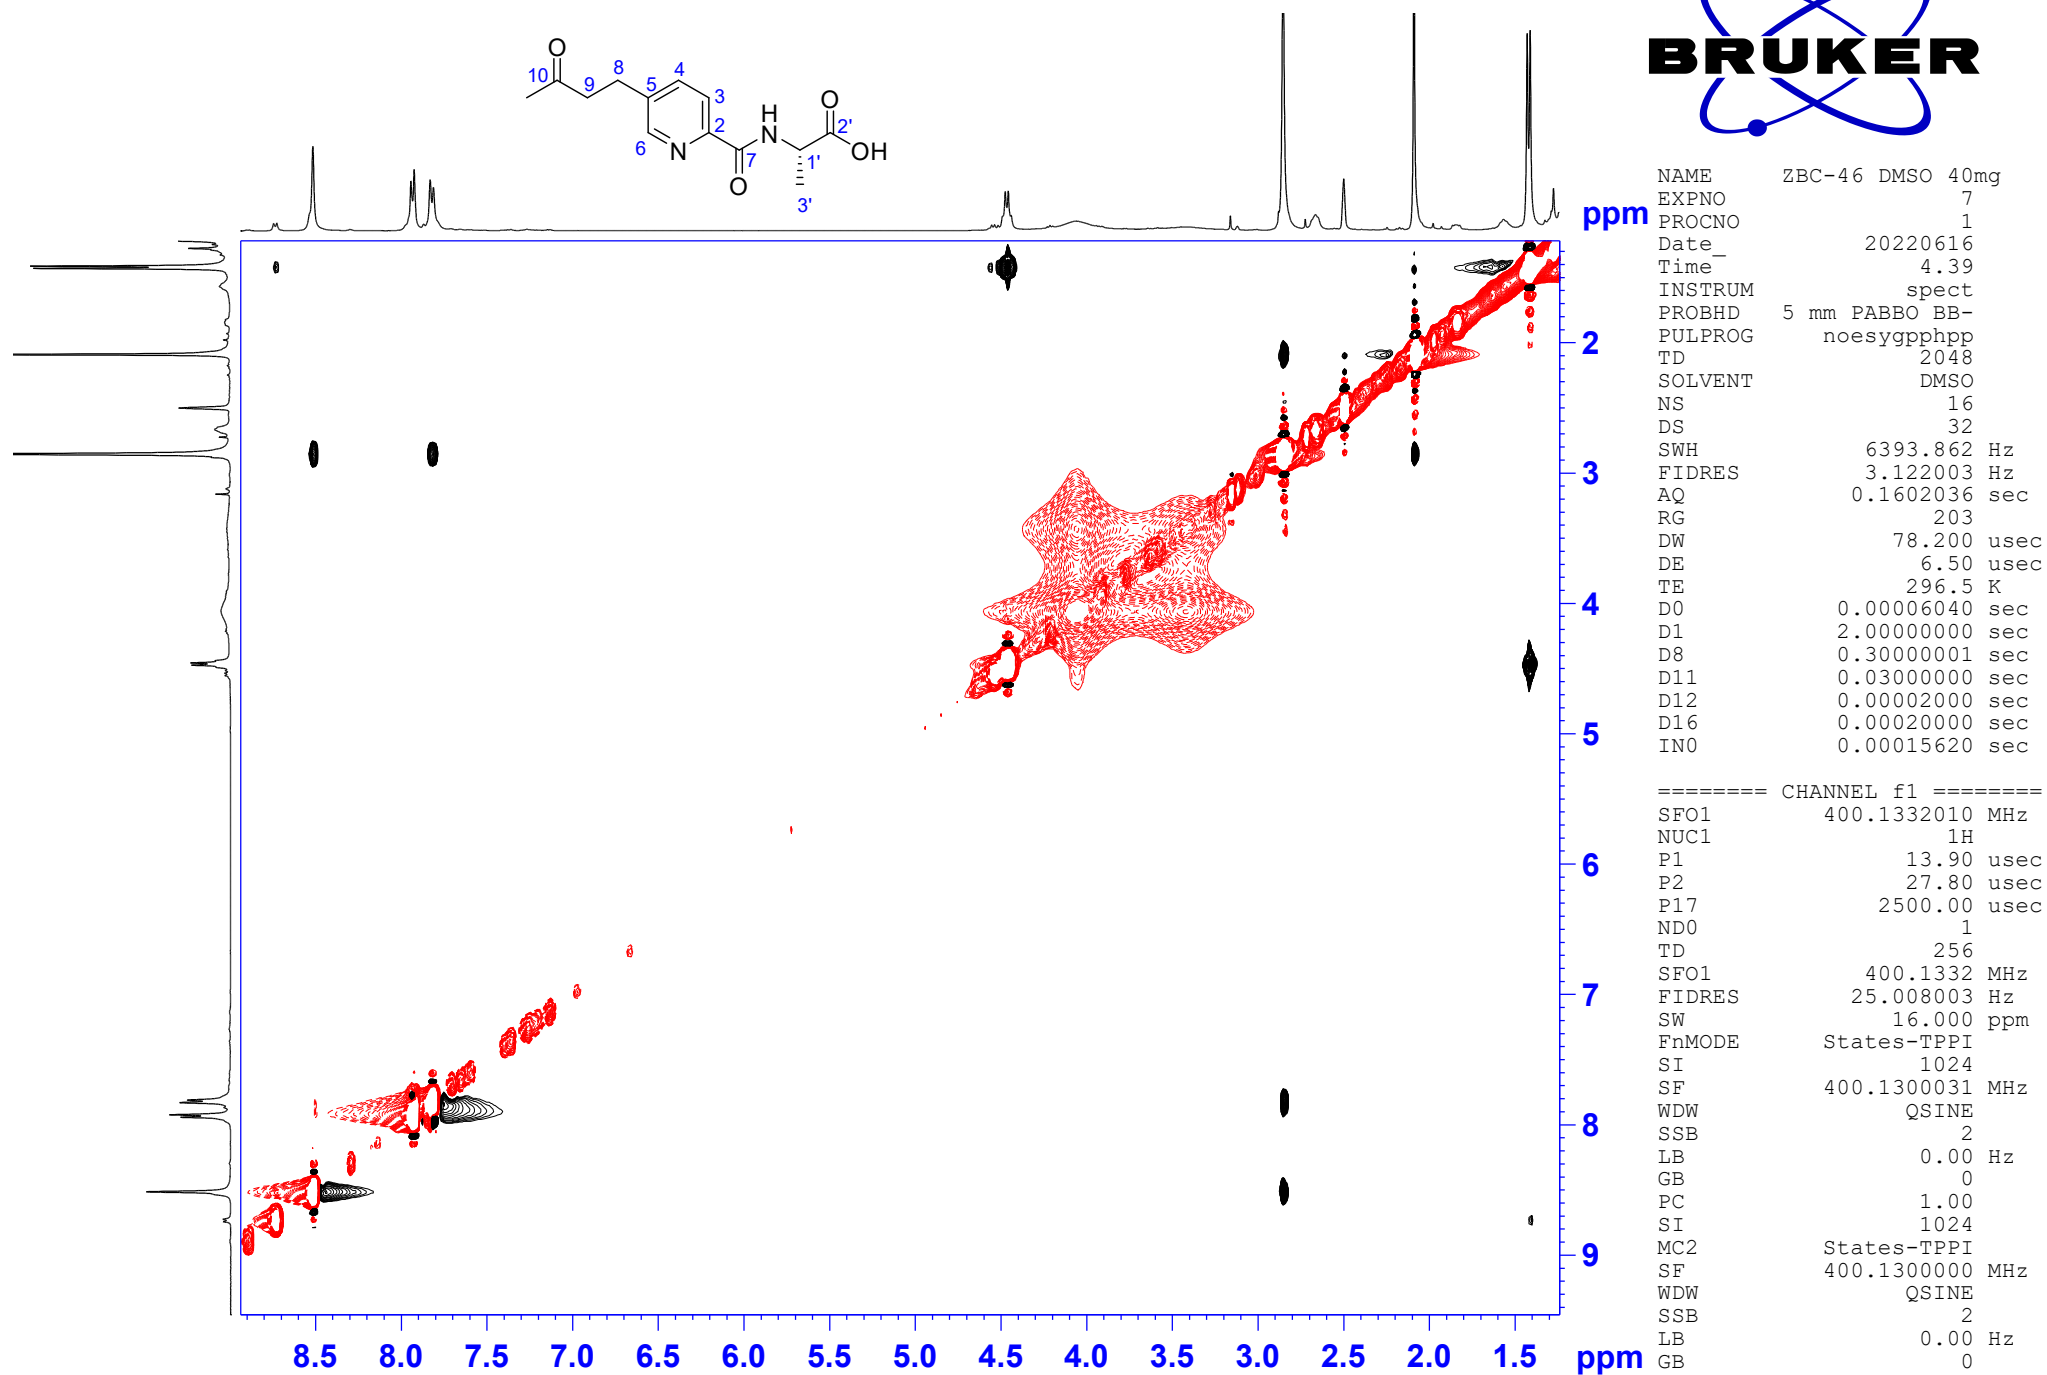

Figure S21. HRESIMS spectrum of compound 3.

Elemental Composition Report

Single Mass Analysis

Tolerance = 40.0 mDa / DBE: min = -1.5, max = 50.0

Element prediction: Off

Number of isotope peaks used for i-FIT = 3

Monoisotopic Mass, Even Electron Ions

60 formula(e) evaluated with 4 results within limits (up to 50 best isotopic matches for each mass)

Elements Used:

C: 0-13 H: 0-50 N: 0-5 O: 0-5

ZBC-46-June 120 (0.468) Cm (32:193)

1: TOF MS ES+

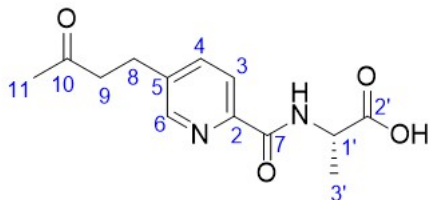

Chemical Formula: C<sub>13</sub>H<sub>17</sub>N<sub>2</sub>O<sub>4</sub><sup>+</sup>

2.62e+007

Exact Mass: 265.1183

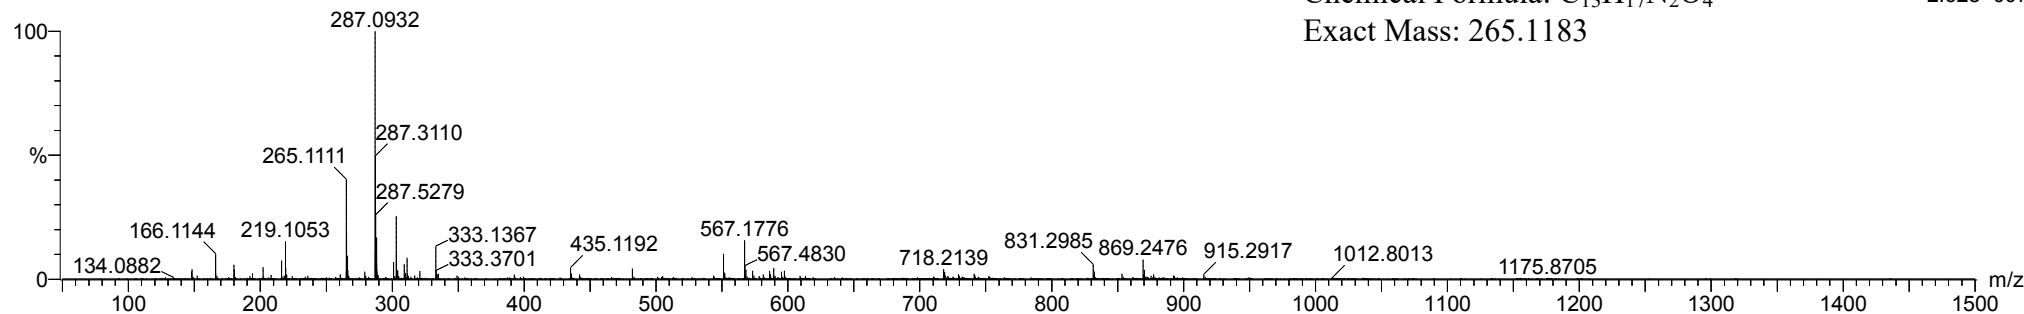

Minimum: -1.5  
Maximum: 40.0 10.0 50.0

| Mass     | Calc. Mass | mDa   | PPM   | DBE | i-FIT  | Norm  | Conf(%) | Formula       |
|----------|------------|-------|-------|-----|--------|-------|---------|---------------|
| 265.1111 | 265.1188   | -7.7  | -29.0 | 6.5 | 2329.5 | 0.498 | 60.74   | C13 H17 N2 O4 |
|          | 265.0824   | 28.7  | 108.3 | 7.5 | 2330.6 | 1.596 | 20.28   | C12 H13 N2 O5 |
|          | 265.1301   | -19.0 | -71.7 | 6.5 | 2331.3 | 2.234 | 10.71   | C12 H17 N4 O3 |
|          | 265.0937   | 17.4  | 65.6  | 7.5 | 2331.5 | 2.493 | 8.27    | C11 H13 N4 O4 |

**Figure S22.**  $^1\text{H}$  NMR spectrum of compound 4 in DMSO.

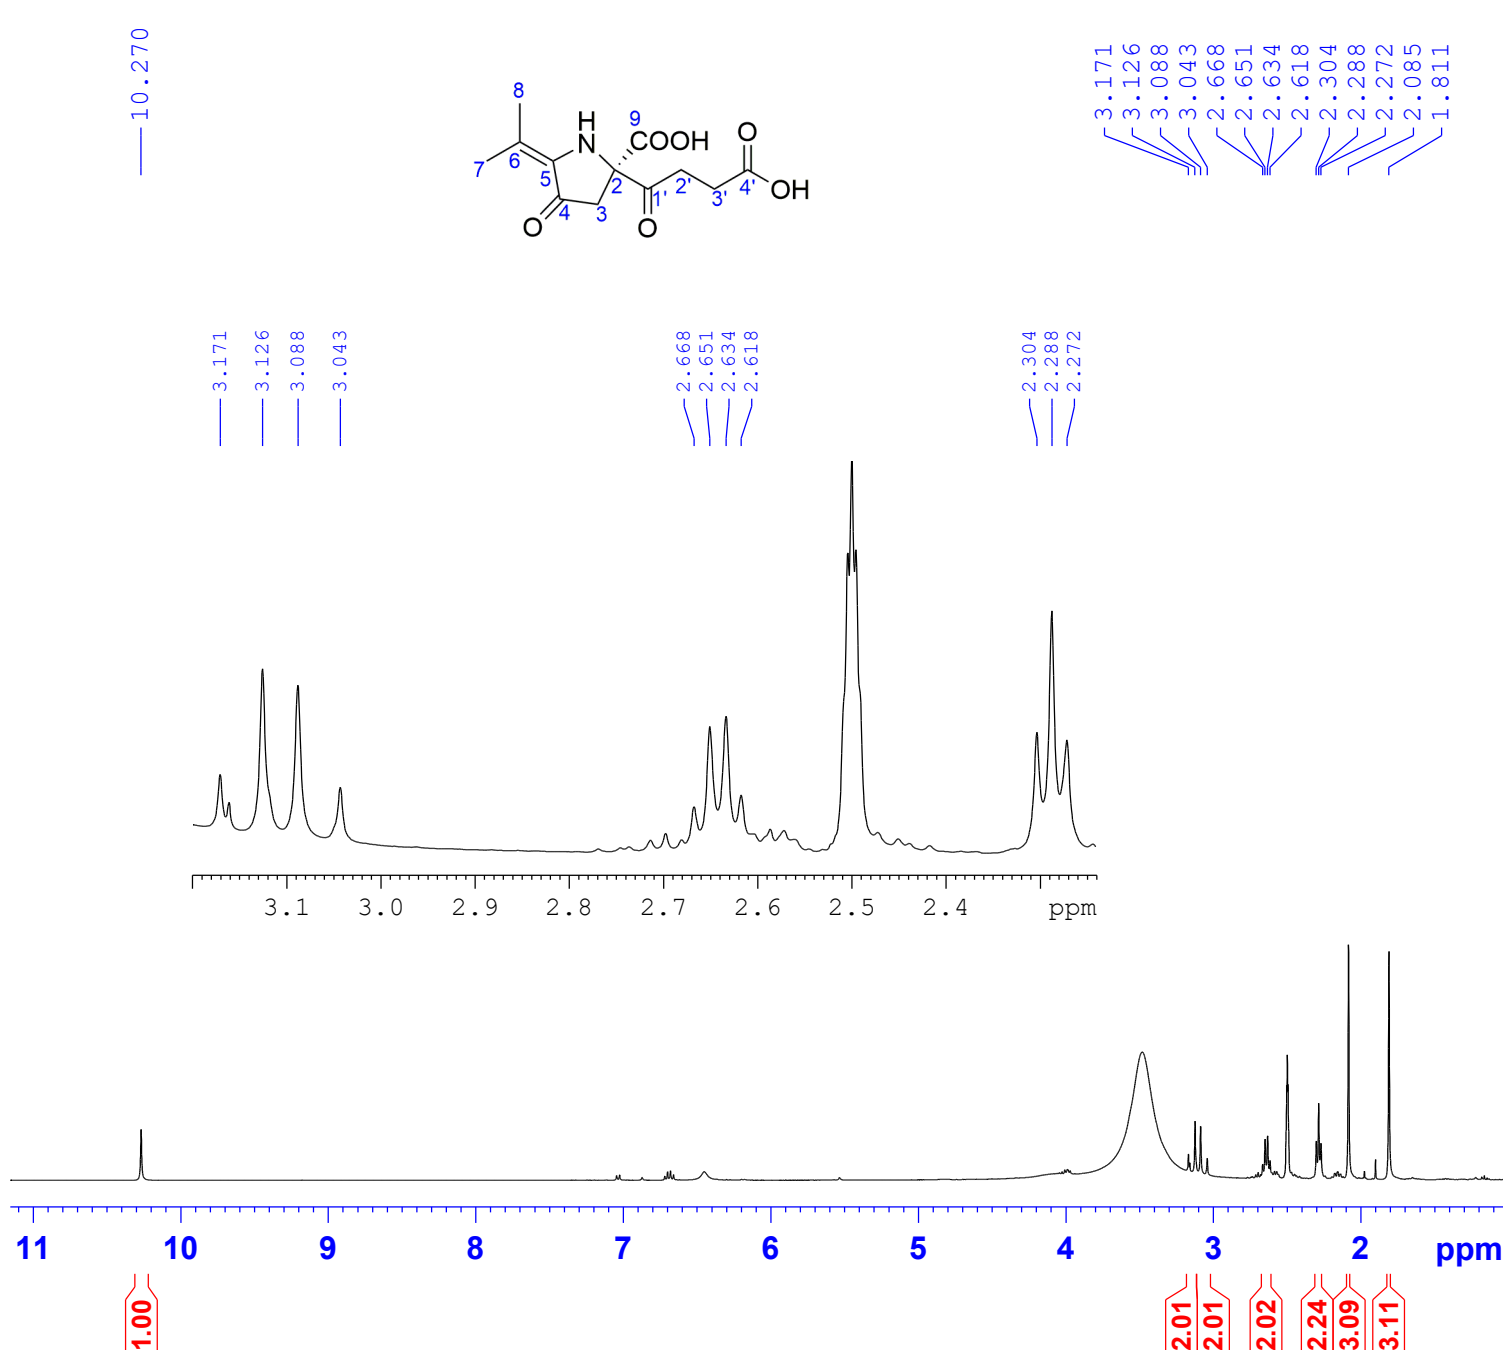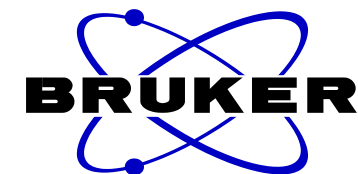

NAME ZBC-16 DMSO 11mg  
 EXPNO 1  
 PROCNO 1  
 Date\_ 20200602  
 Time\_ 21.26  
 INSTRUM spect  
 PROBHD 5 mm PABBO BB-  
 PULPROG zg30  
 TD 65536  
 SOLVENT DMSO  
 NS 44  
 DS 2  
 SWH 8012.820 Hz  
 FIDRES 0.122266 Hz  
 AQ 4.0894966 sec  
 RG 114  
 DW 62.400 usec  
 DE 6.50 usec  
 TE 297.2 K  
 D1 1.00000000 sec  
 TD0 1

===== CHANNEL f1 =====  
 SFO1 400.1324710 MHz  
 NUC1 1H  
 P1 13.90 usec  
 SI 32768  
 SF 400.1300032 MHz  
 WDW EM  
 SSB 0  
 LB 0.30 Hz  
 GB 0  
 PC 1.00

**Figure S23.**  $^{13}\text{C}$  NMR spectrum of compound **4** in DMSO.

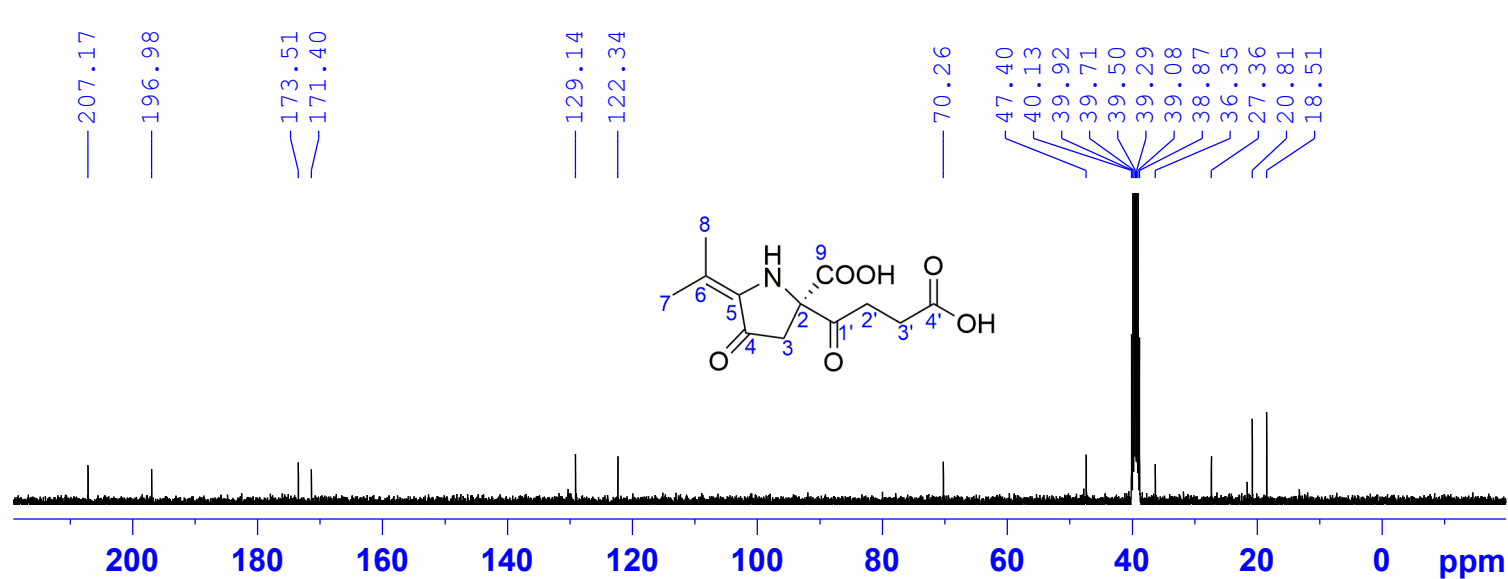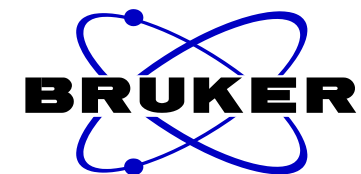

NAME ZBC-16 DMSO 11mg  
 EXPNO 2  
 PROCNO 1  
 Date\_ 20200602  
 Time\_ 21.30  
 INSTRUM spect  
 PROBHD 5 mm PABBO BB-  
 PULPROG zgpg30  
 TD 65536  
 SOLVENT DMSO  
 NS 198  
 DS 4  
 SWH 24038.461 Hz  
 FIDRES 0.366798 Hz  
 AQ 1.3631988 sec  
 RG 203  
 DW 20.800 usec  
 DE 6.50 usec  
 TE 297.5 K  
 D1 2.00000000 sec  
 D11 0.03000000 sec  
 TD0 1

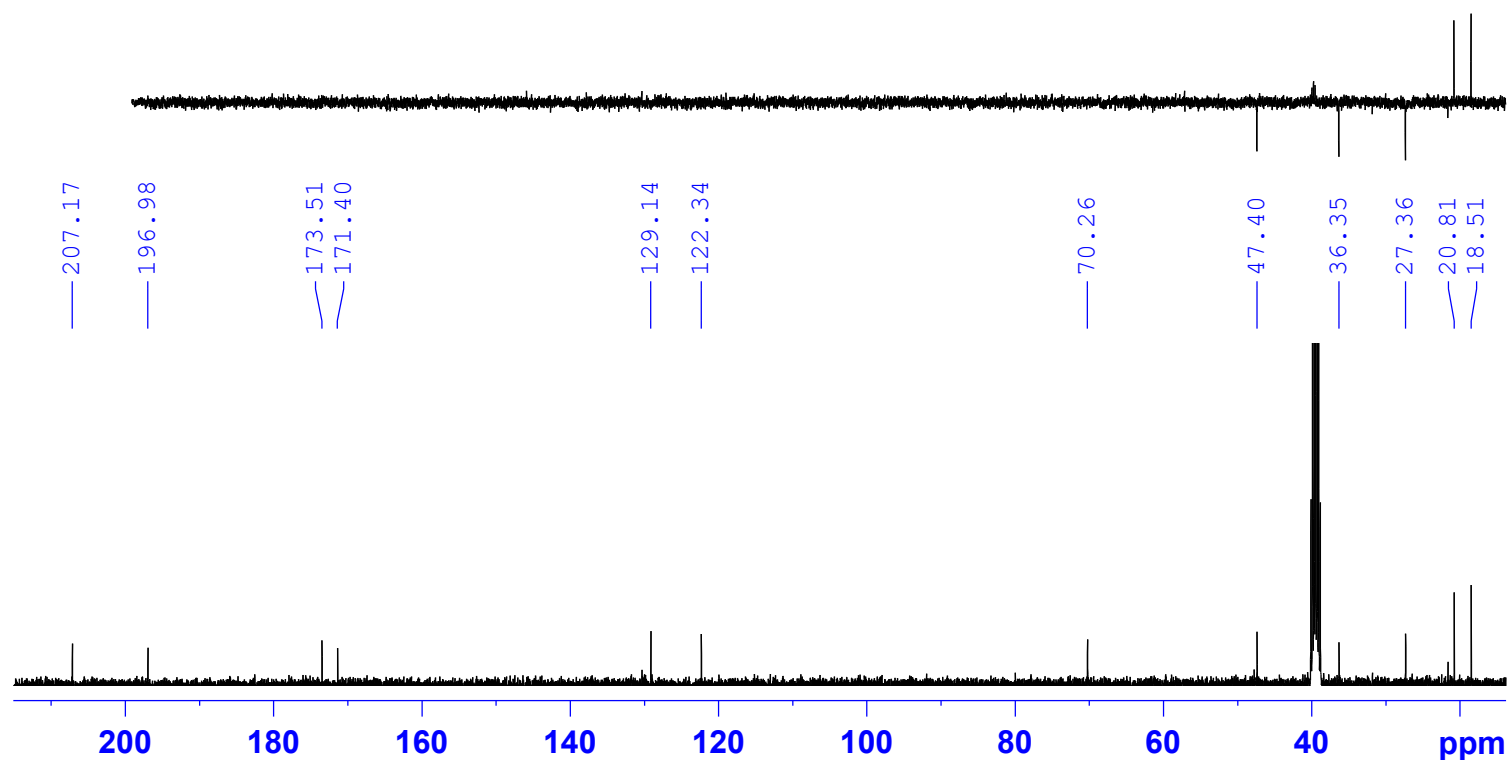

===== CHANNEL f1 =====  
 SF01 100.6228293 MHz  
 NUC1 13C  
 P1 12.37 usec  
 SI 32768  
 SF 100.6128040 MHz  
 WDW EM  
 SSB 0  
 LB 1.00 Hz  
 GB 0  
 PC 1.40

**Figure S24.** HSQC spectrum of compound **4** in DMSO.

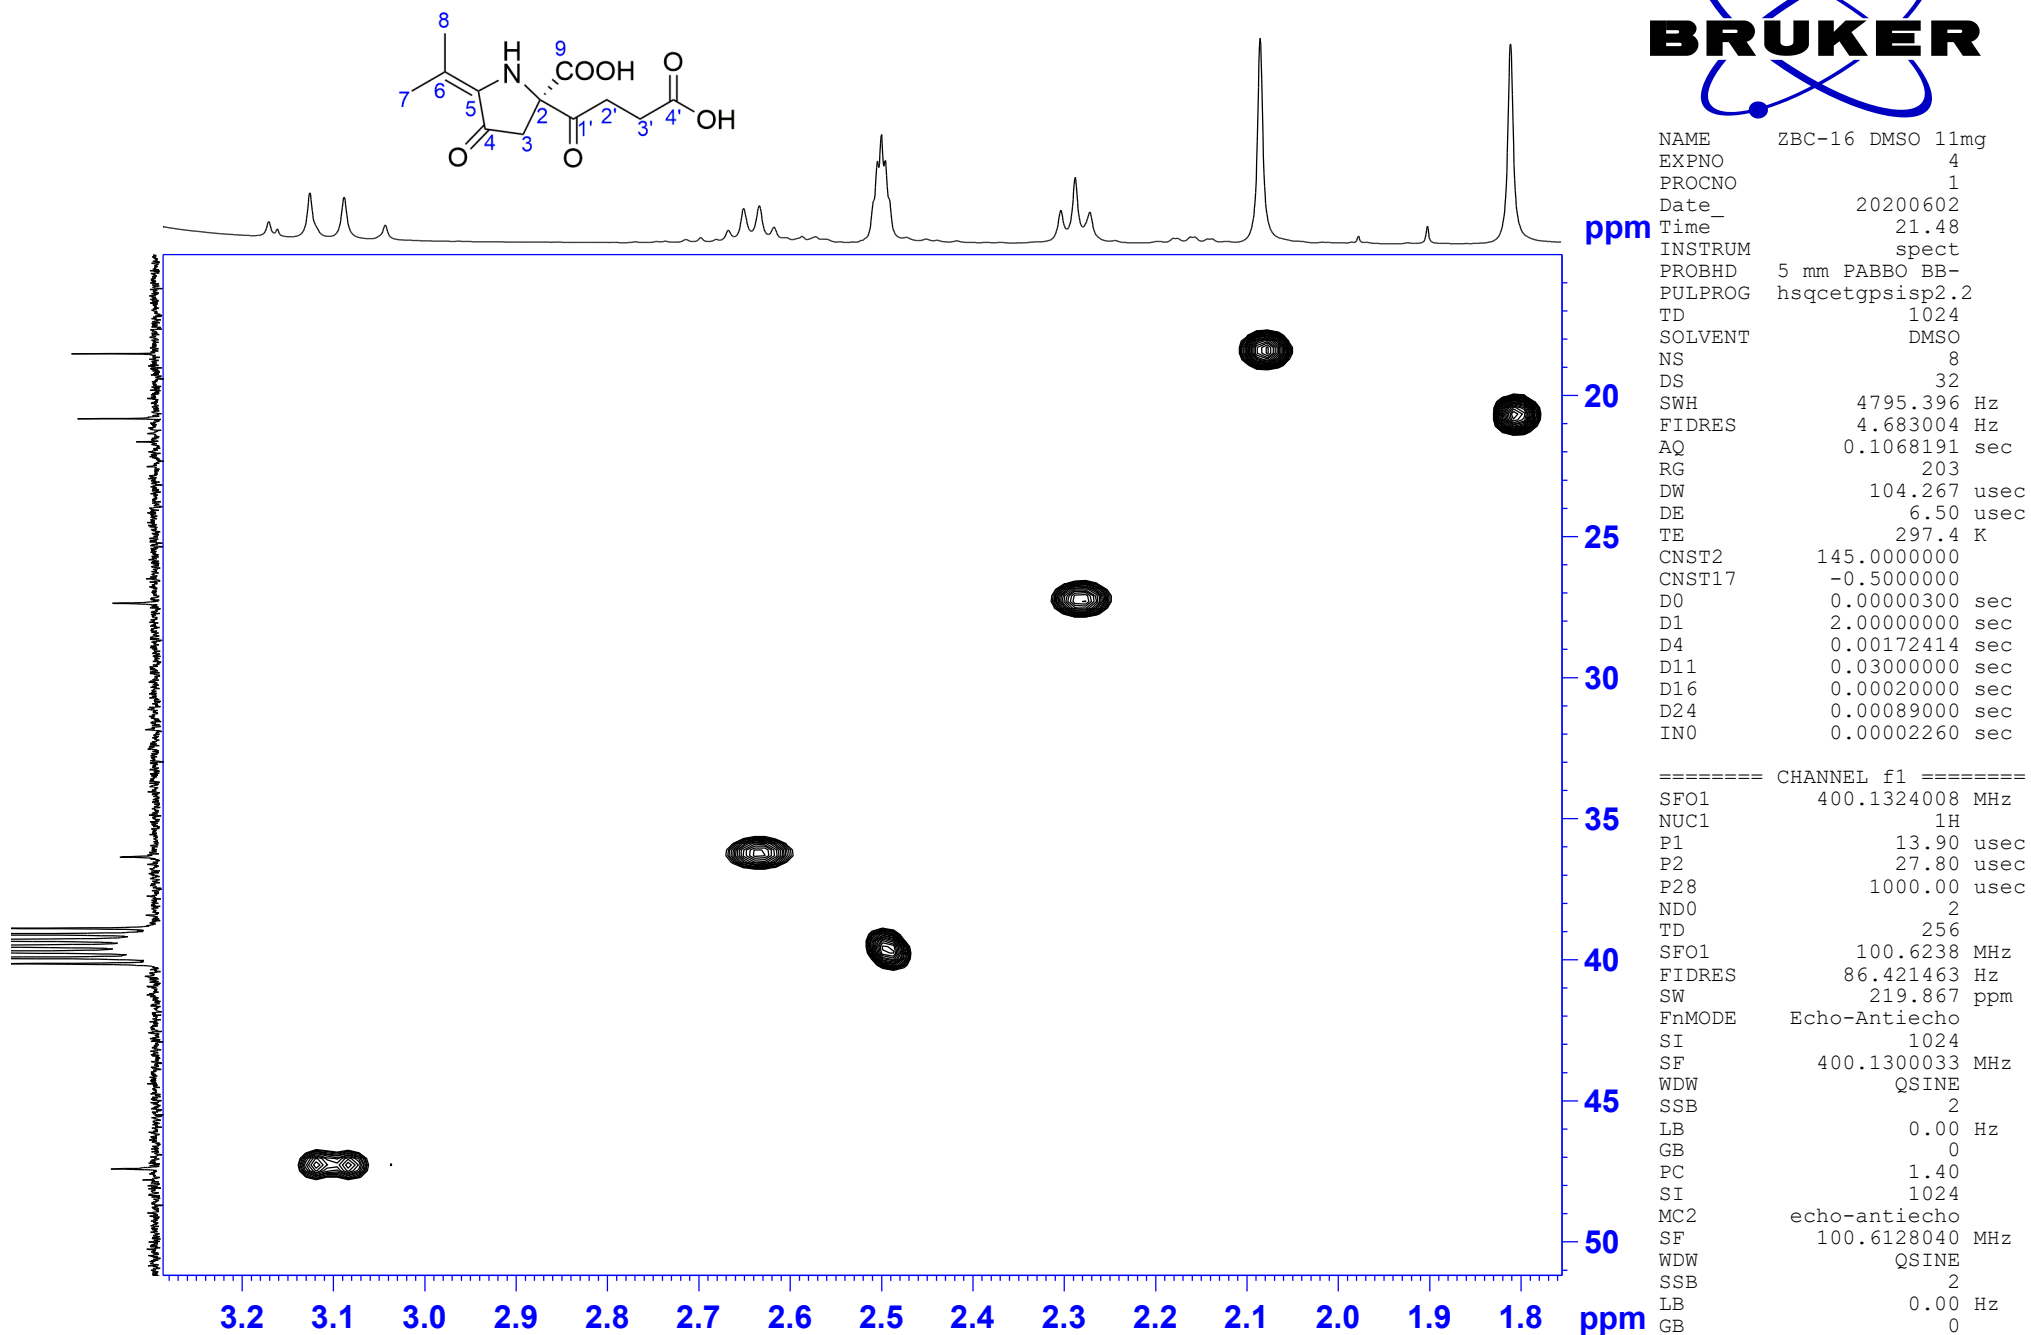

**Figure S25.**  $^1\text{H}$ – $^1\text{H}$  COSY spectrum of compound **4** in DMSO.

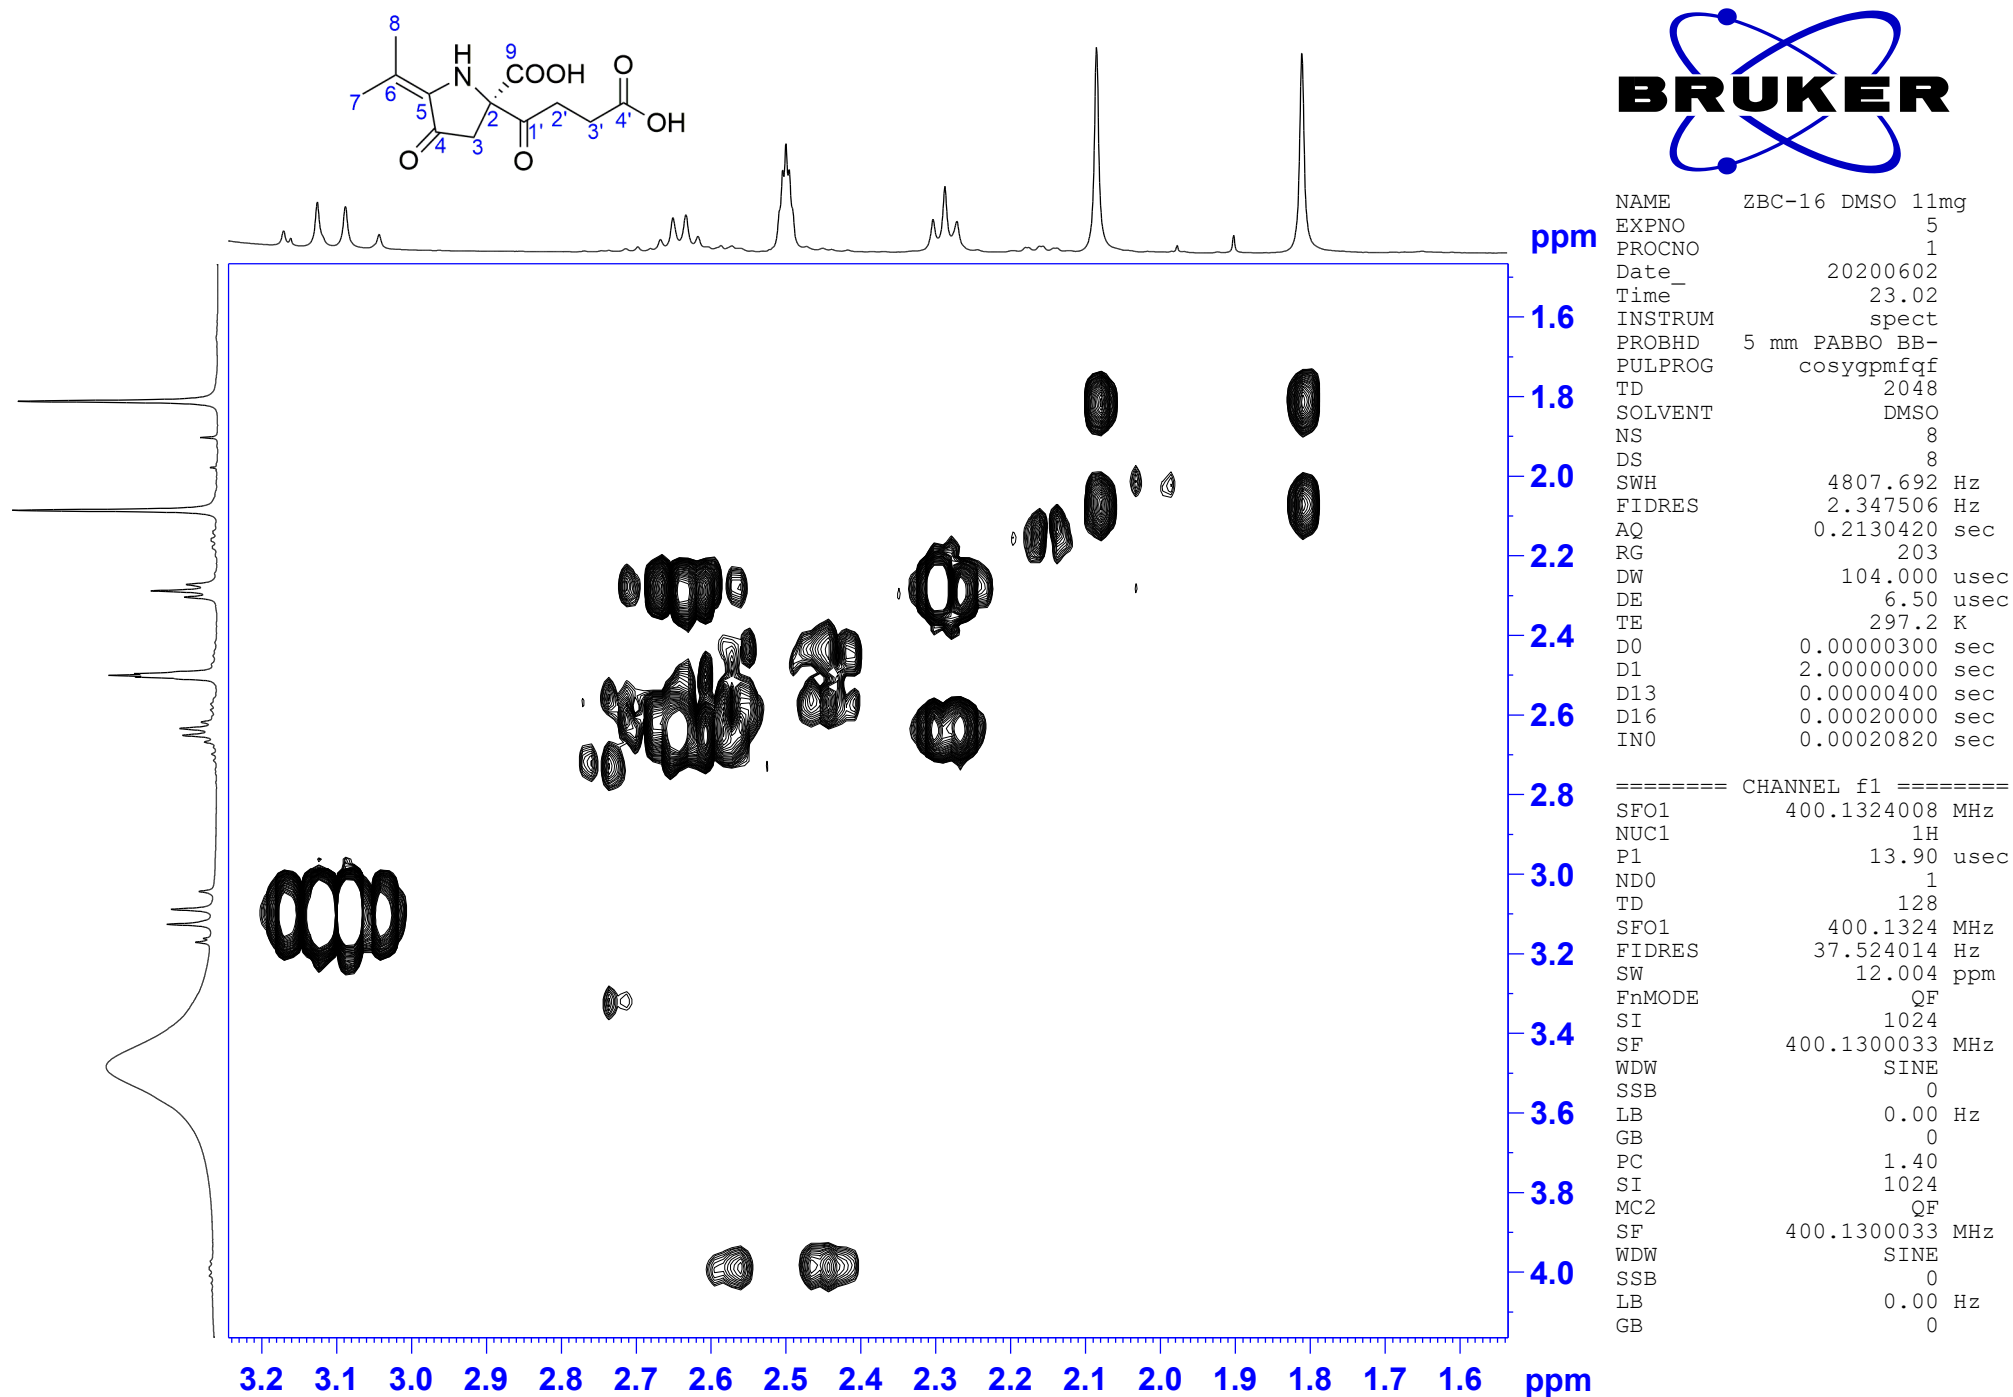



Figure S26. HMBC spectrum of compound 4 in DMSO.

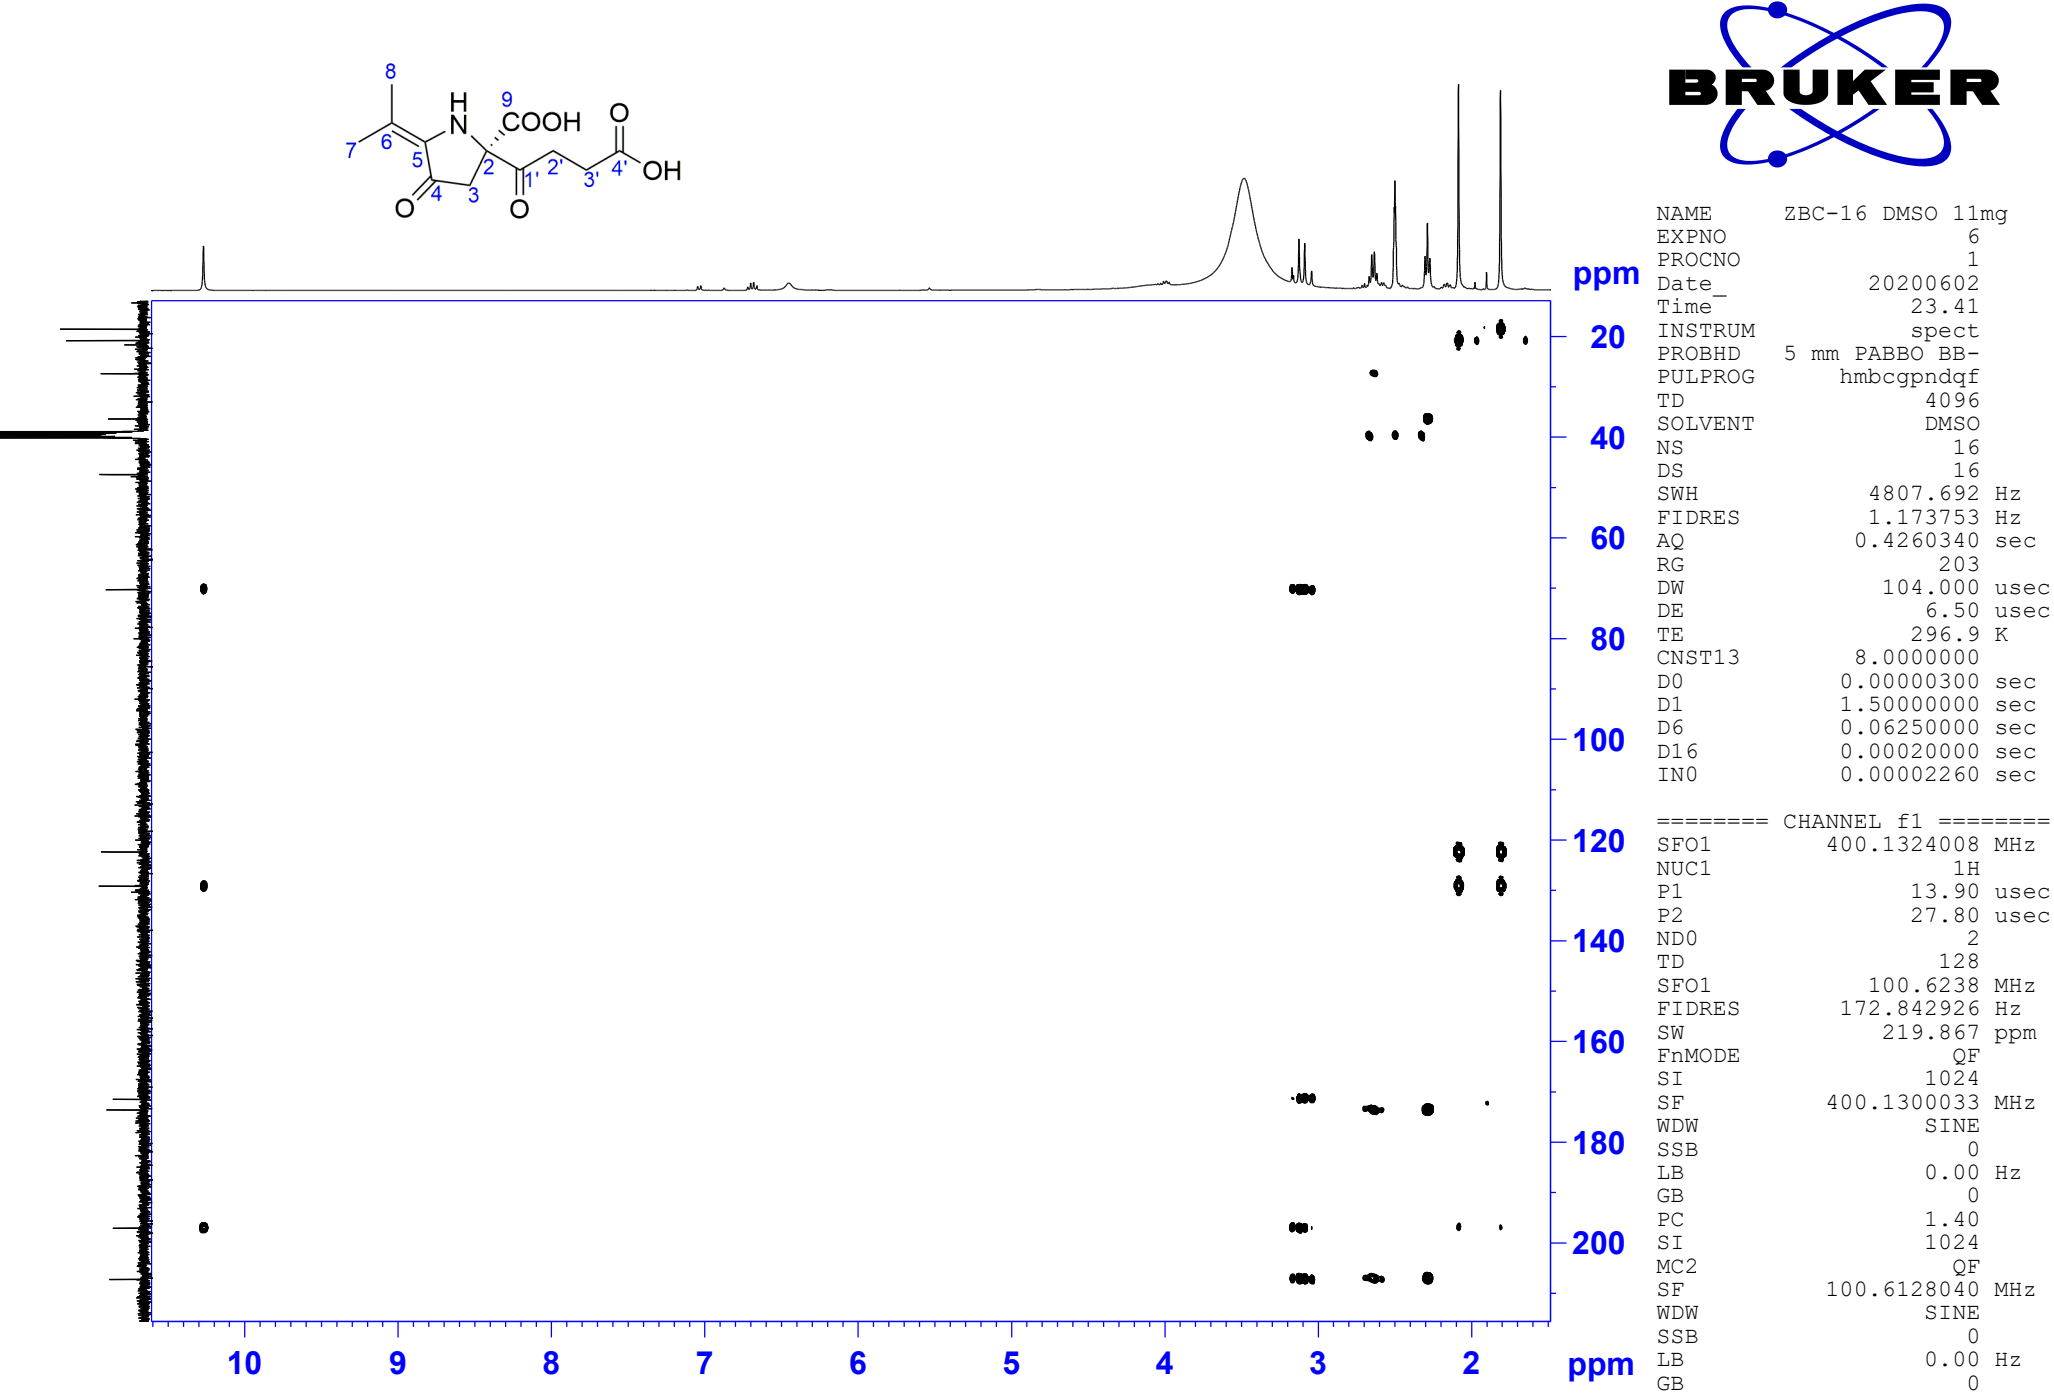

**Figure S27.** NOESY spectrum of compound **4** in DMSO.

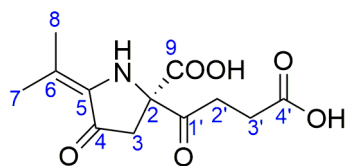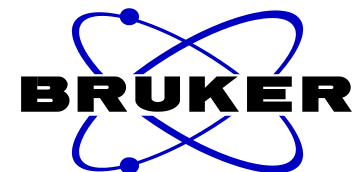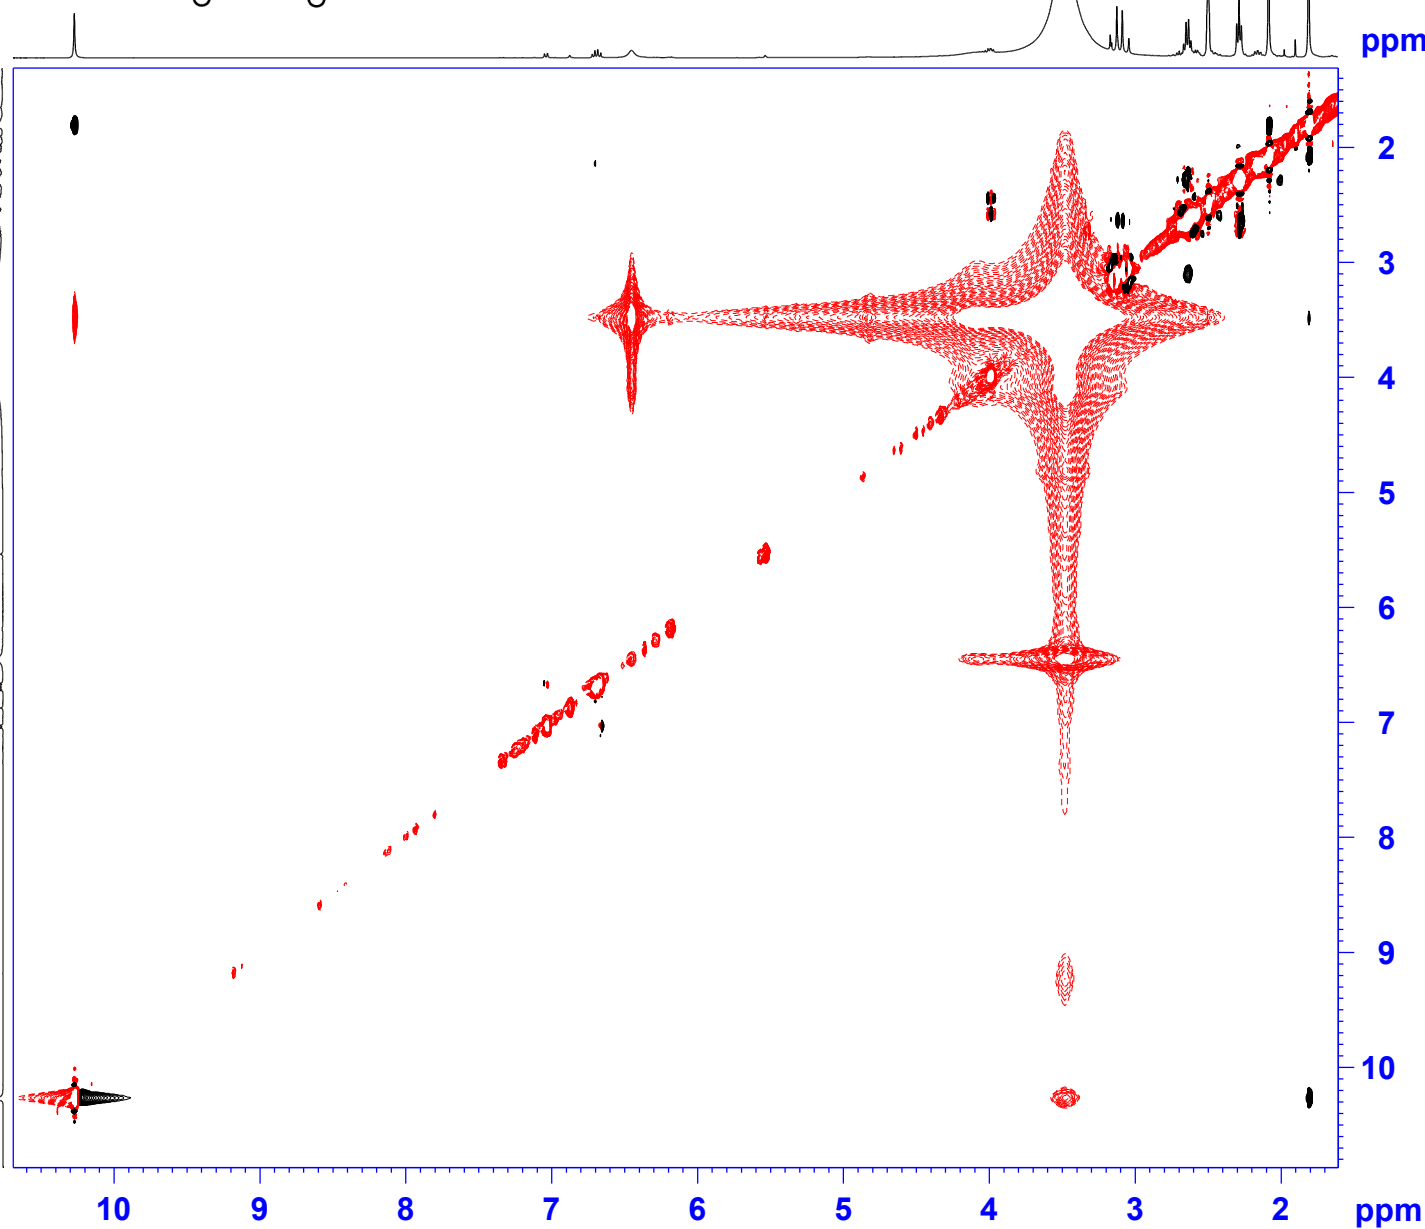

NAME ZBC-16 DMSO 11mg  
 EXPNO 7  
 PROCNO 1  
 Date\_ 20200603  
 Time\_ 0.51  
 INSTRUM spect  
 PROBHD 5 mm PABBO BB-  
 PULPROG noesygpph  
 TD 2048  
 SOLVENT DMSO  
 NS 32  
 DS 32  
 SWH 4795.396 Hz  
 FIDRES 2.341502 Hz  
 AQ 0.2135881 sec  
 RG 114  
 DW 104.267 usec  
 DE 6.50 usec  
 TE 296.9 K  
 D0 0.00008640 sec  
 D1 2.00000000 sec  
 D8 0.30000001 sec  
 D11 0.03000000 sec  
 D12 0.00002000 sec  
 D16 0.00020000 sec  
 IN0 0.00020820 sec

===== CHANNEL f1 =====  
 SFO1 400.1324008 MHz  
 NUC1 1H  
 P1 13.90 usec  
 P2 27.80 usec  
 P17 2500.00 usec  
 ND0 1  
 TD 256  
 SFO1 400.1324 MHz  
 FIDRES 18.762007 Hz  
 SW 12.004 ppm  
 FnMODE States-TPPI  
 SI 1024  
 SF 400.1300033 MHz  
 WDW QSINE  
 SSB 2  
 LB 0.00 Hz  
 GB 0  
 PC 1.00  
 SI 1024  
 MC2 States-TPPI  
 SF 400.1300033 MHz  
 WDW QSINE  
 SSB 2  
 LB 0.00 Hz  
 GB 0

Figure S28. HRESIMS spectrum of compound 4.

Elemental Composition Report

Single Mass Analysis

Tolerance = 40.0 mDa / DBE: min = -1.5, max = 50.0

Element prediction: Off

Number of isotope peaks used for i-FIT = 3

Monoisotopic Mass, Even Electron Ions

87 formula(e) evaluated with 10 results within limits (up to 50 best isotopic matches for each mass)

Elements Used:

C: 10-14 H: 0-40 N: 0-5 O: 0-7 Na: 1-1

ZBC-16 98 (0.390) Cm (51:262)

1: TOF MS ES+

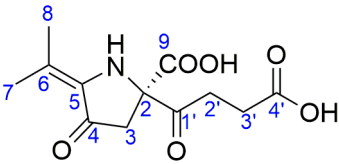

Chemical Formula: C<sub>12</sub>H<sub>15</sub>NNaO<sub>6</sub><sup>+</sup>  
Exact Mass: 292.0792

2.40e+008

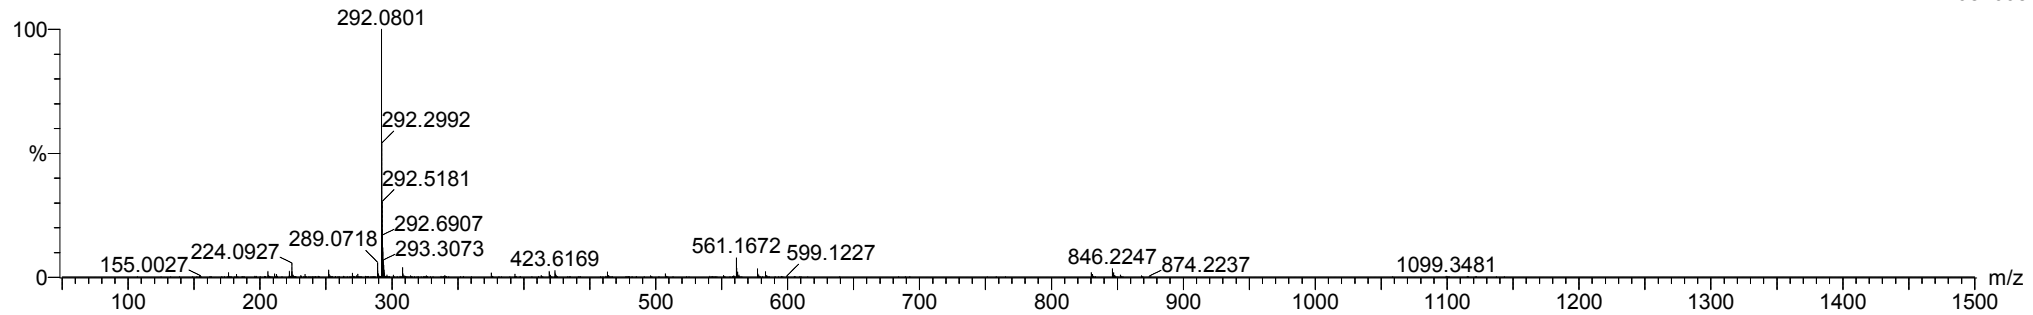

Minimum: -1.5  
Maximum: 40.0 10.0 50.0

| Mass     | Calc. Mass | mDa   | PPM    | DBE  | i-FIT  | Norm  | Conf (%) | Formula          |
|----------|------------|-------|--------|------|--------|-------|----------|------------------|
| 292.0801 | 292.0546   | 25.5  | 87.3   | 6.5  | 2895.5 | 0.777 | 46.00    | C10 H11 N3 O6 Na |
|          | 292.1022   | -22.1 | -75.7  | 5.5  | 2896.1 | 1.426 | 24.03    | C10 H15 N5 O4 Na |
|          | 292.0909   | -10.8 | -37.0  | 5.5  | 2896.9 | 2.181 | 11.29    | C11 H15 N3 O5 Na |
|          | 292.0433   | 36.8  | 126.0  | 6.5  | 2897.1 | 2.381 | 9.24     | C11 H11 N O7 Na  |
|          | 292.0797   | 0.4   | 1.4    | 5.5  | 2897.3 | 2.615 | 7.32     | C12 H15 N O6 Na  |
|          | 292.1161   | -36.0 | -123.3 | 4.5  | 2899.3 | 4.613 | 0.99     | C13 H19 N O5 Na  |
|          | 292.0447   | 35.4  | 121.2  | 11.5 | 2899.9 | 5.194 | 0.56     | C12 H7 N5 O3 Na  |
|          | 292.0698   | 10.3  | 35.3   | 10.5 | 2900.5 | 5.860 | 0.29     | C14 H11 N3 O3 Na |
|          | 292.0810   | -0.9  | -3.1   | 10.5 | 2900.8 | 6.076 | 0.23     | C13 H11 N5 O2 Na |
|          | 292.1174   | -37.3 | -127.7 | 9.5  | 2902.1 | 7.462 | 0.06     | C14 H15 N5 O Na  |

**Figure S29.** The proposed fragmentation scheme of compound **1** by ESI-QTrap-MS/MS.

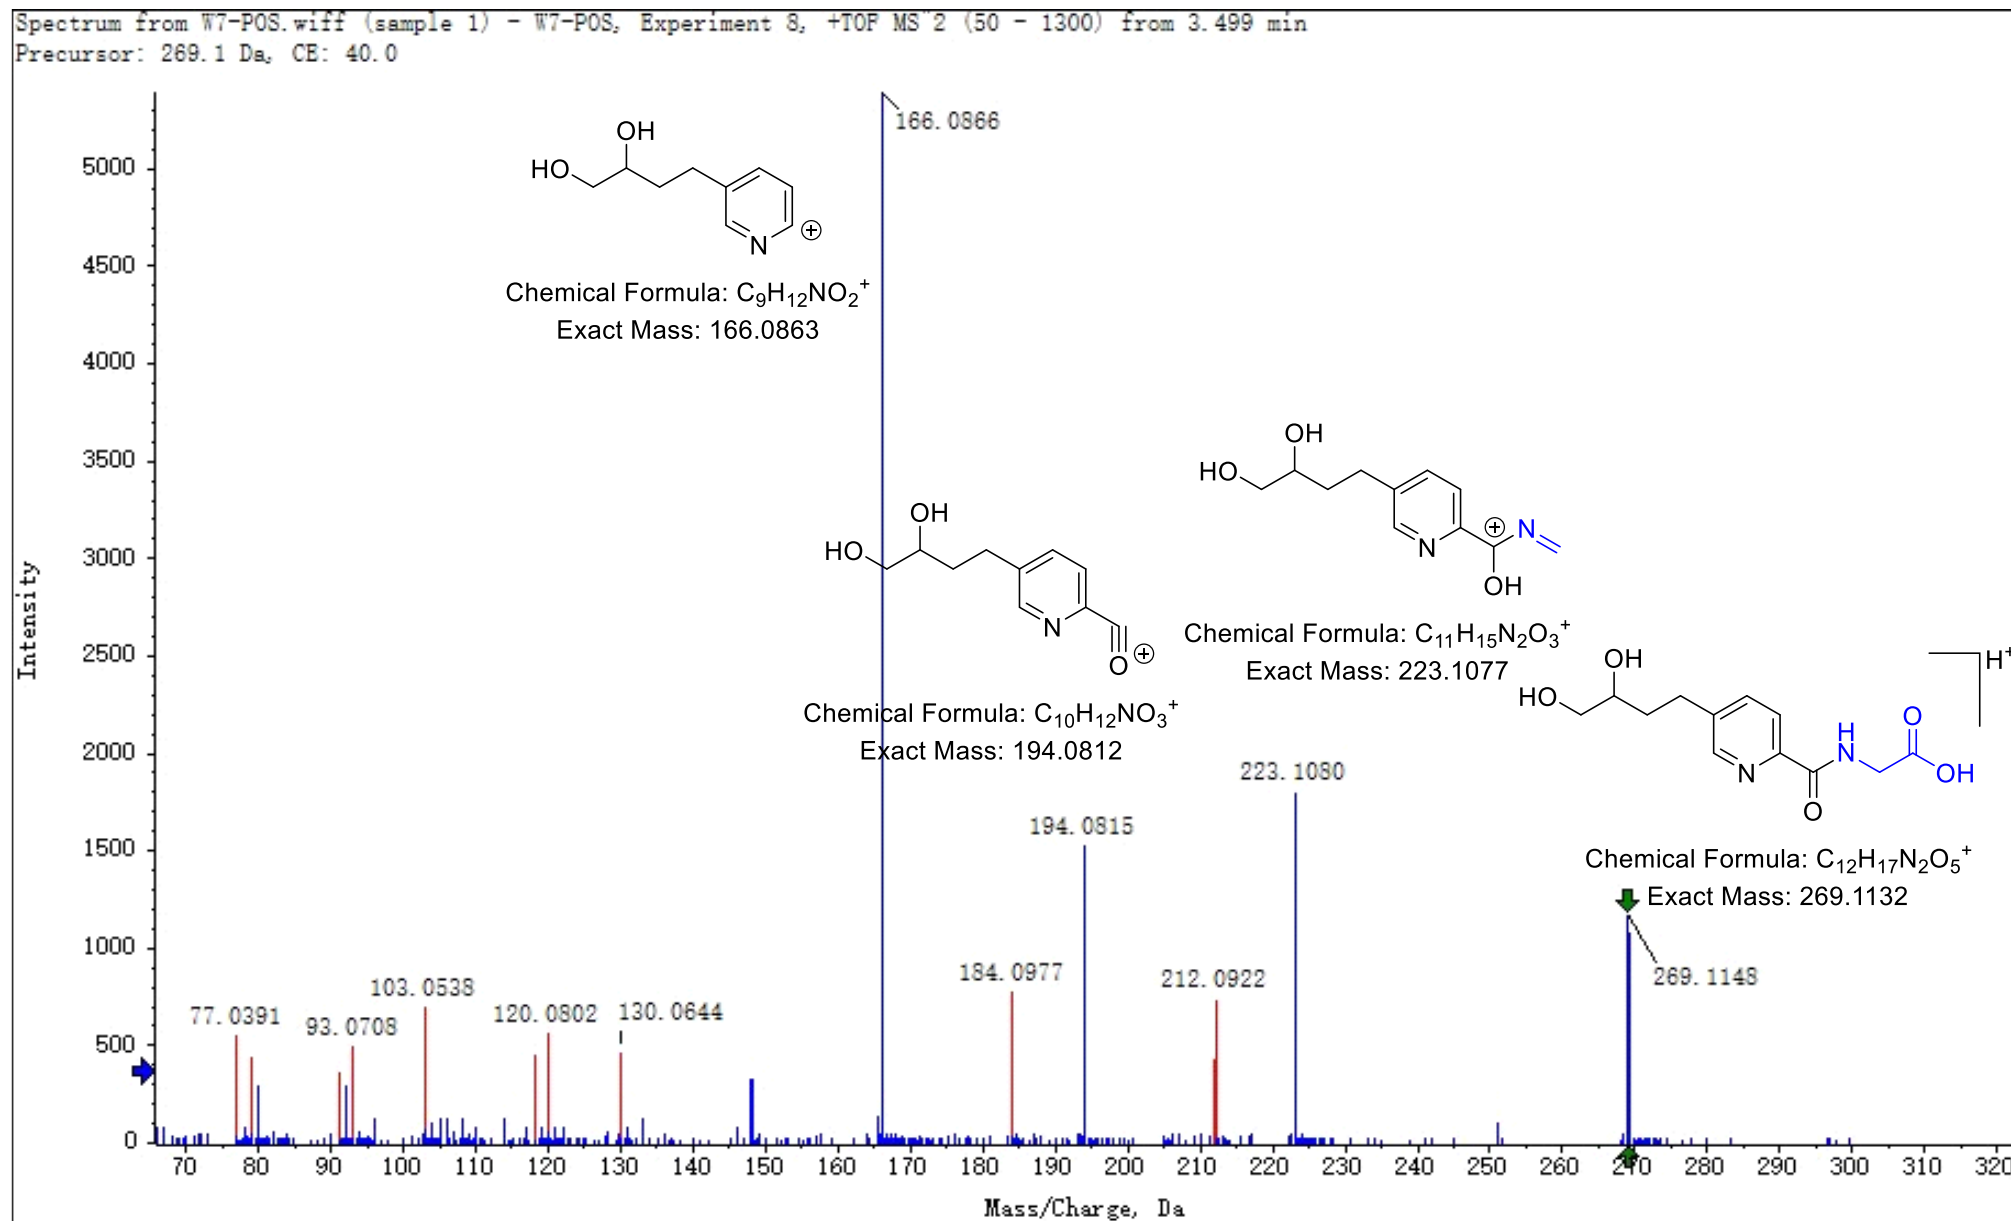

**Figure S30.**  $^1\text{H}$  NMR spectrum of compound **5** in DMSO.

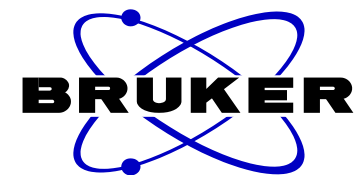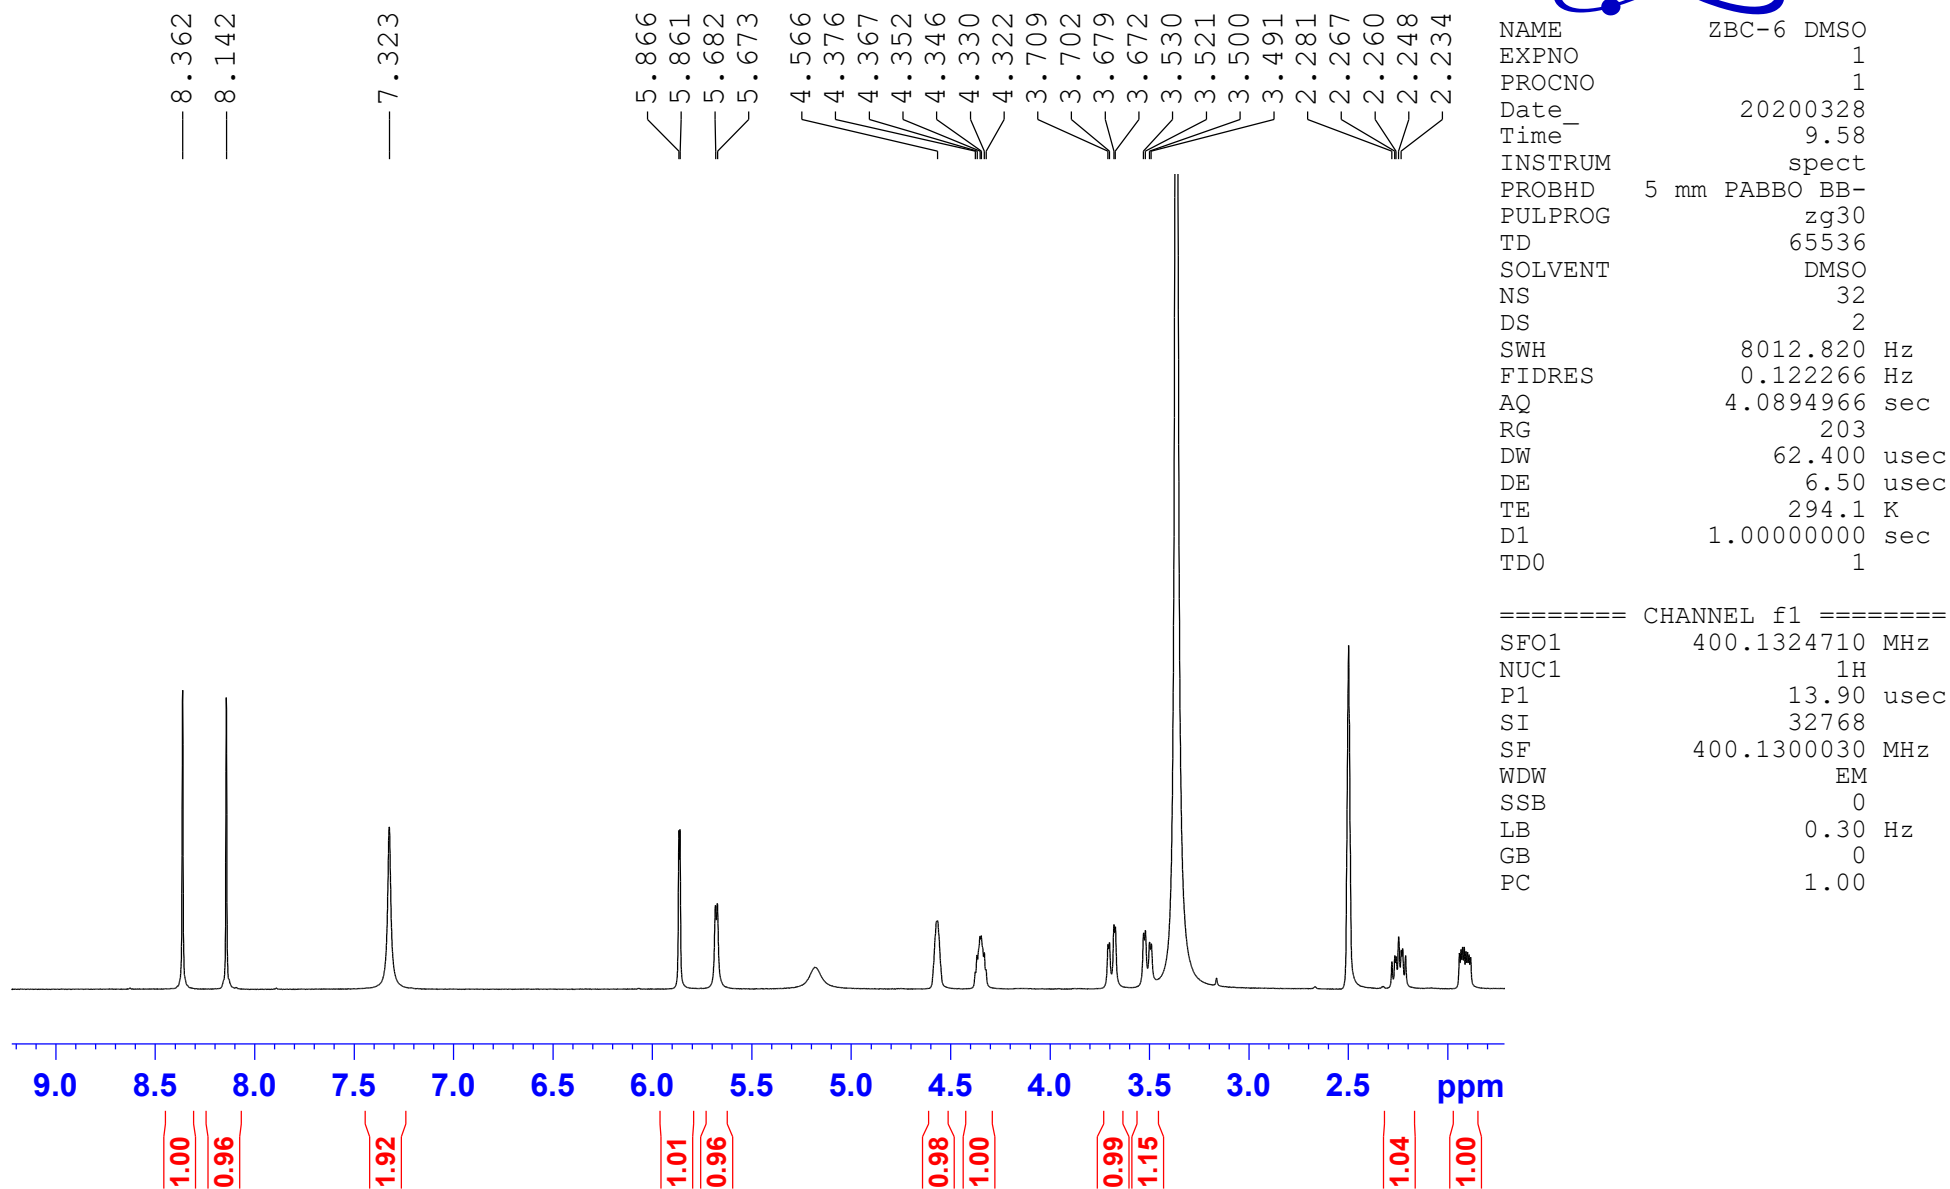

**Figure S31.**  $^1\text{H}$  NMR spectrum of compound **6** in DMSO.

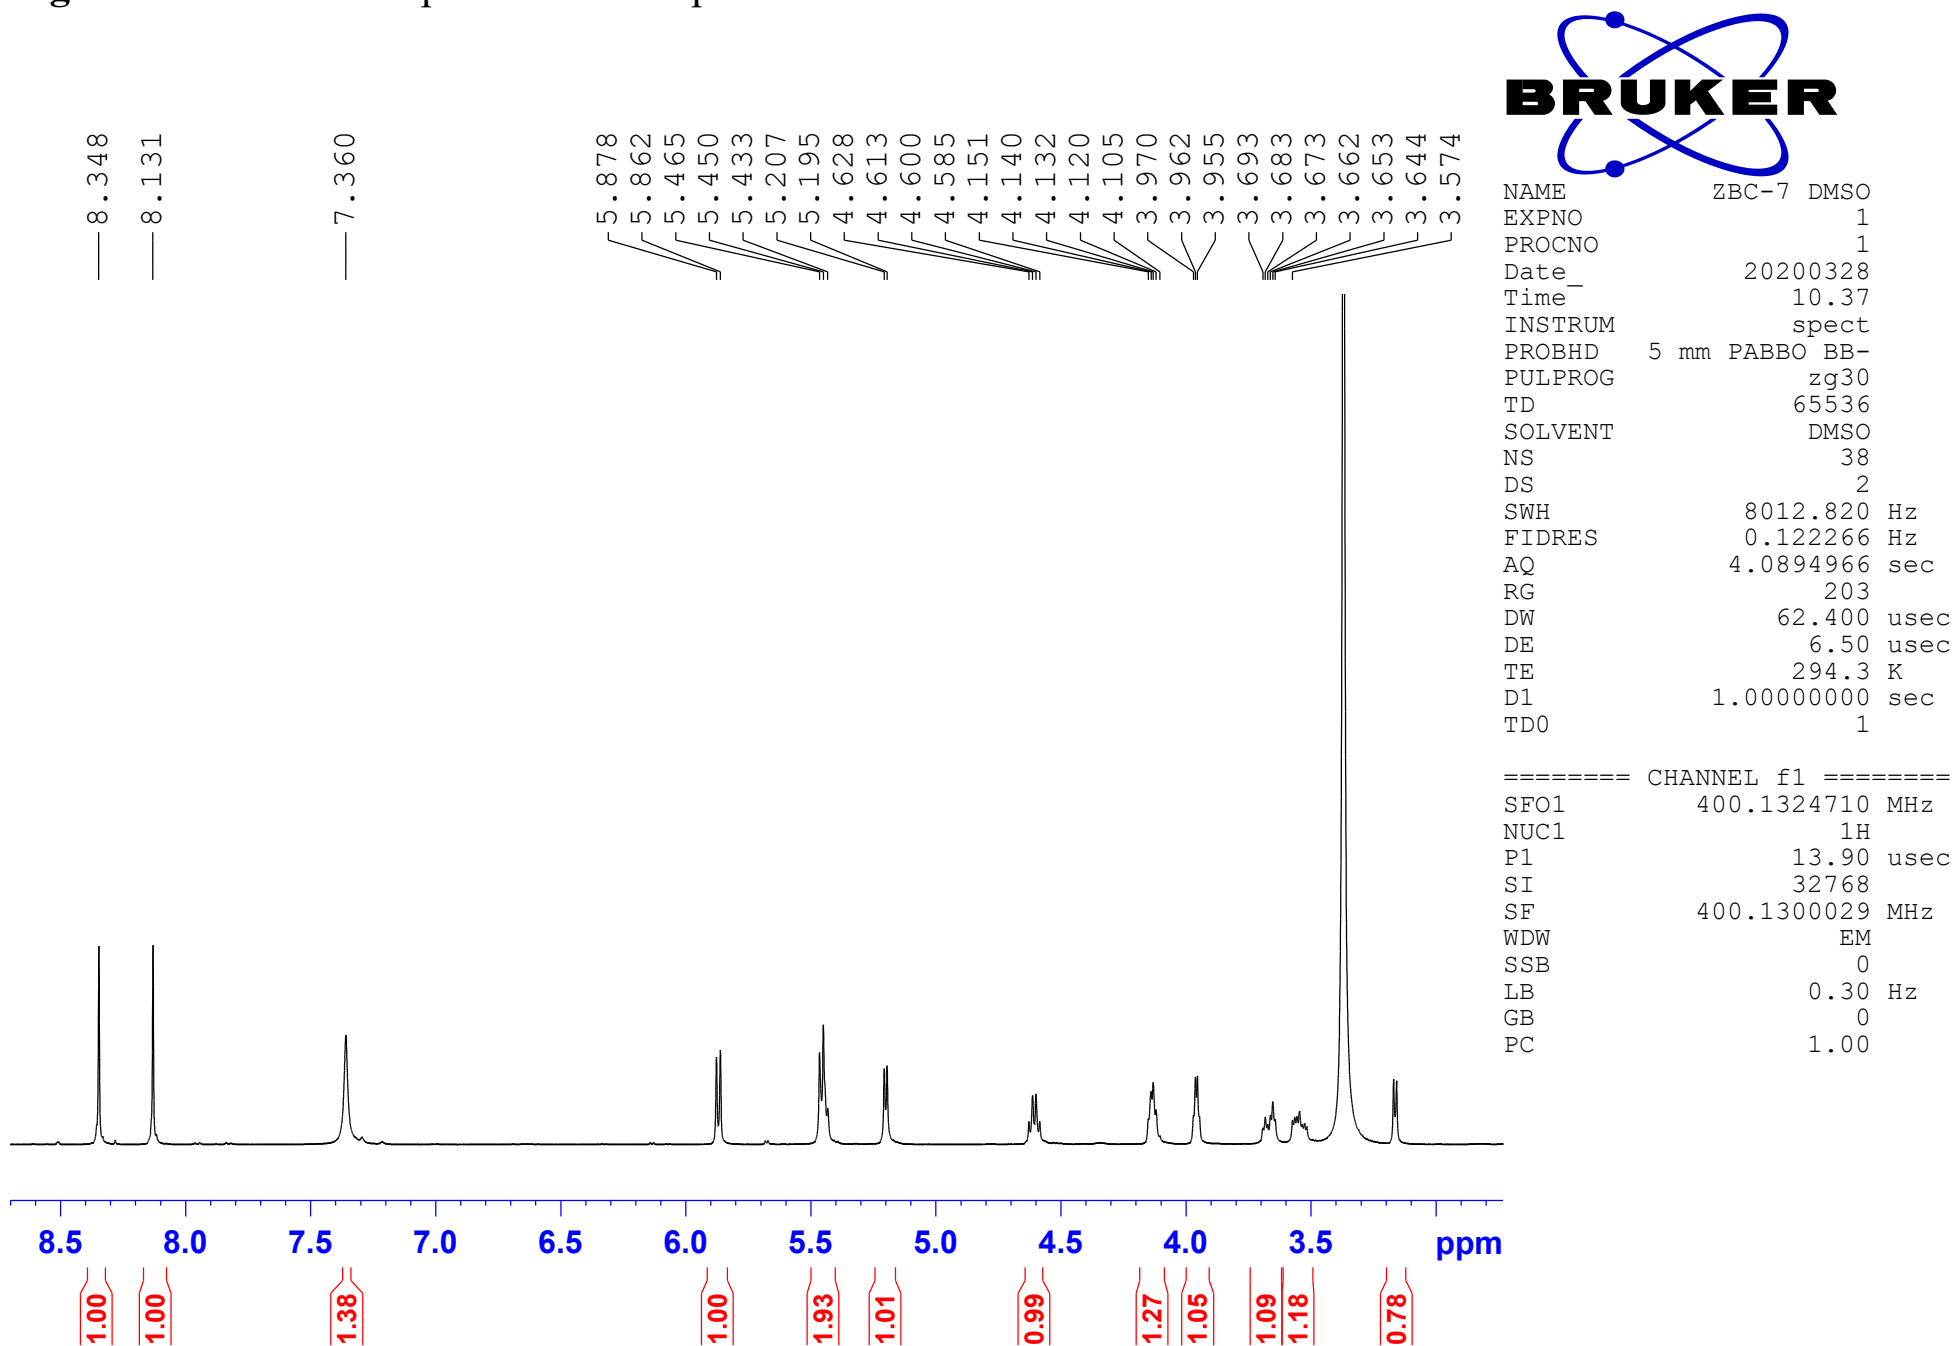

**Figure S32.**  $^1\text{H}$  NMR spectrum of compound **7** in  $\text{CD}_3\text{OD}$ .

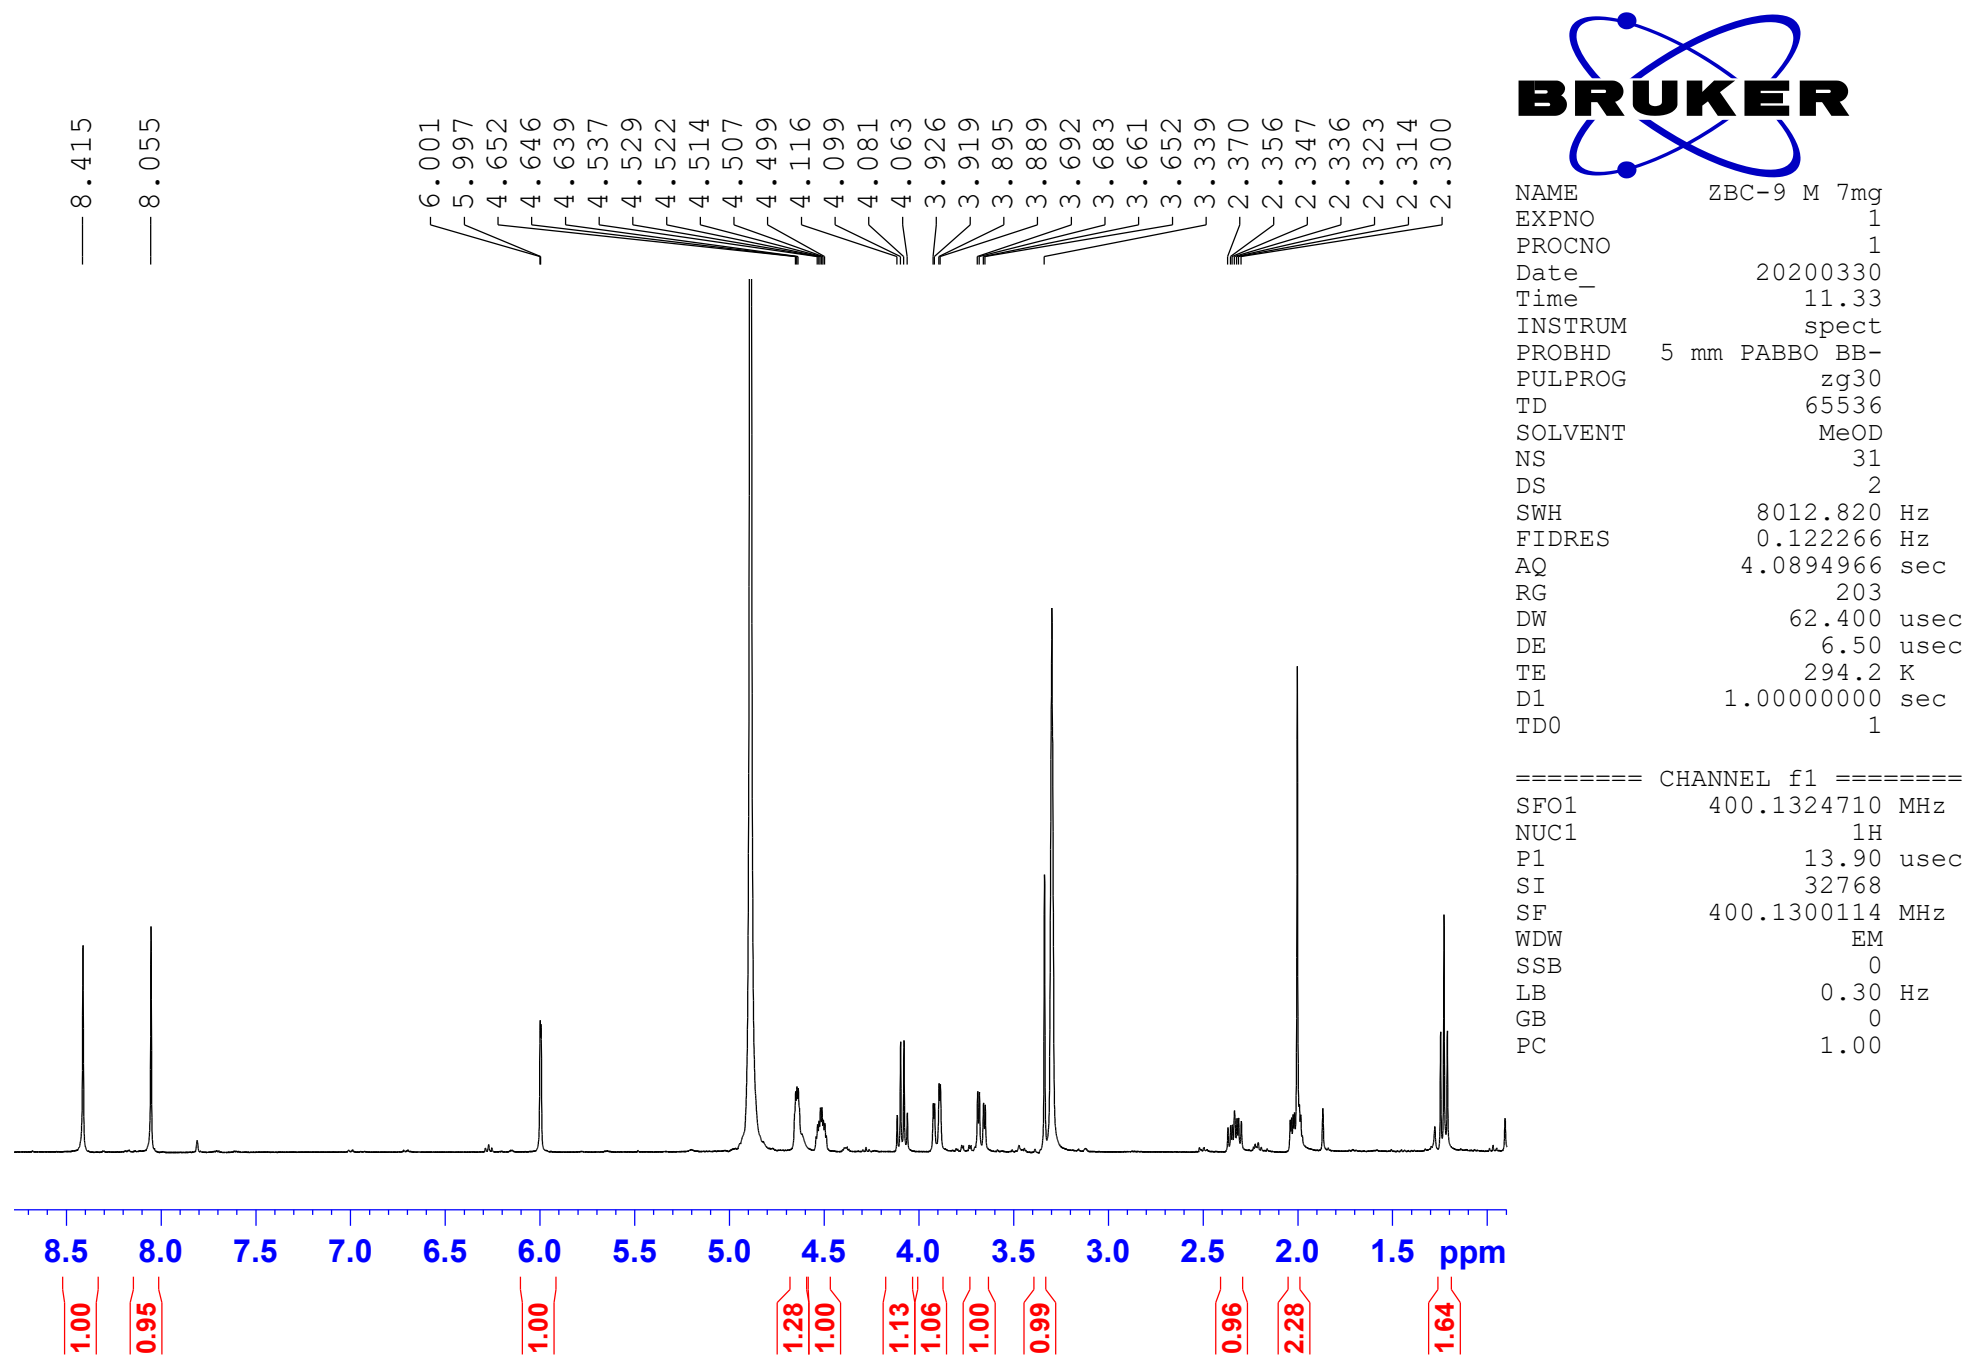

**Figure S33.**  $^1\text{H}$  NMR spectrum of compound **8** in DMSO.

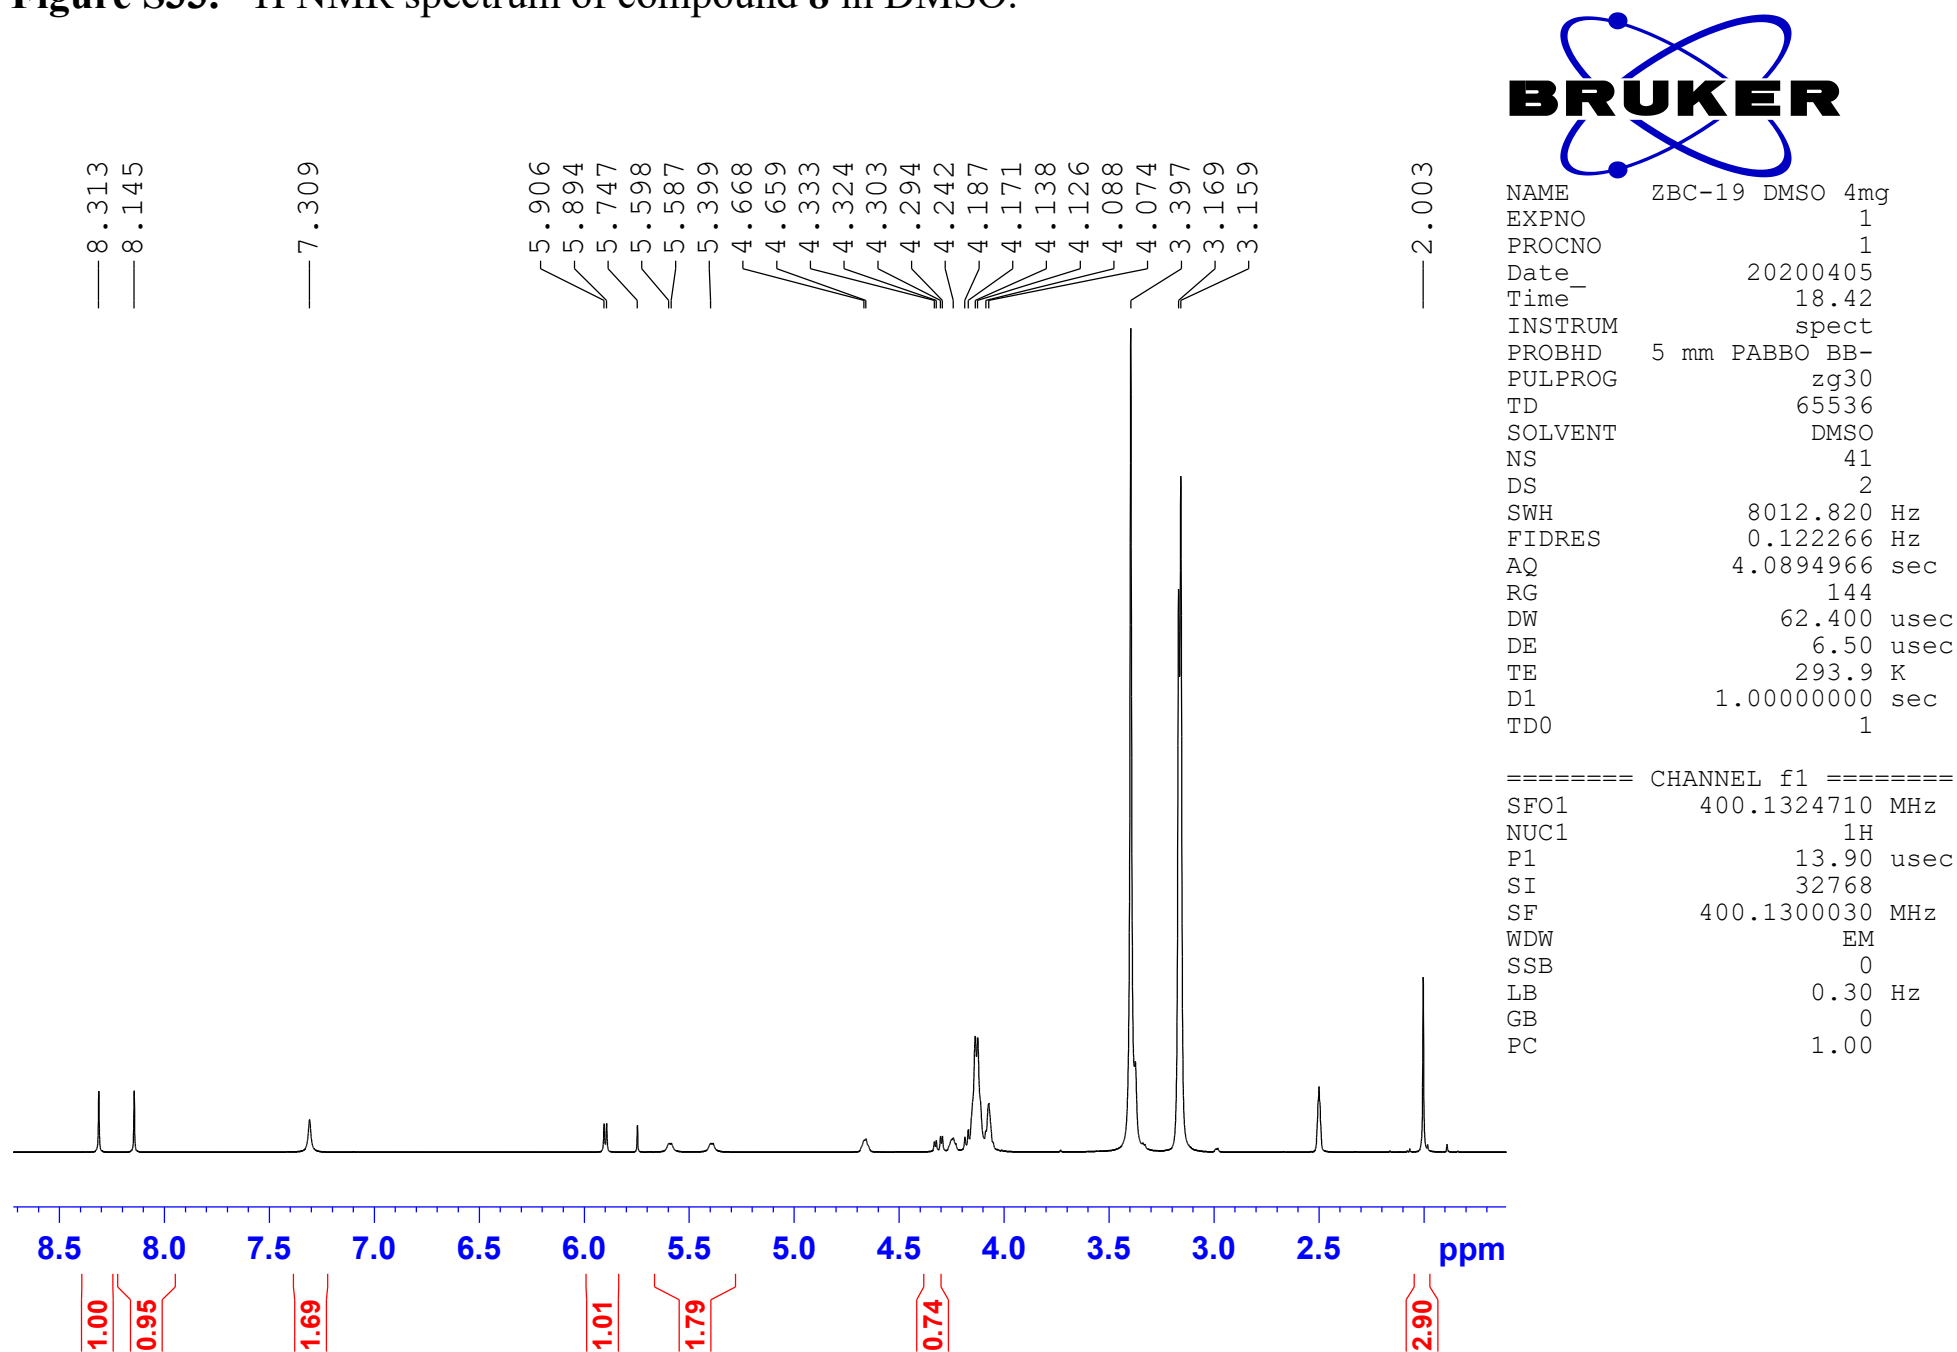



**Figure S34.**  $^1\text{H}$  NMR spectrum of compound **9** in  $\text{CD}_3\text{OD}$ .

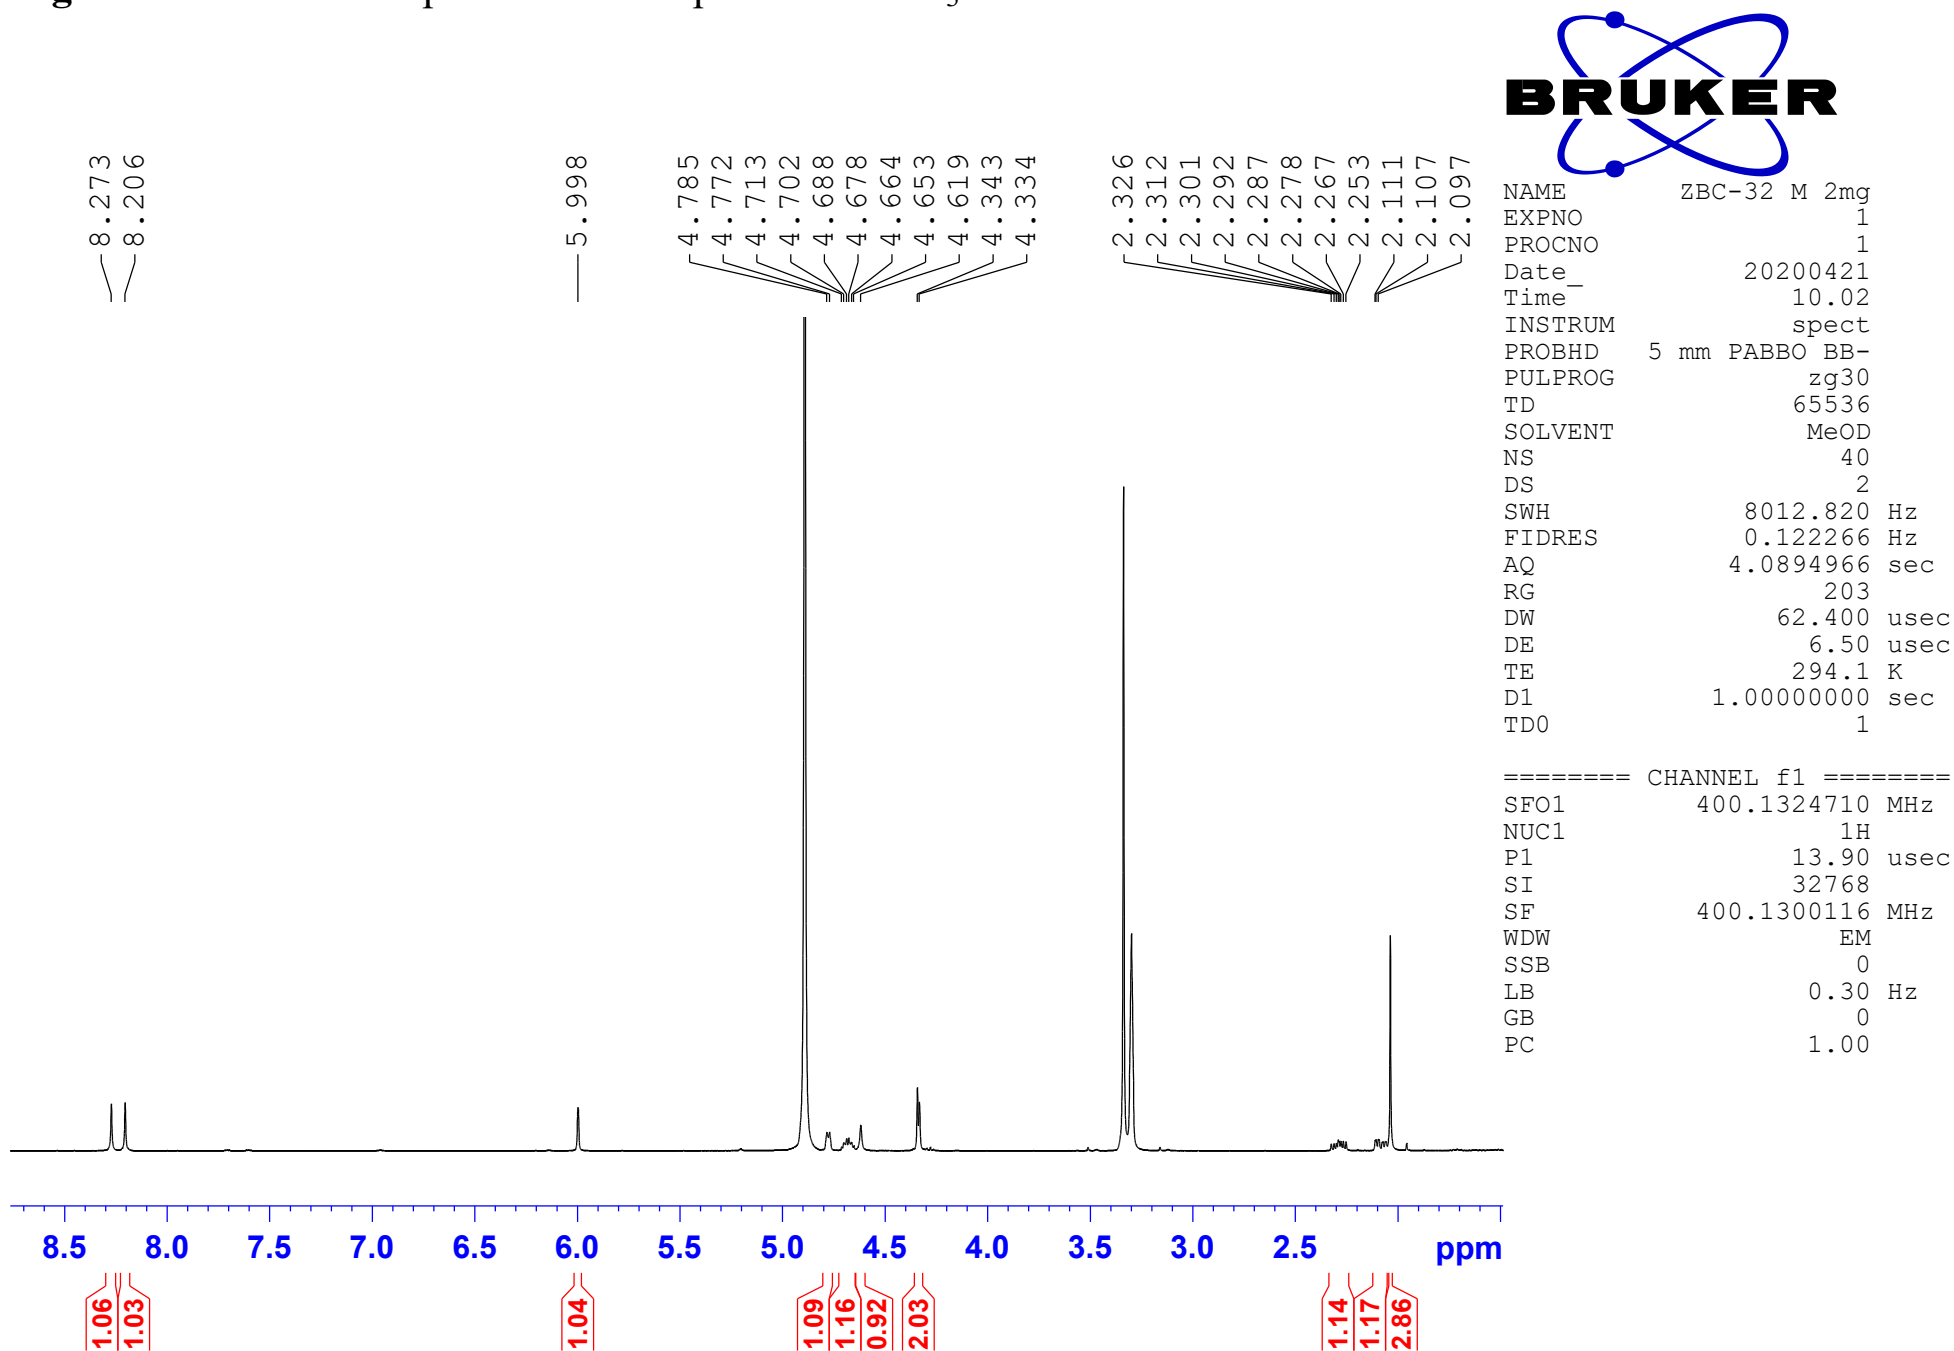

Figure S35.  $^1\text{H}$  NMR spectrum of compound **10** in  $\text{CD}_3\text{OD}$ .

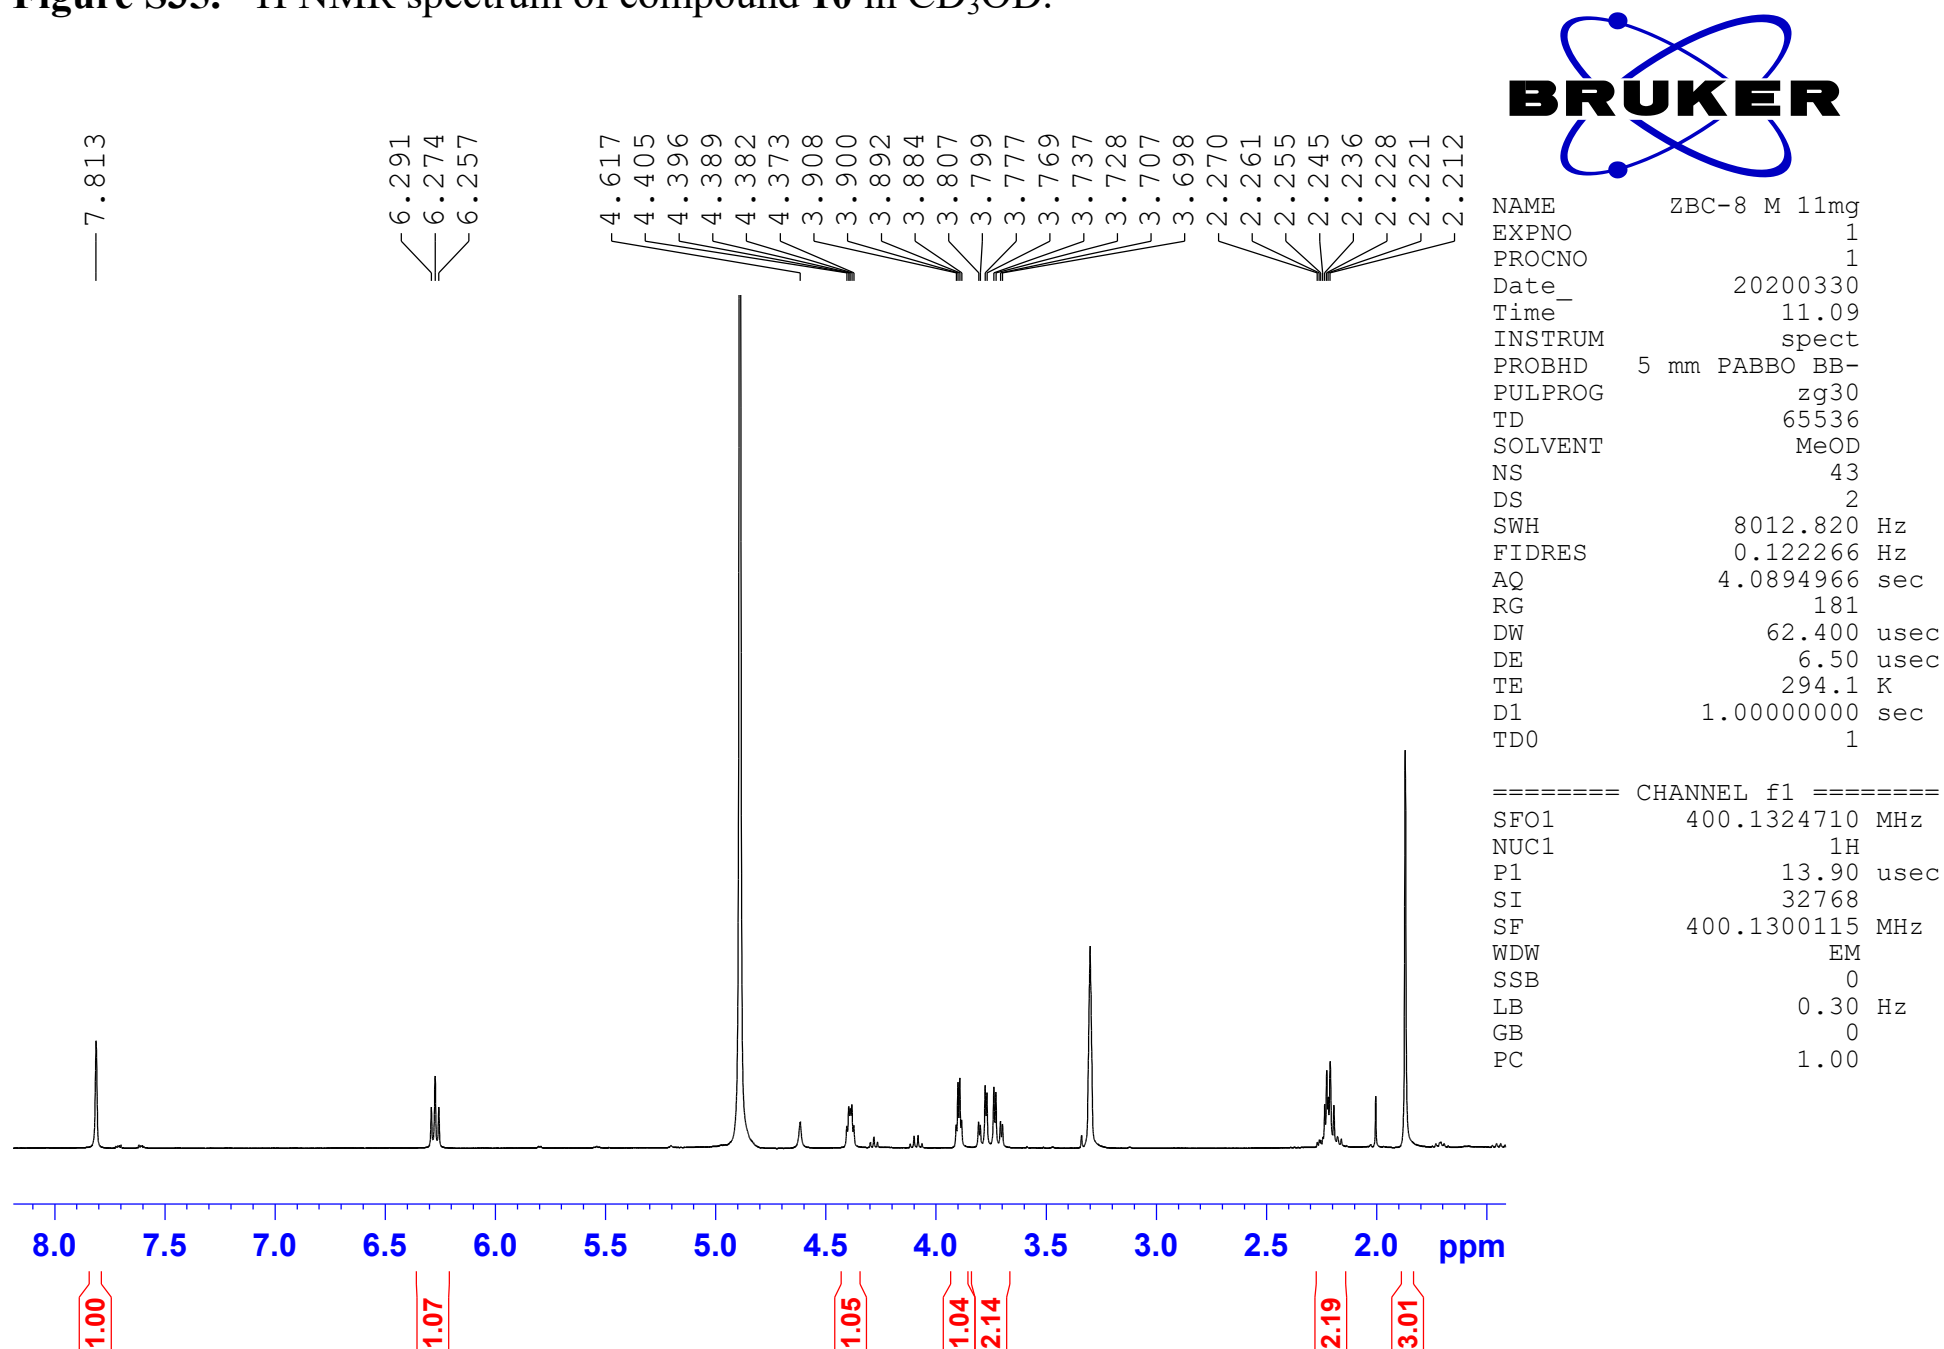

**Figure S36.**  $^1\text{H}$  NMR spectrum of compound **11** in  $\text{CD}_3\text{OD}$ .

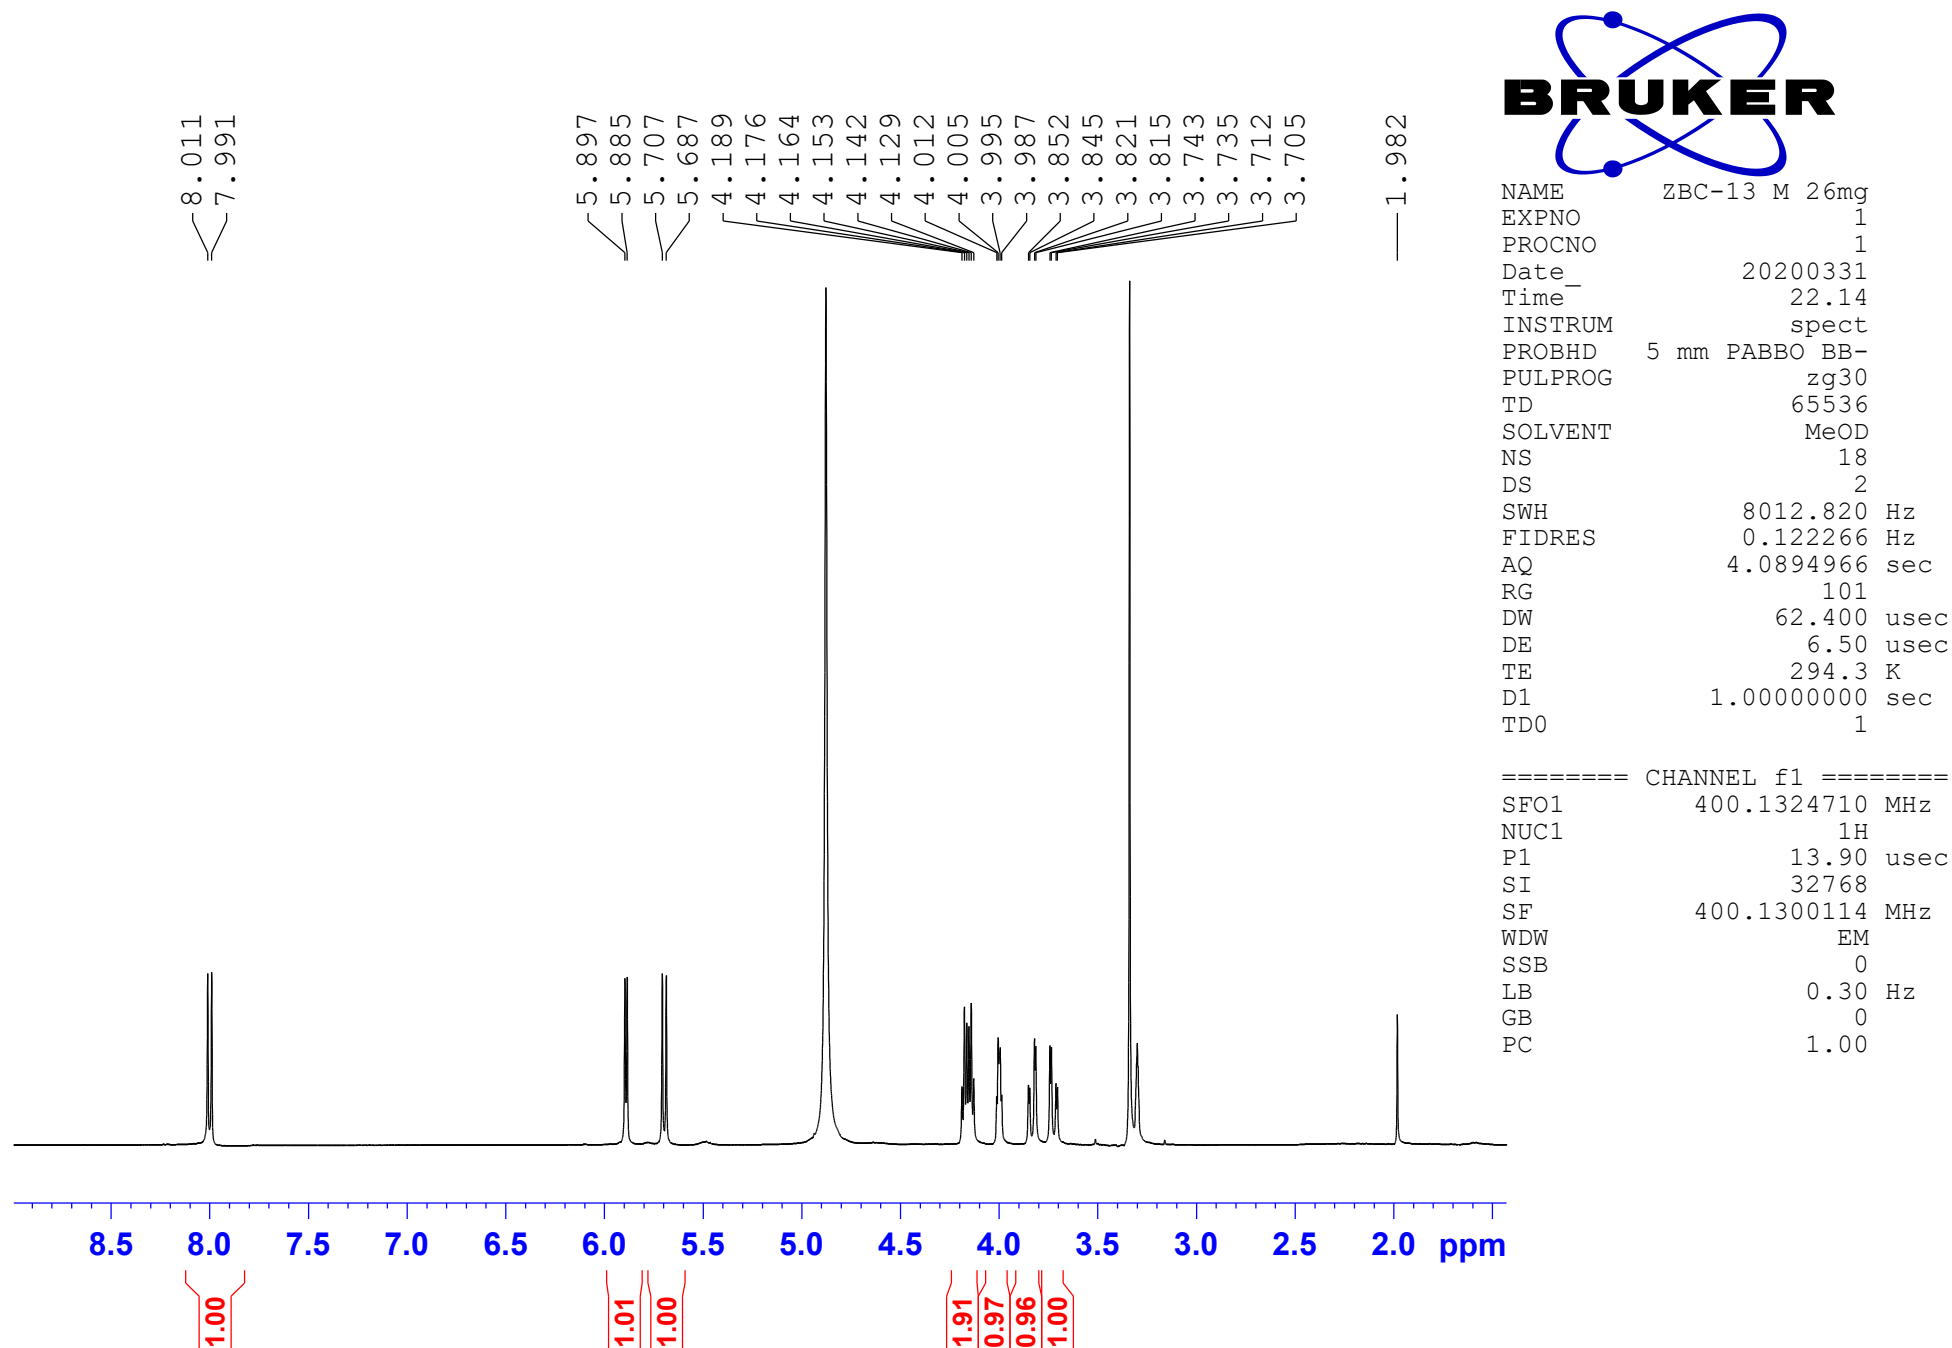

**Figure S37.**  $^1\text{H}$  NMR spectrum of compound **12** in  $\text{CD}_3\text{OD}$ .

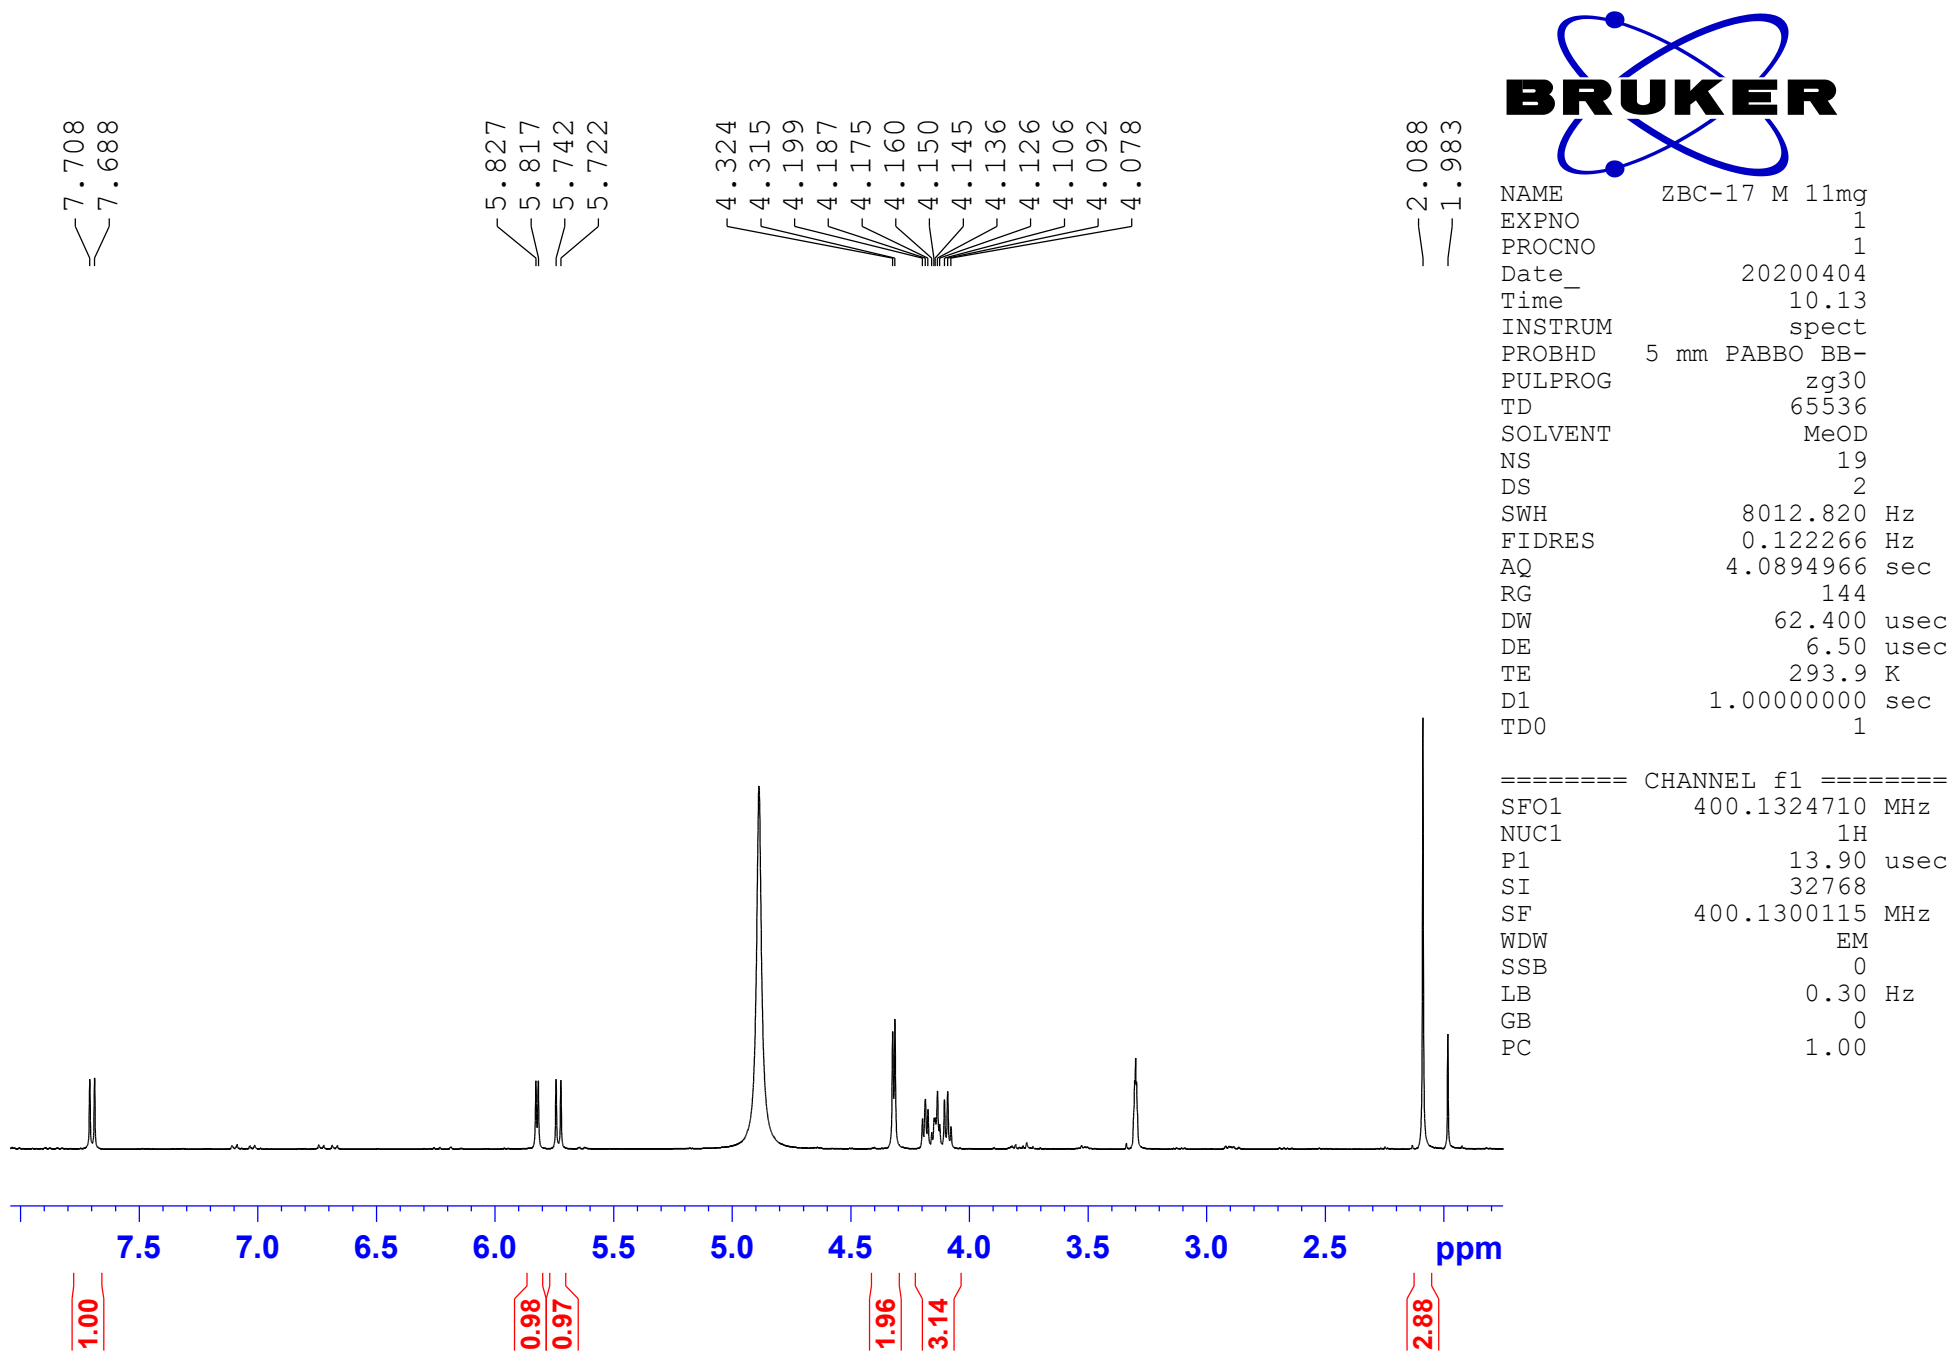

**Figure S38.**  $^1\text{H}$  NMR spectrum of compound **13** in  $\text{CDCl}_3$ .

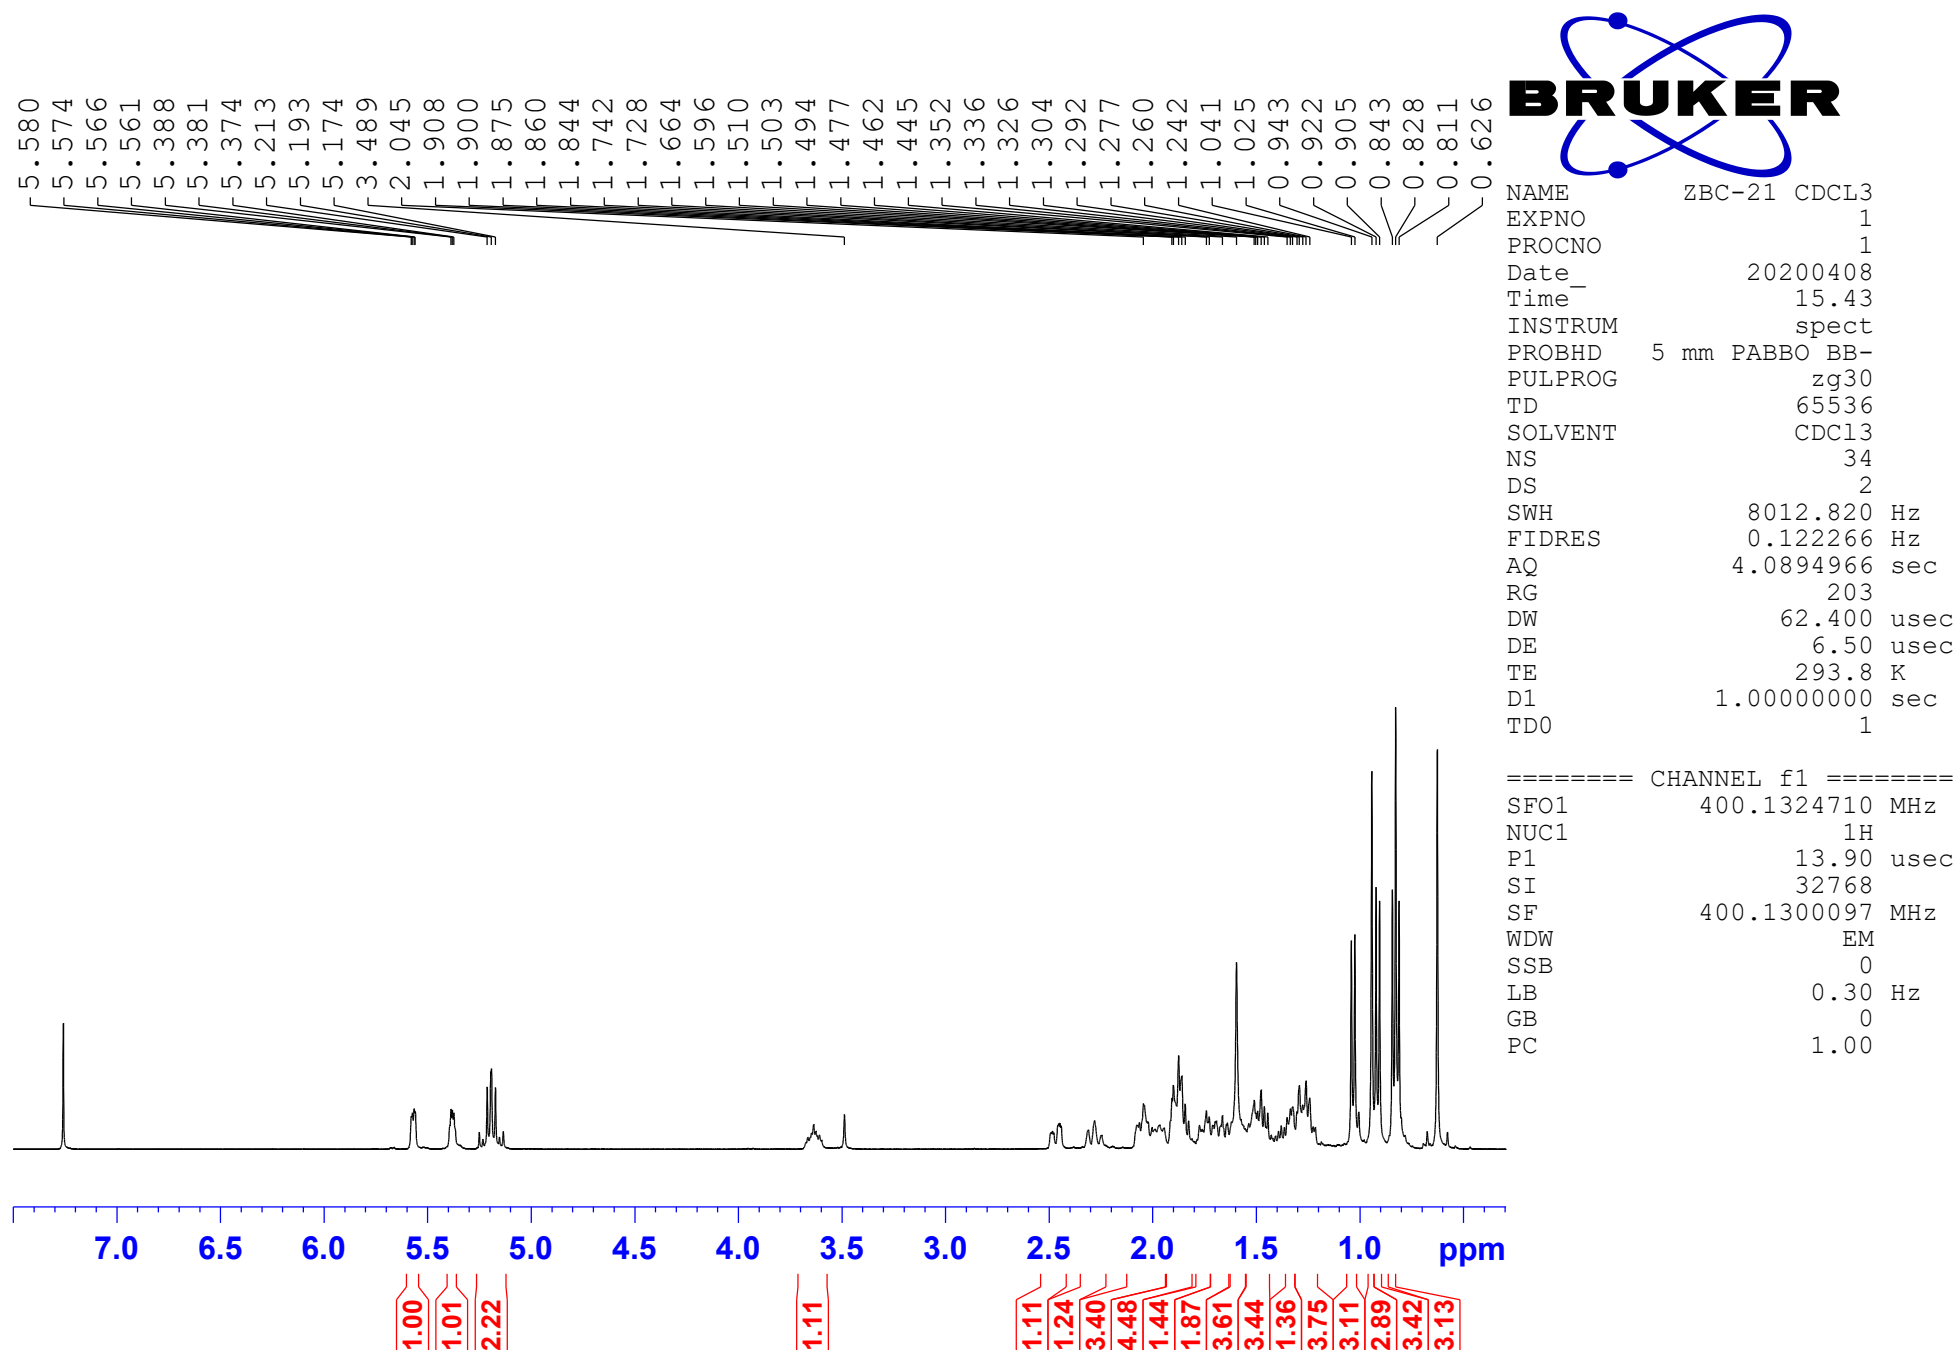

**Figure S39.**  $^1\text{H}$  NMR spectrum of compound **14** in  $\text{CD}_3\text{OD}$ .

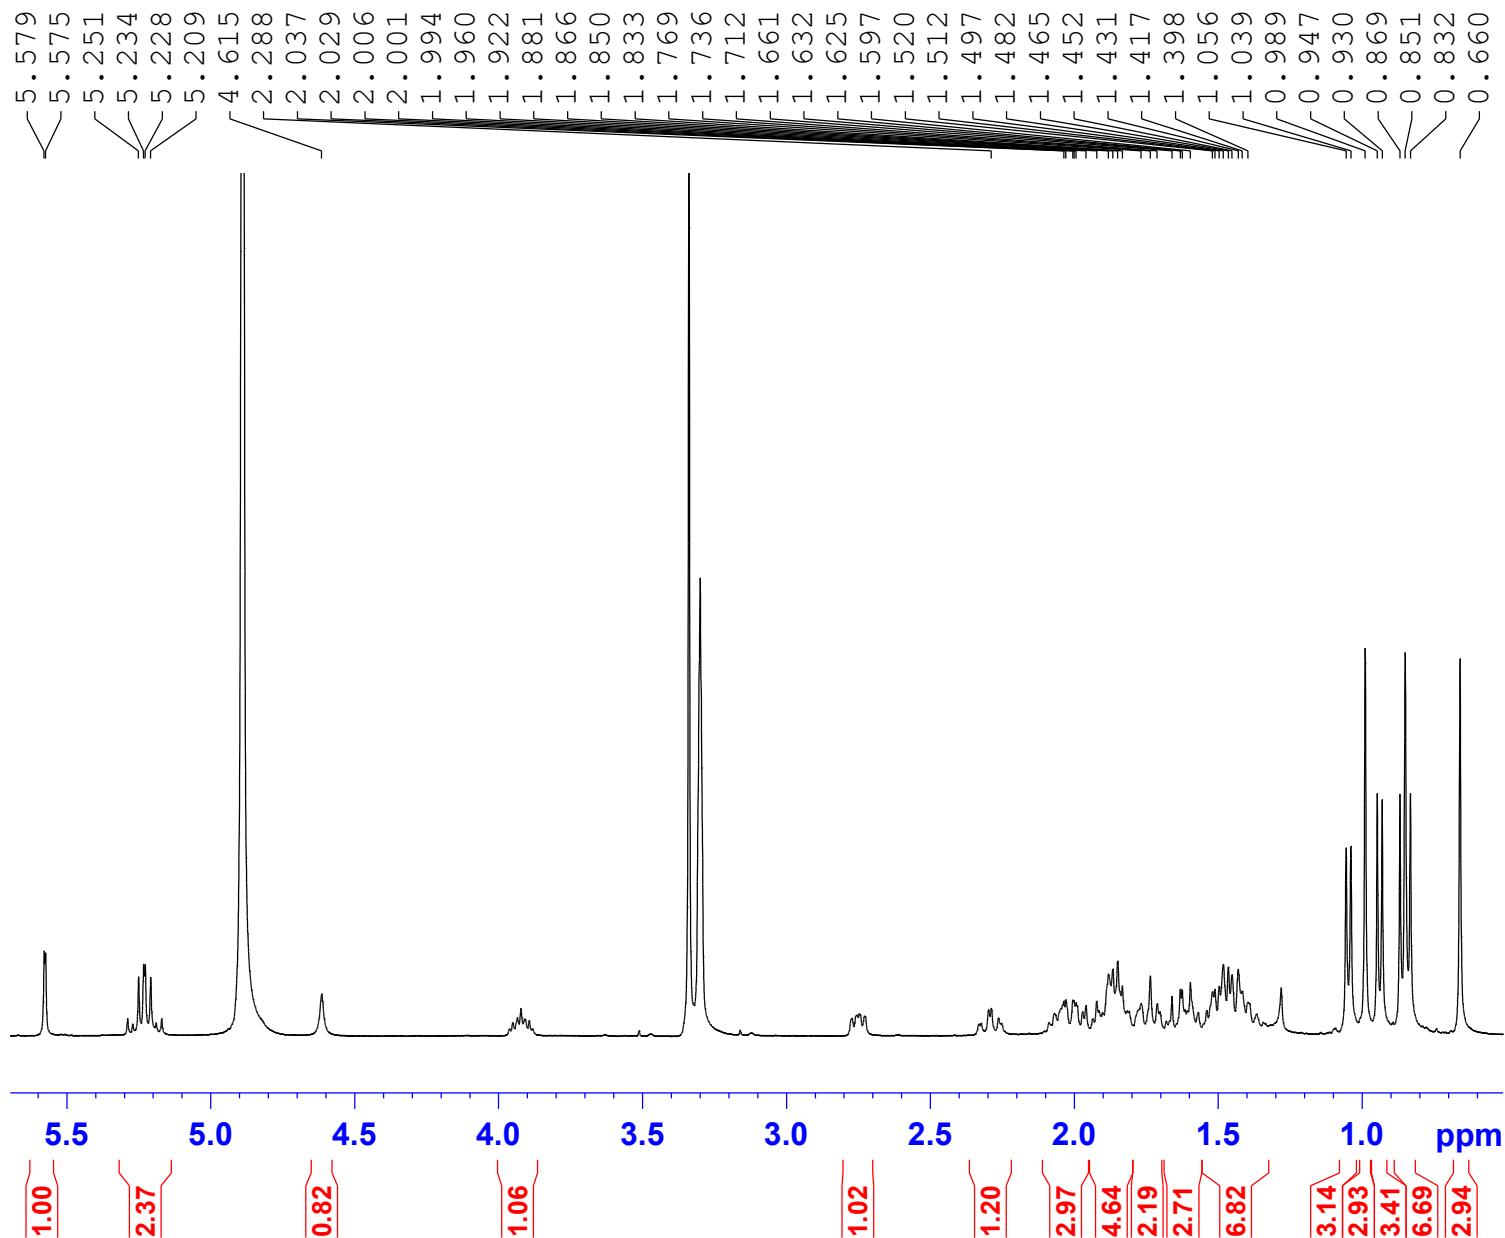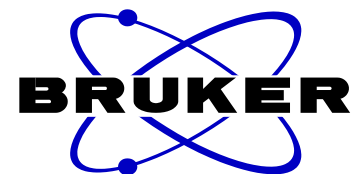

```

NAME          ZBC-47 M 7mg
EXPNO          1
PROCNO         1
Date_          20200502
Time_          20.18
INSTRUM        spect
PROBHD         5 mm PABBO BB-
PULPROG        zg30
TD             65536
SOLVENT        MeOD
NS             30
DS             2
SWH            8012.820 Hz
FIDRES         0.122266 Hz
AQ            4.0894966 sec
RG             181
DW            62.400 usec
DE             6.50 usec
TE            294.3 K
D1            1.00000000 sec
TD0            1
    
```

```

===== CHANNEL f1 =====
SFO1          400.1324710 MHz
NUC1           1H
P1            13.90 usec
SI            32768
SF            400.1300113 MHz
WDW            EM
SSB            0
LB            0.30 Hz
GB            0
PC            1.00
    
```

**Figure S40.**  $^1\text{H}$  NMR spectrum of compound **15** in  $\text{CD}_3\text{OD}$ .

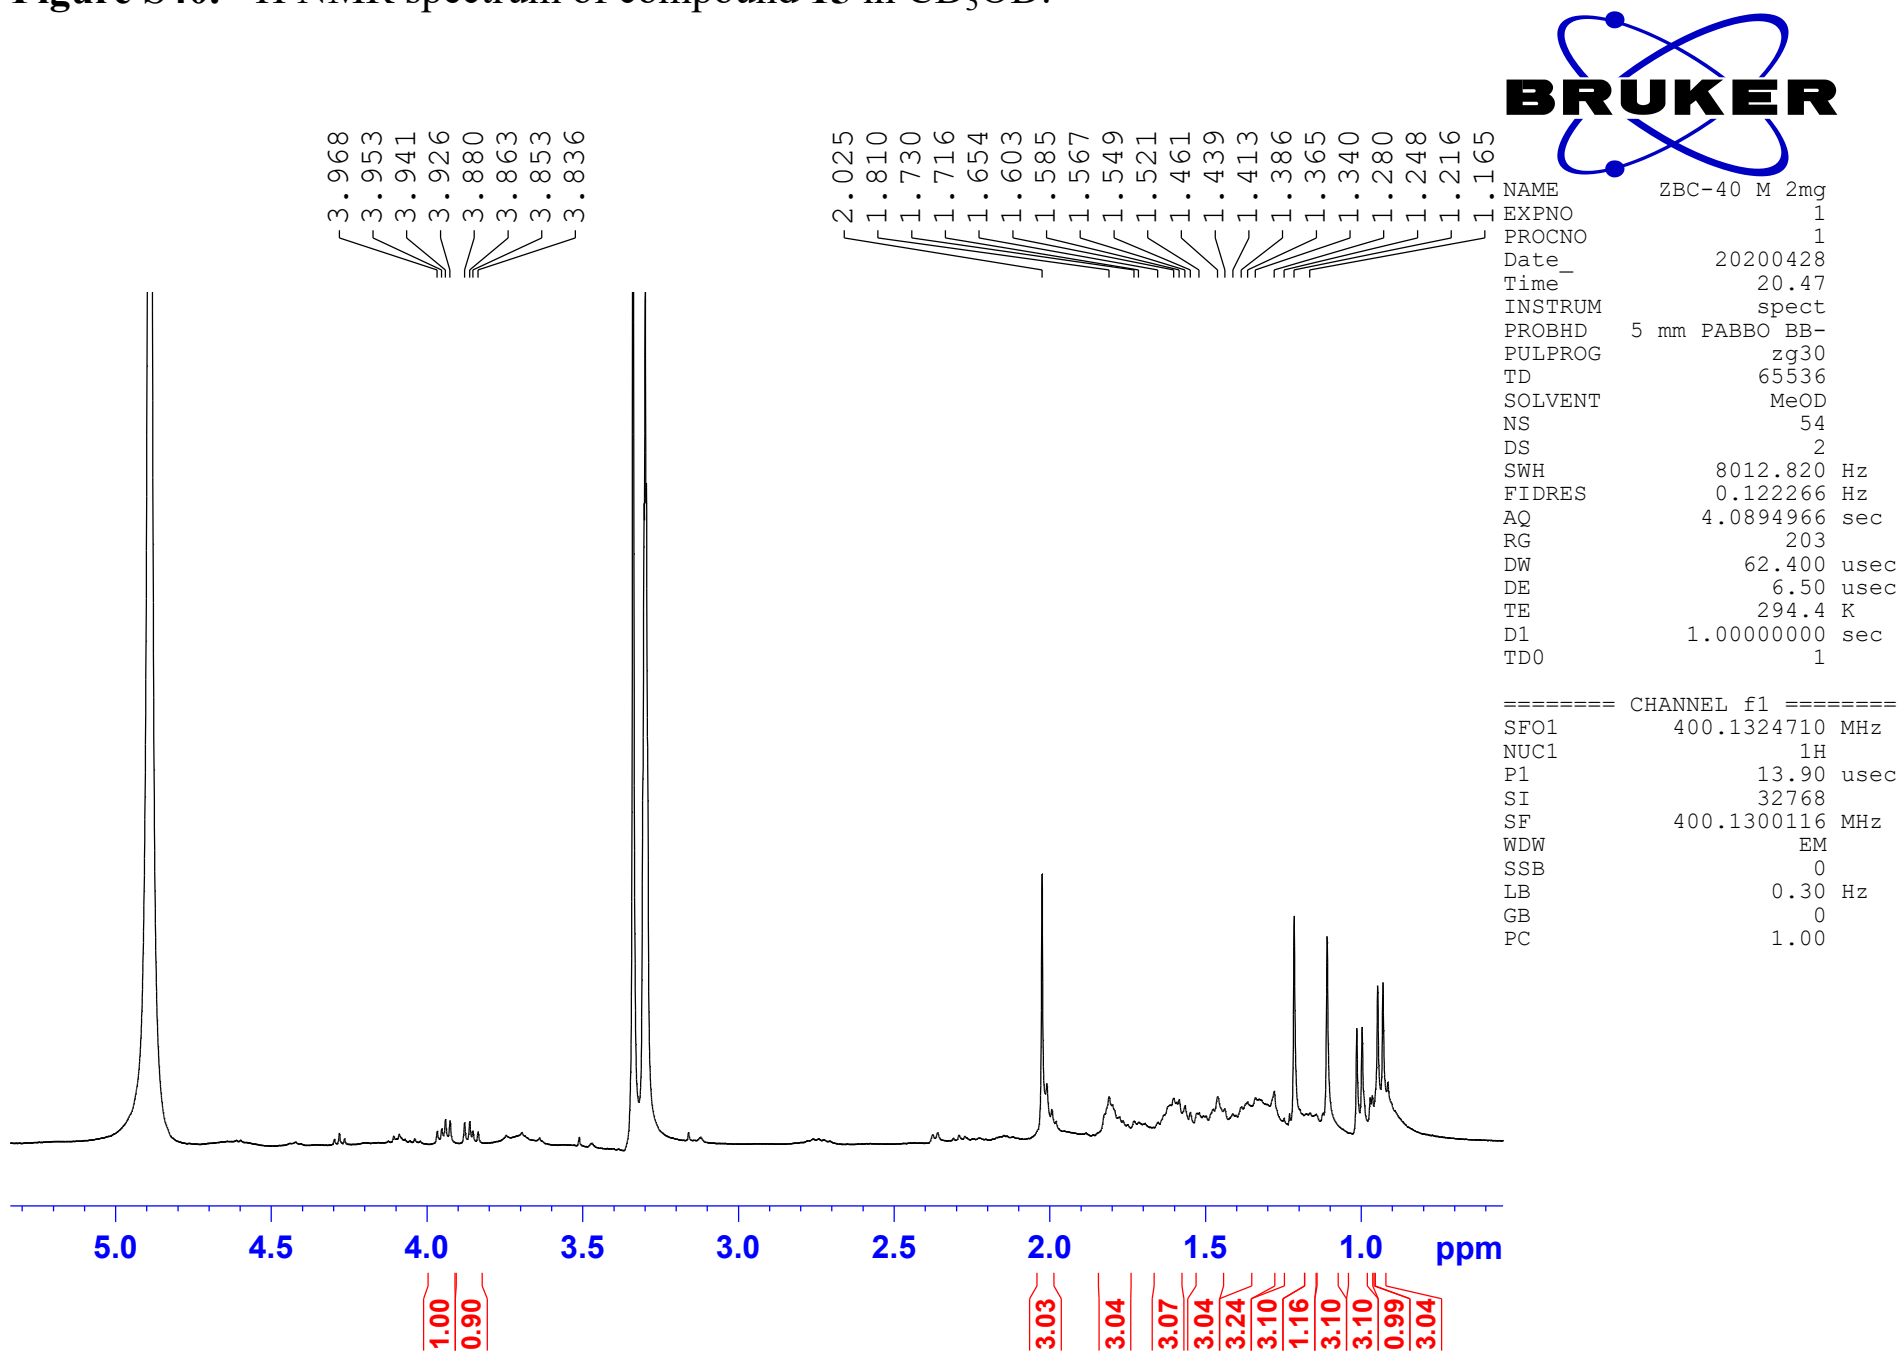

**Figure S41.**  $^1\text{H}$  NMR spectrum of compound **16** in  $\text{CD}_3\text{OD}$ .

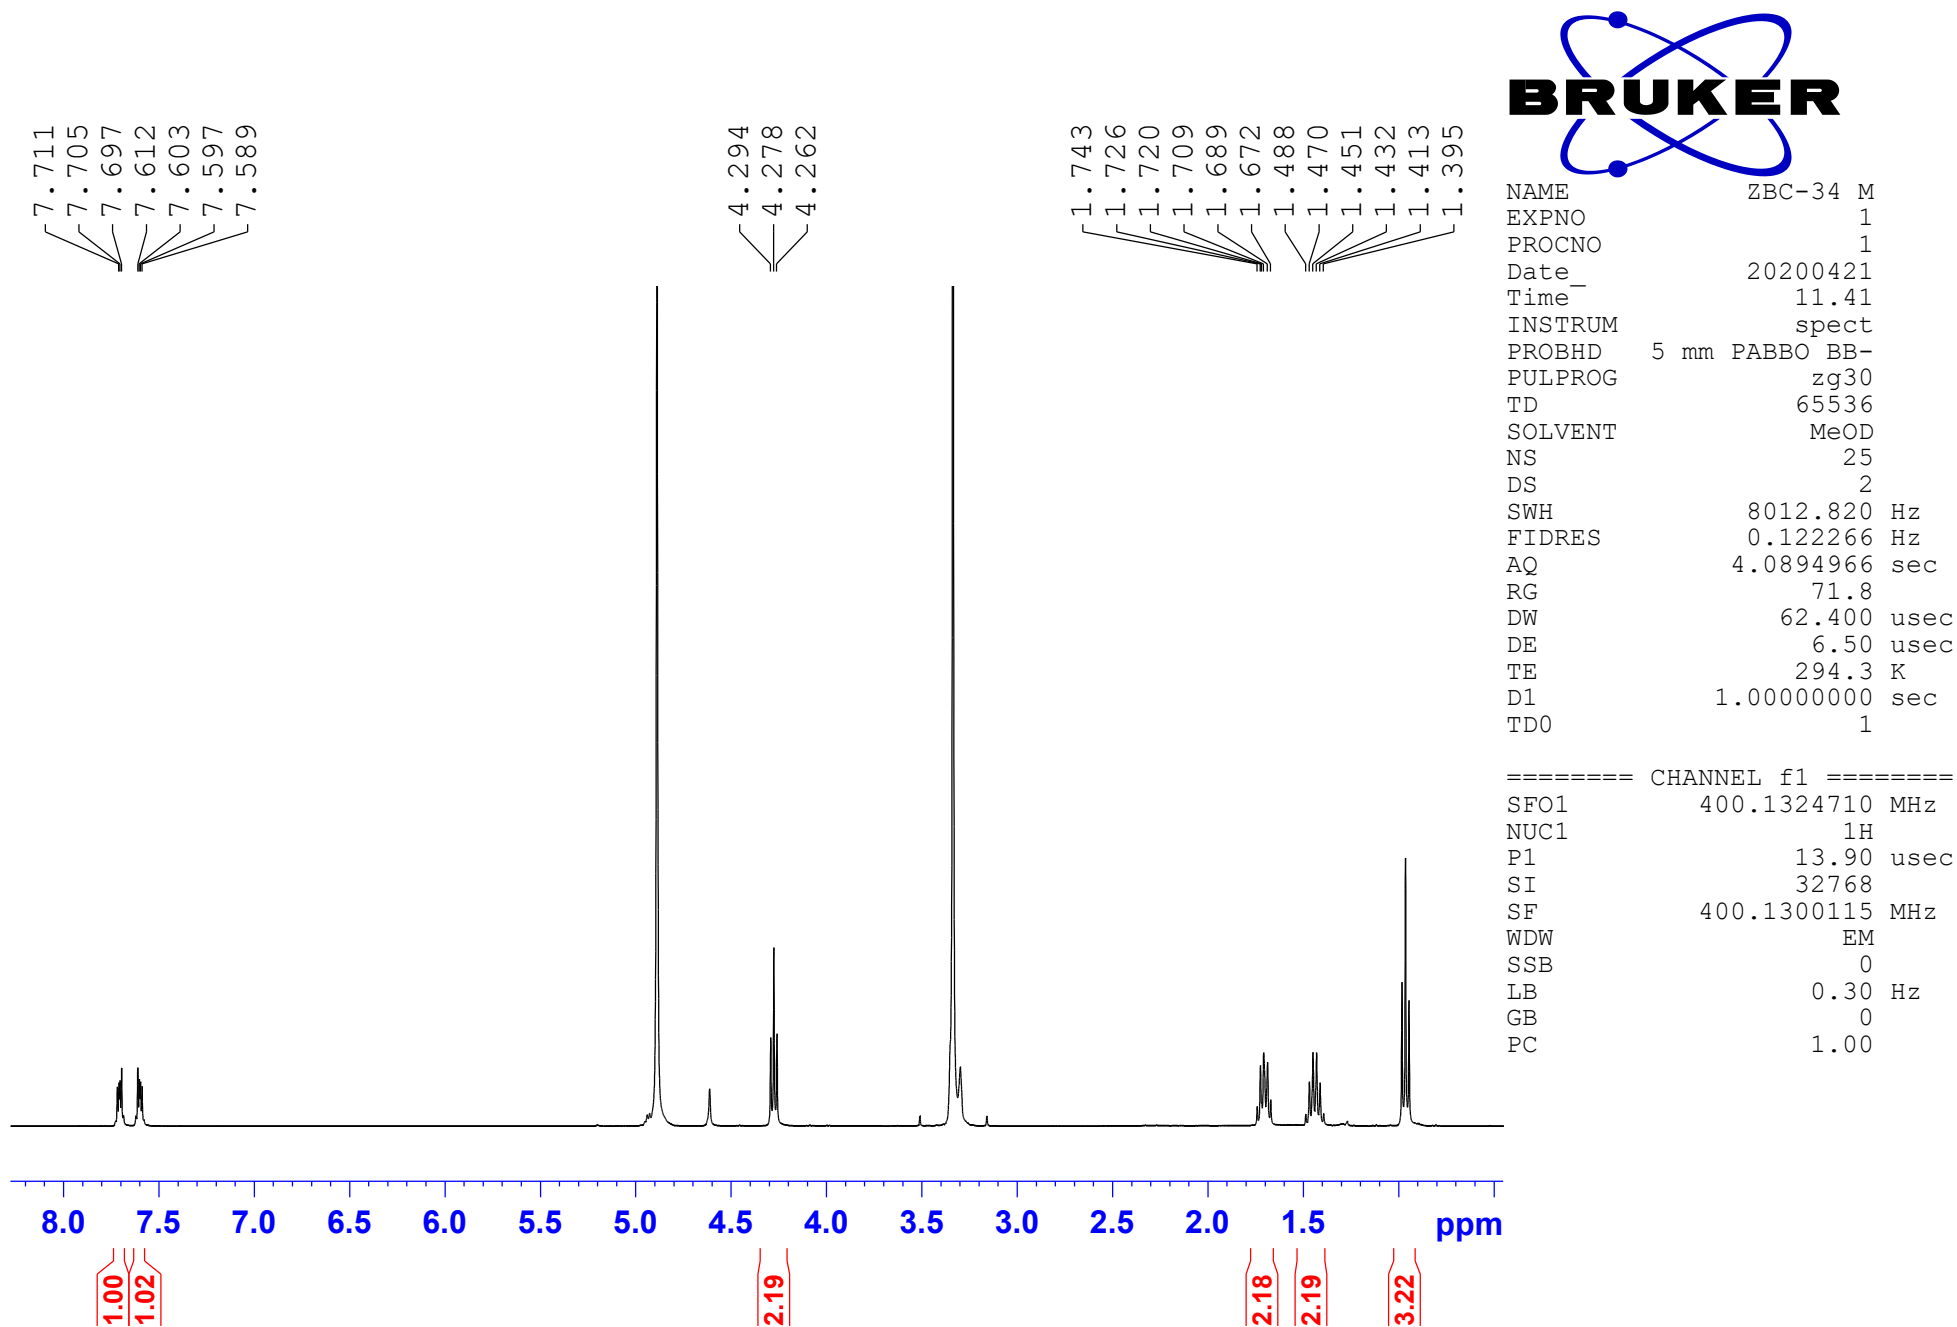



**Figure S42.**  $^1\text{H}$  NMR spectrum of compound **17** in  $\text{CD}_3\text{OD}$ .

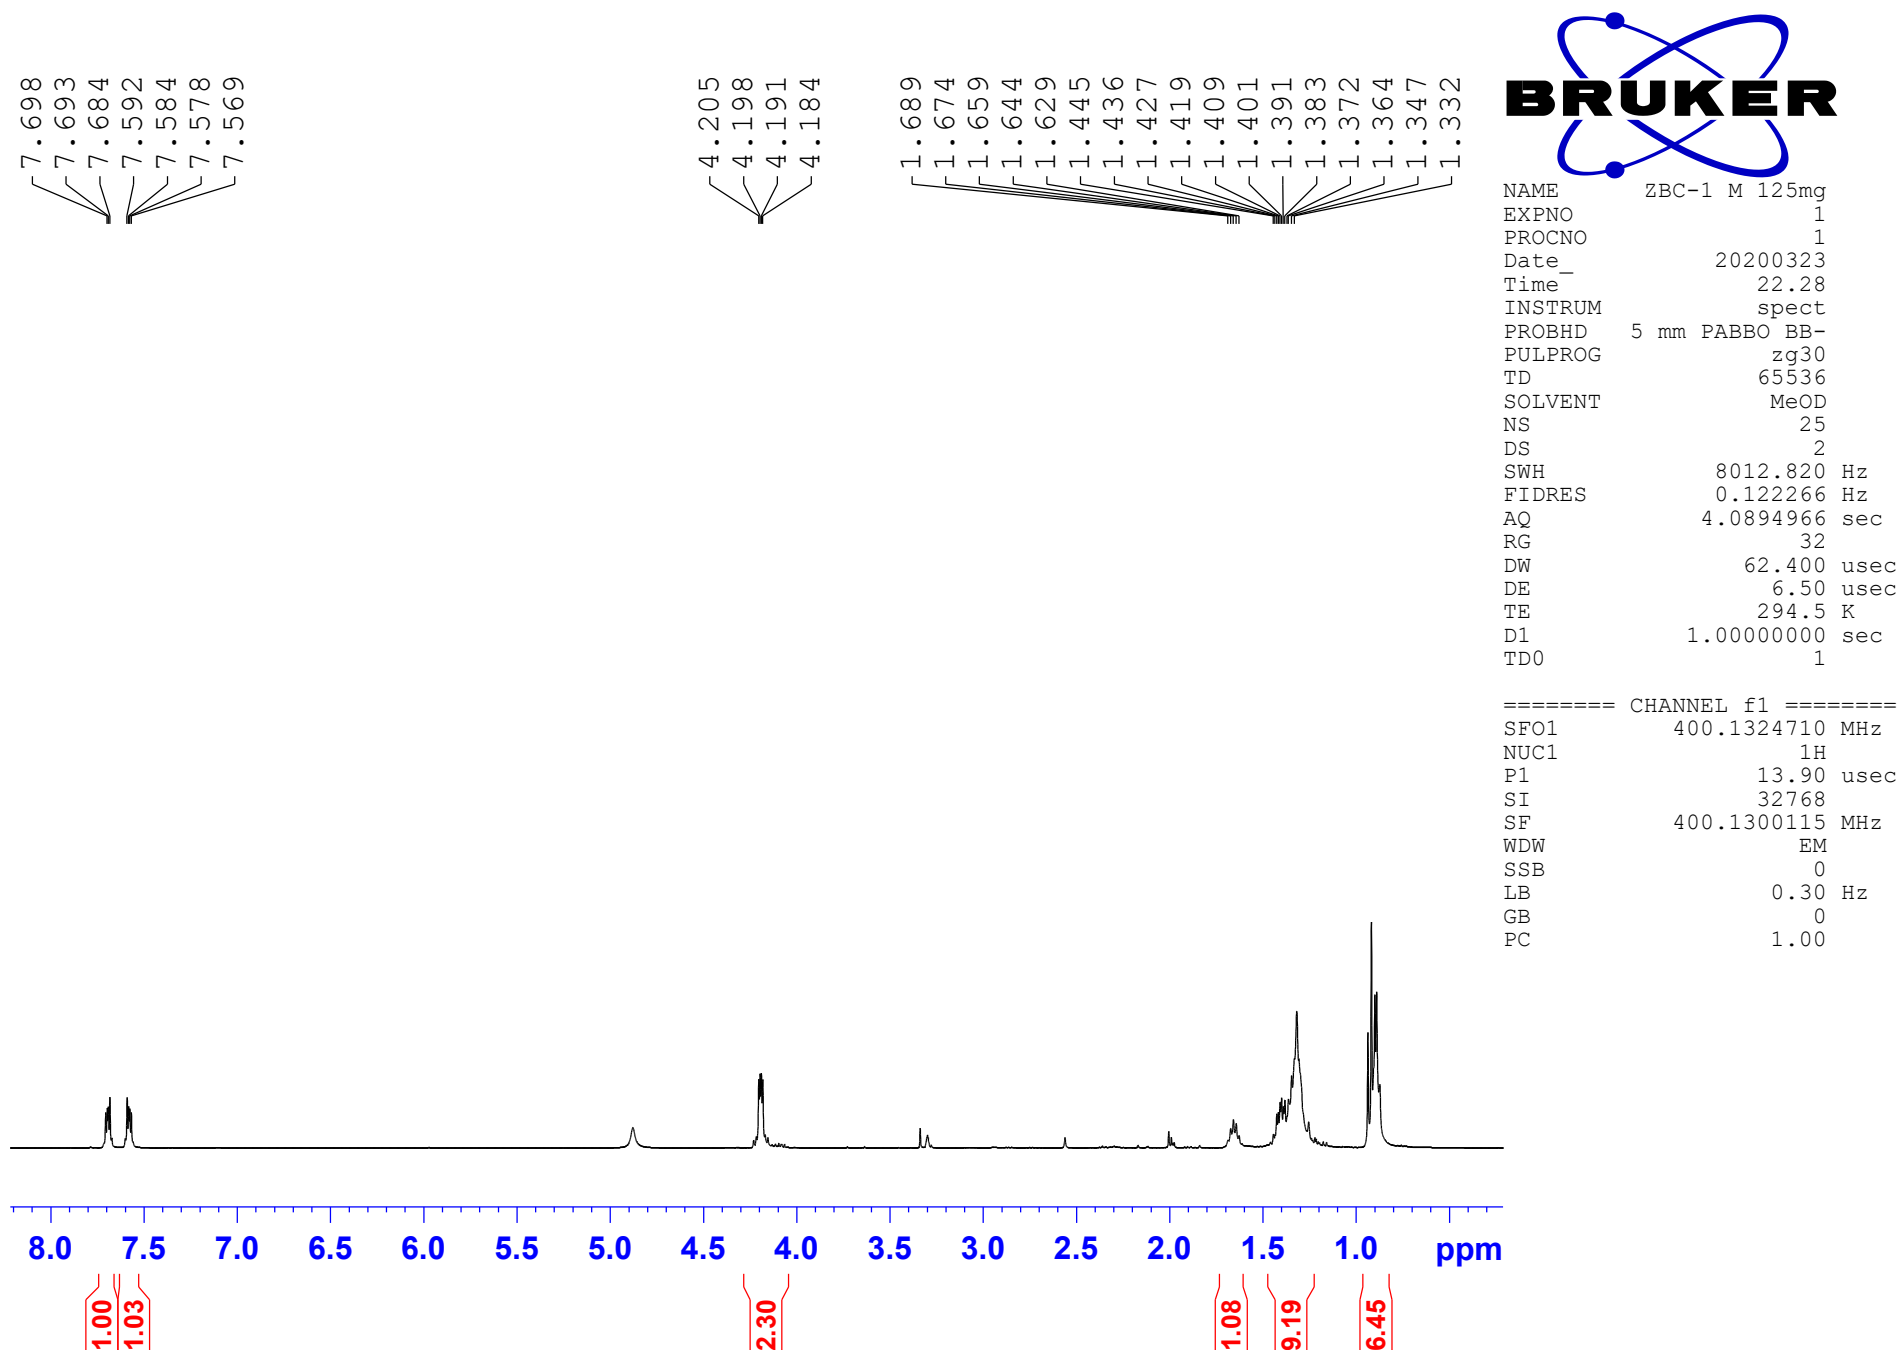

**Figure S43.**  $^1\text{H}$  NMR spectrum of compound **18** in  $\text{CD}_3\text{OD}$ .

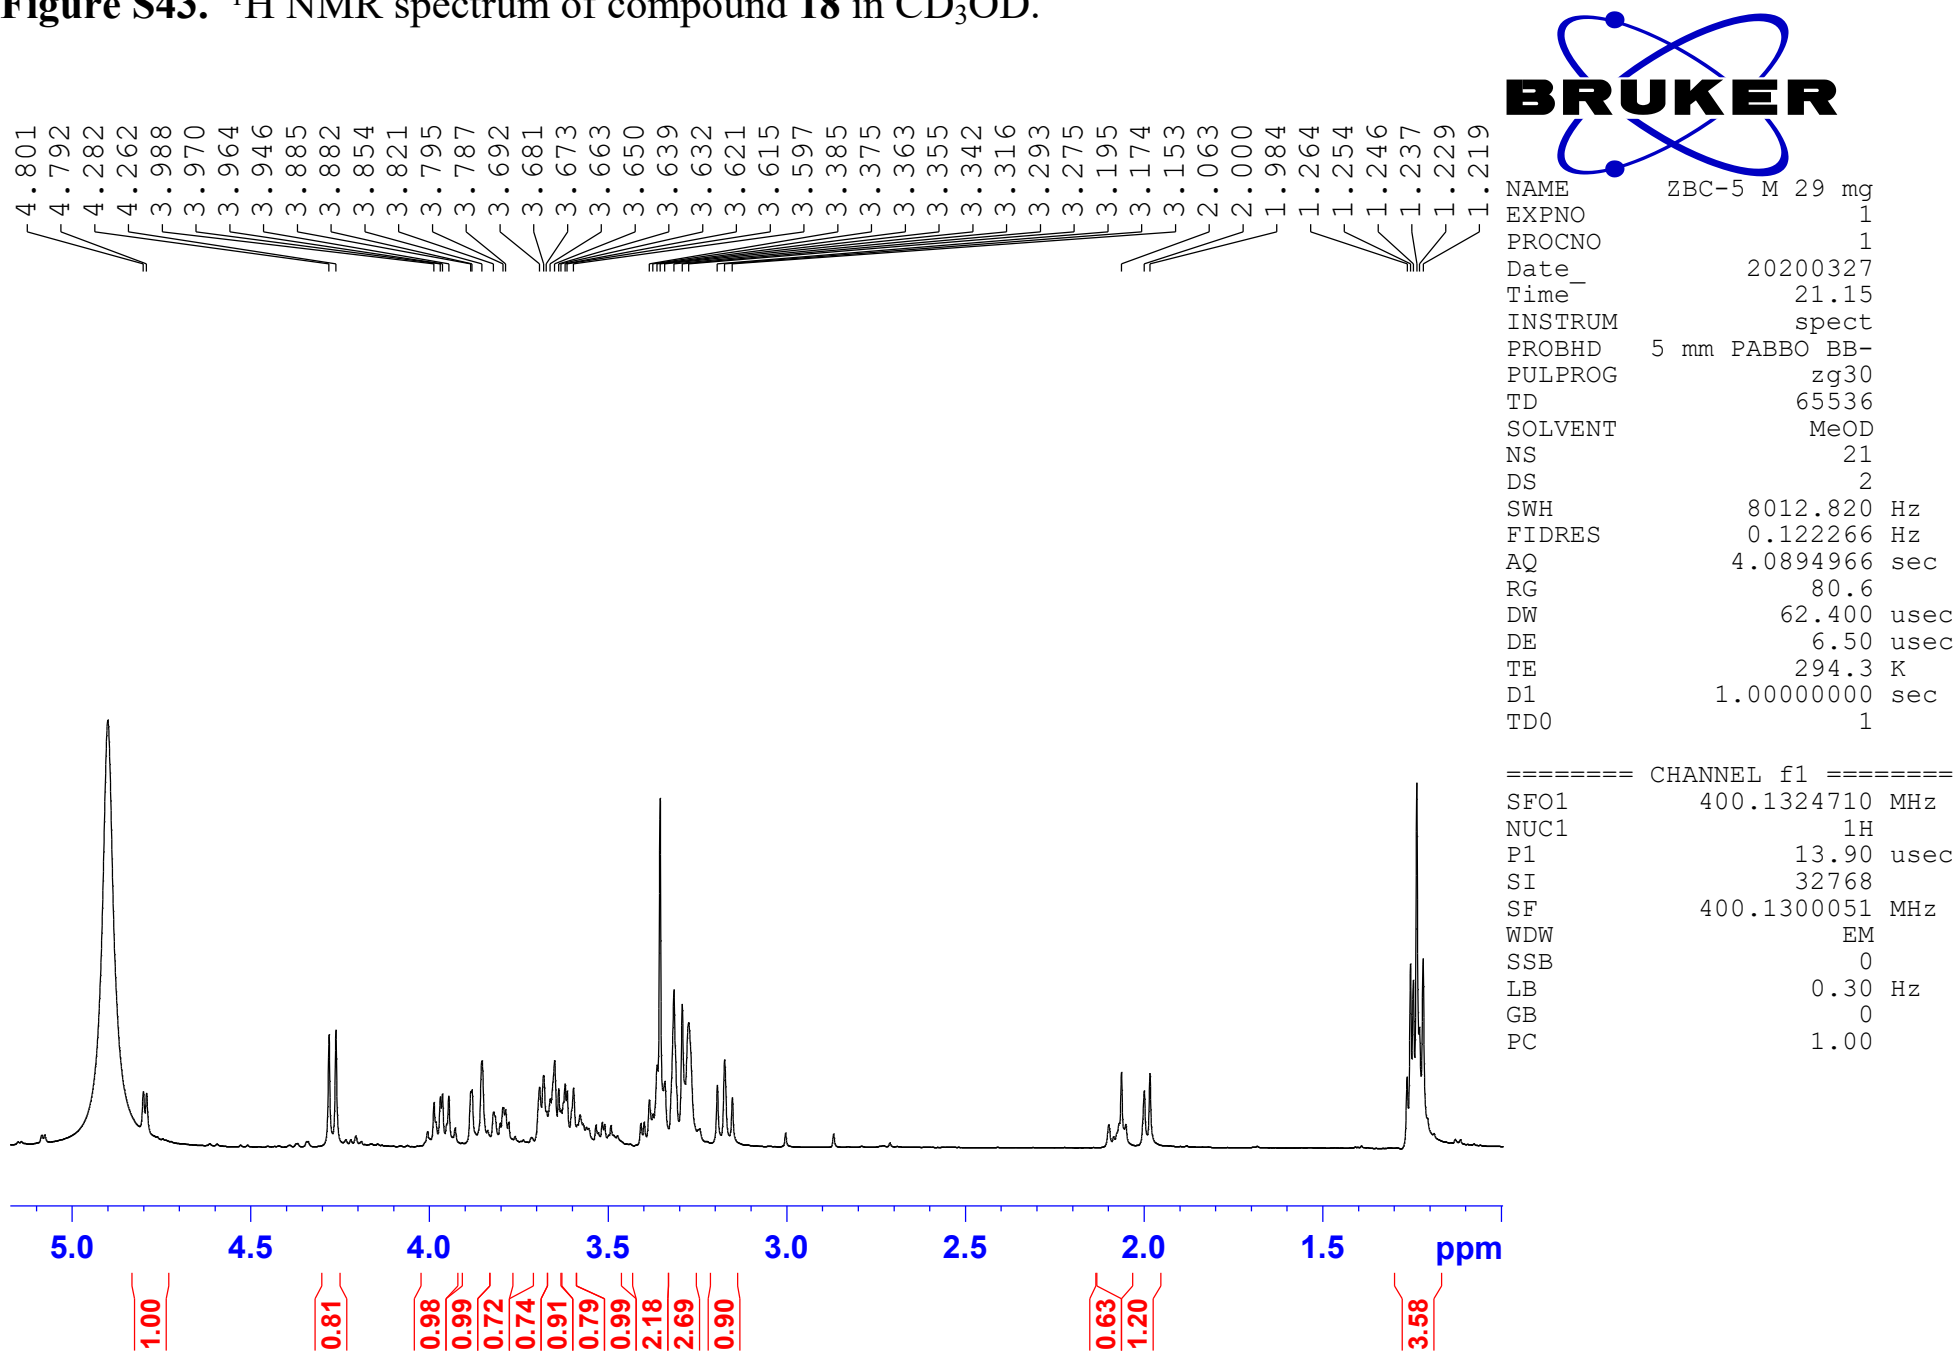

**Figure S44.**  $^1\text{H}$  NMR spectrum of compound **19** in  $\text{CD}_3\text{OD}$ .

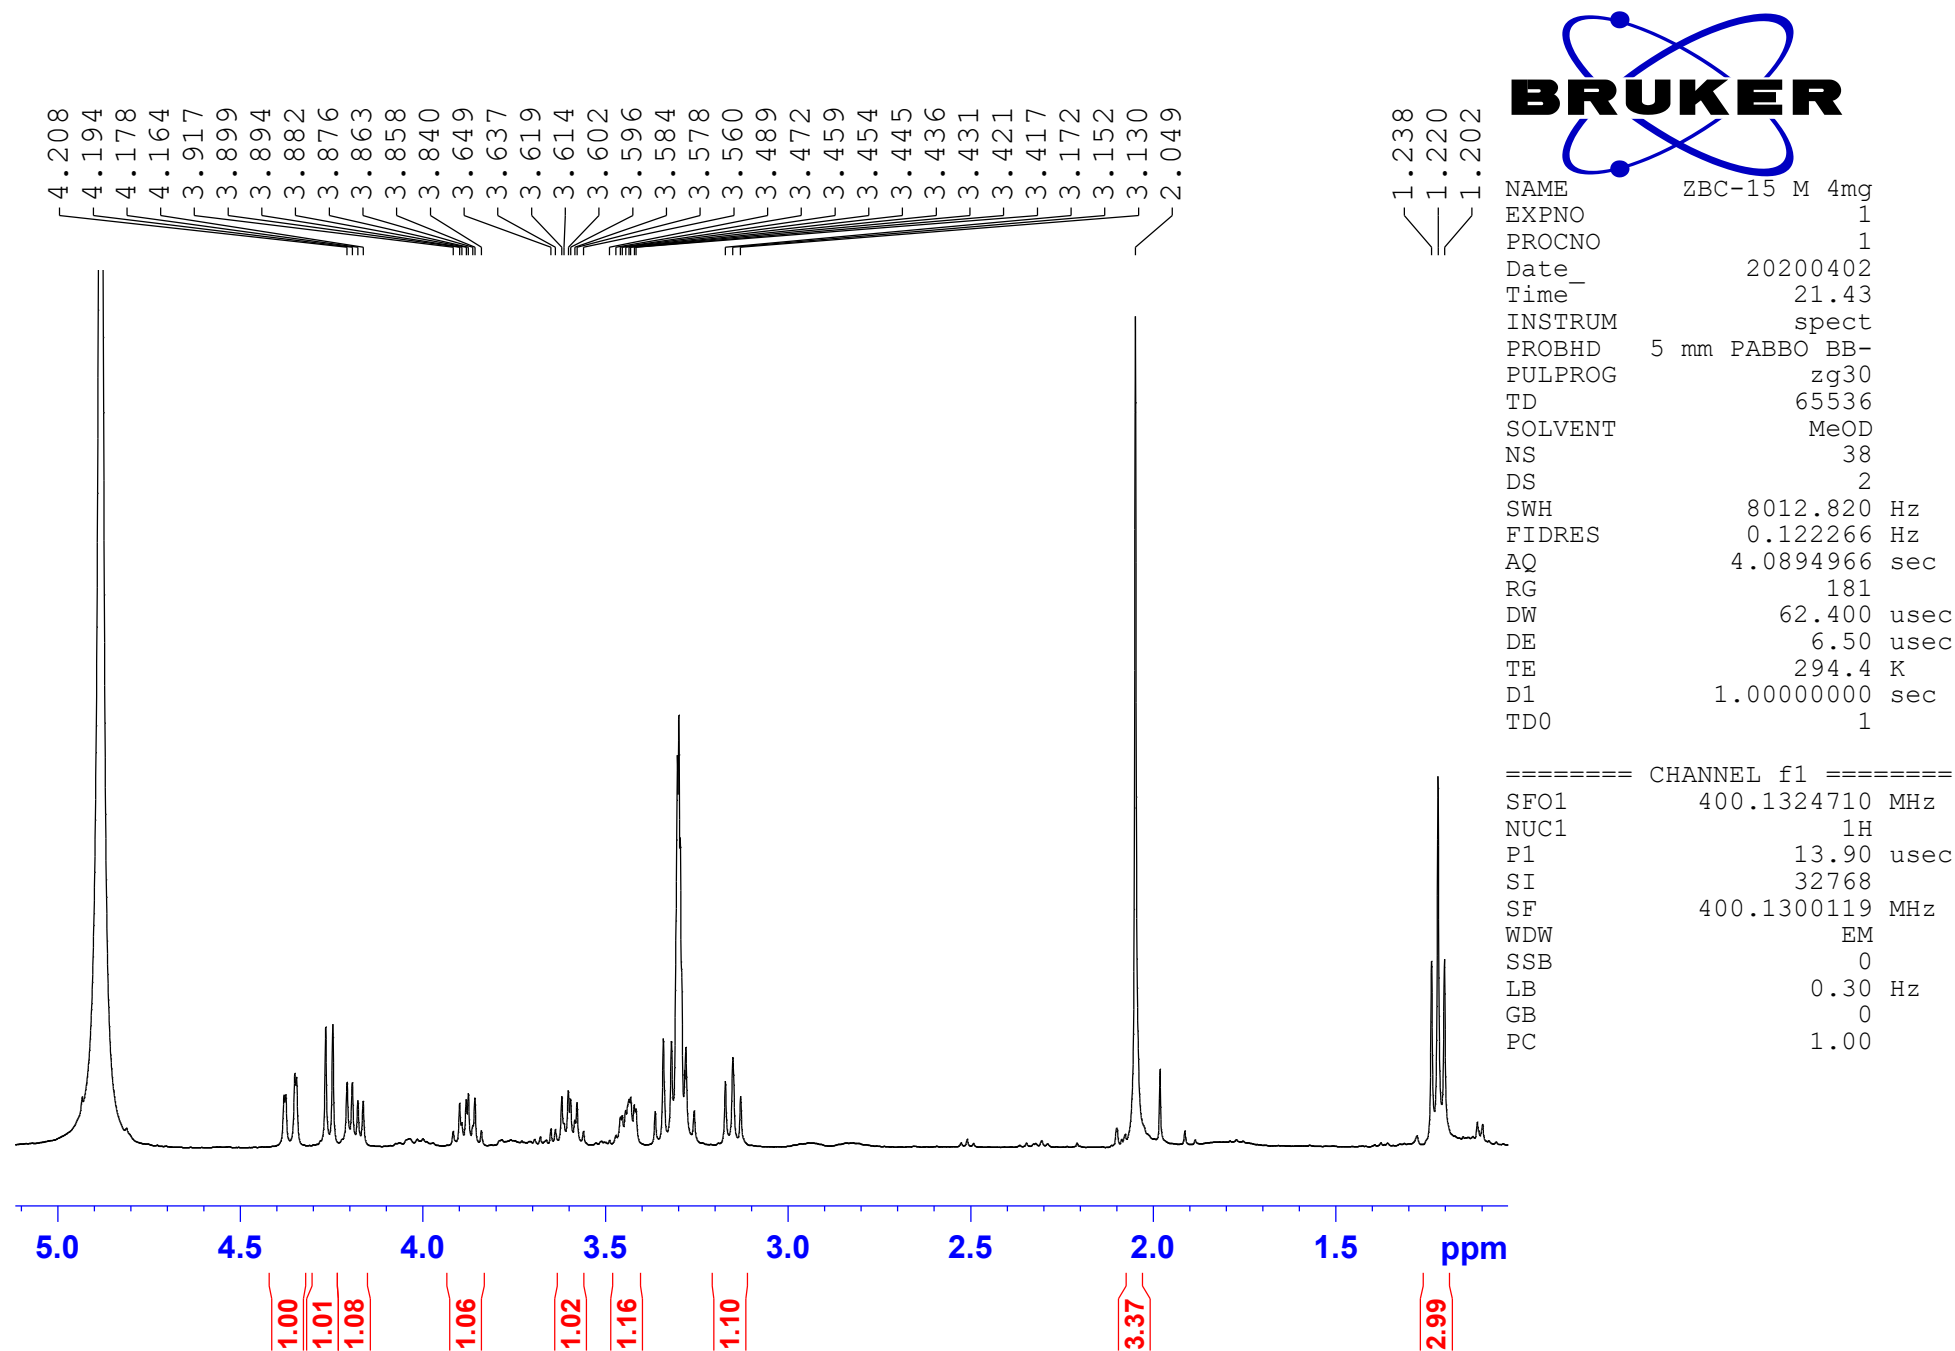

**Figure S45.**  $^1\text{H}$  NMR spectrum of compound **20** in  $\text{CD}_3\text{OD}$ .

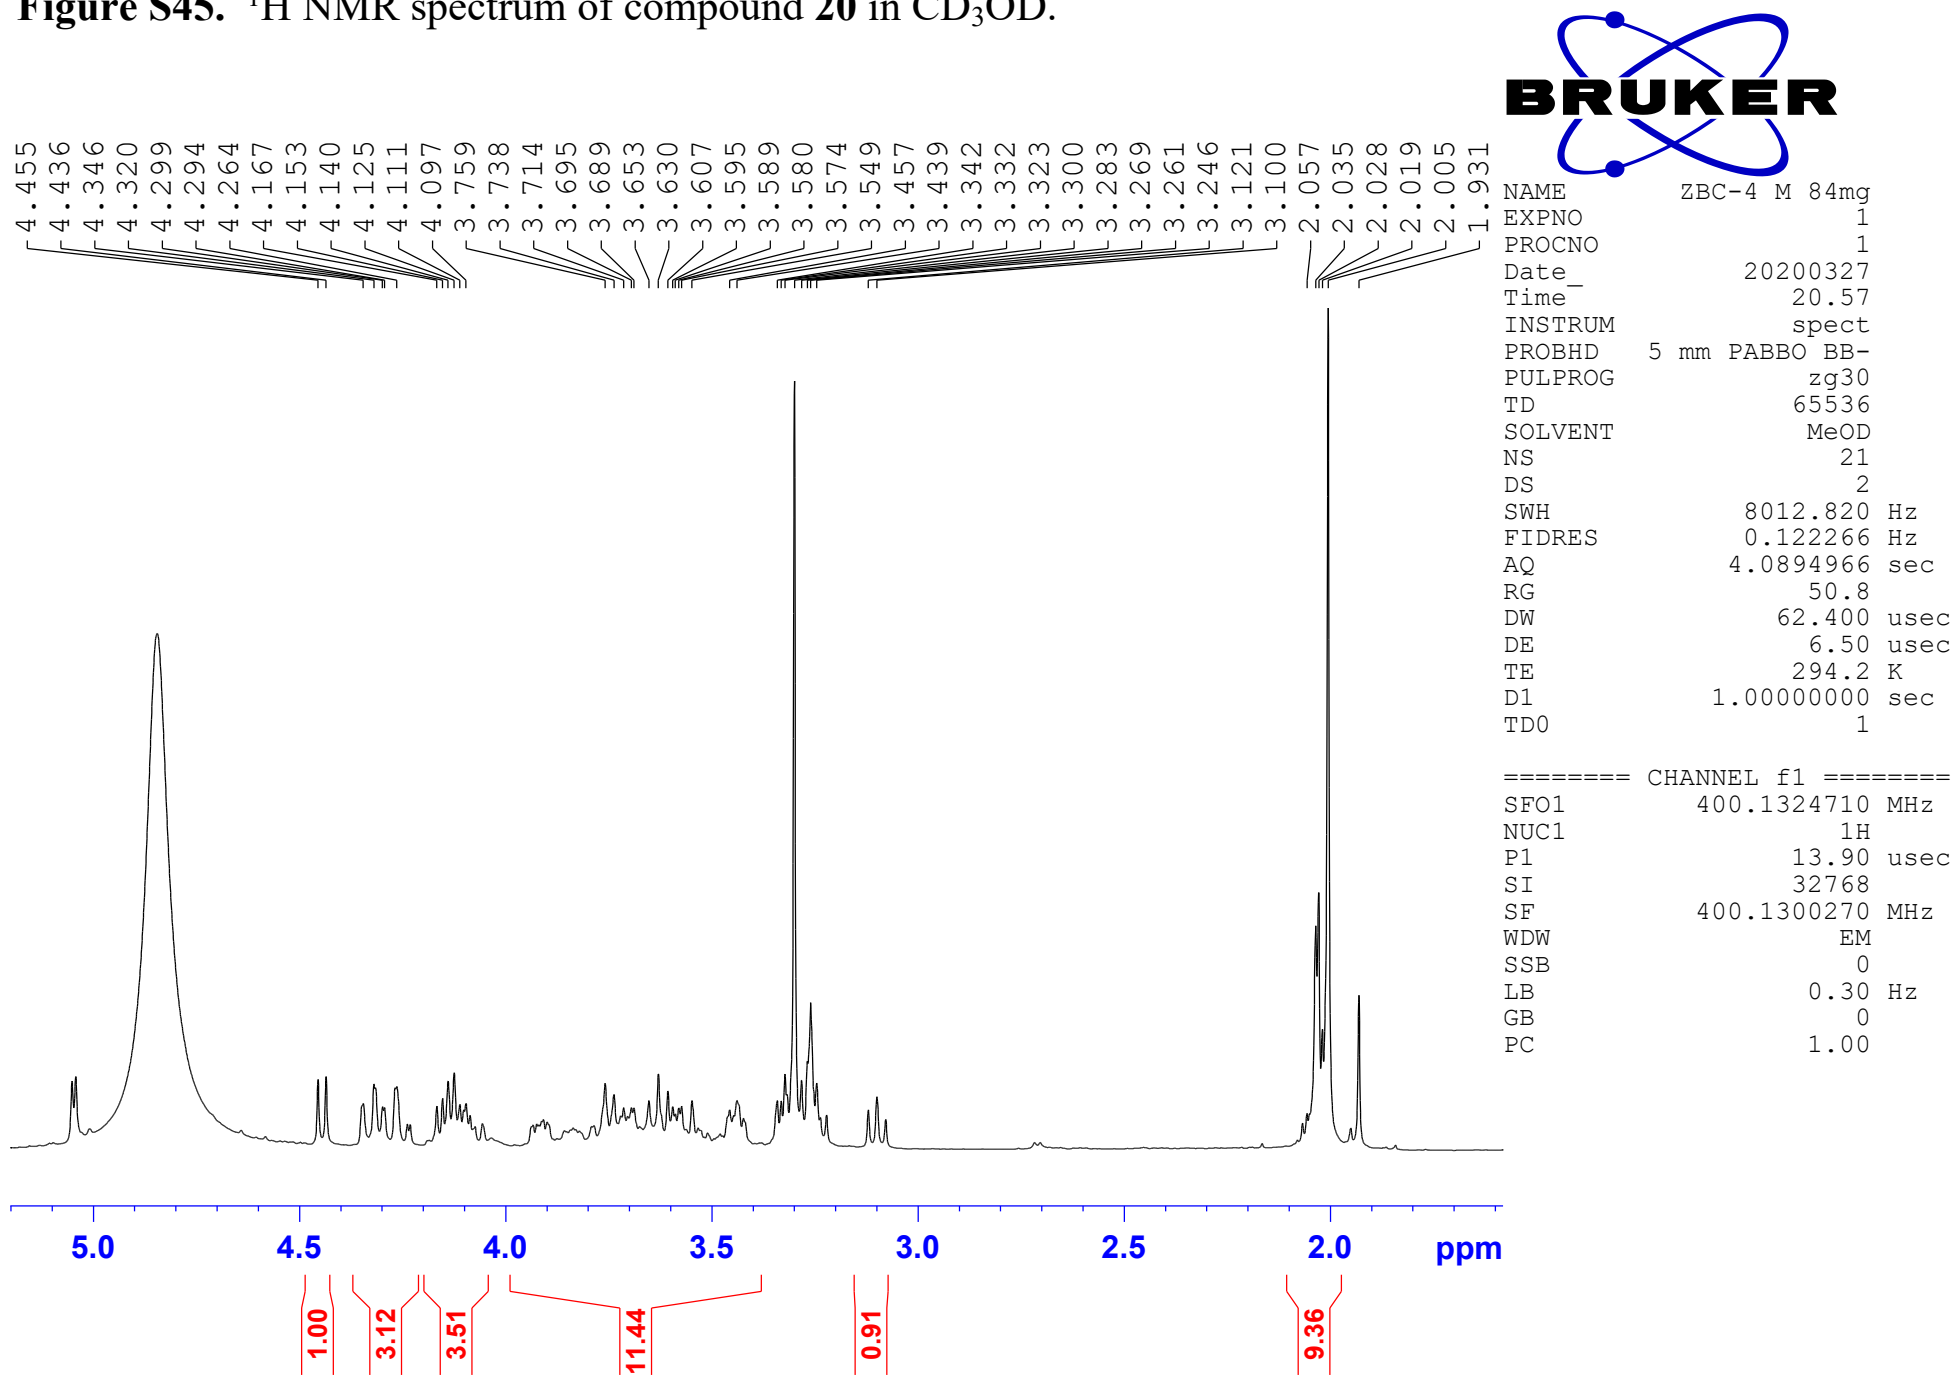

**Figure S46.**  $^1\text{H}$  NMR spectrum of compound **21** in  $\text{CD}_3\text{OD}$ .

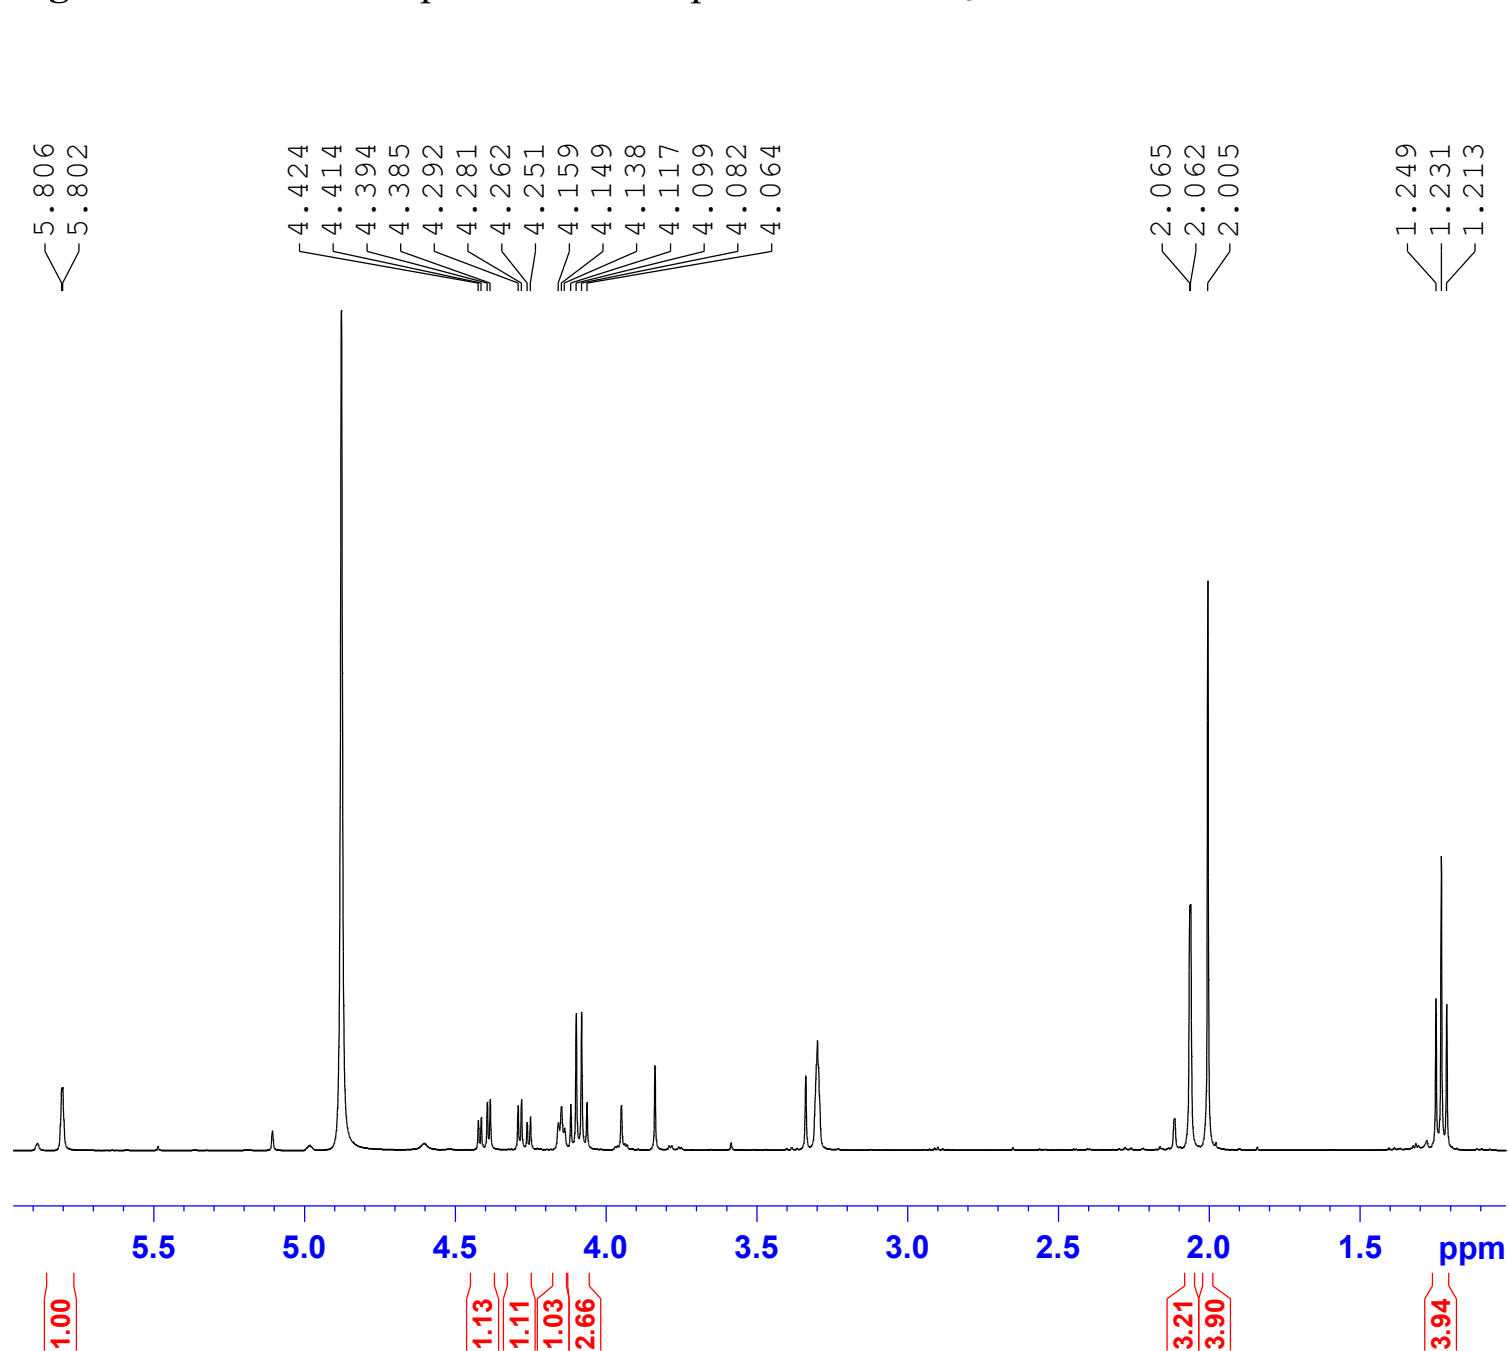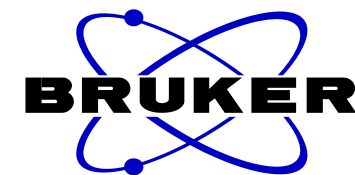

```

NAME      ZBC-45 M 2mg
EXPNO     1
PROCNO    1
Date_     20200430
Time      17.45
INSTRUM   spect
PROBHD    5 mm PABBO BB-
PULPROG   zg30
TD        65536
SOLVENT   MeOD
NS         33
DS         2
SWH        8012.820 Hz
FIDRES     0.122266 Hz
AQ         4.0894966 sec
RG         161
DW         62.400 usec
DE         6.50 usec
TE         294.6 K
D1         1.00000000 sec
TD0        1

===== CHANNEL f1 =====
SFO1      400.1324710 MHz
NUC1       1H
P1         13.90 usec
SI         32768
SF         400.1300116 MHz
WDW        EM
SSB        0
LB         0.30 Hz
GB         0
PC         1.00
    
```

**Figure S47.**  $^1\text{H}$  NMR spectrum of compound **22** in  $\text{CD}_3\text{OD}$ .

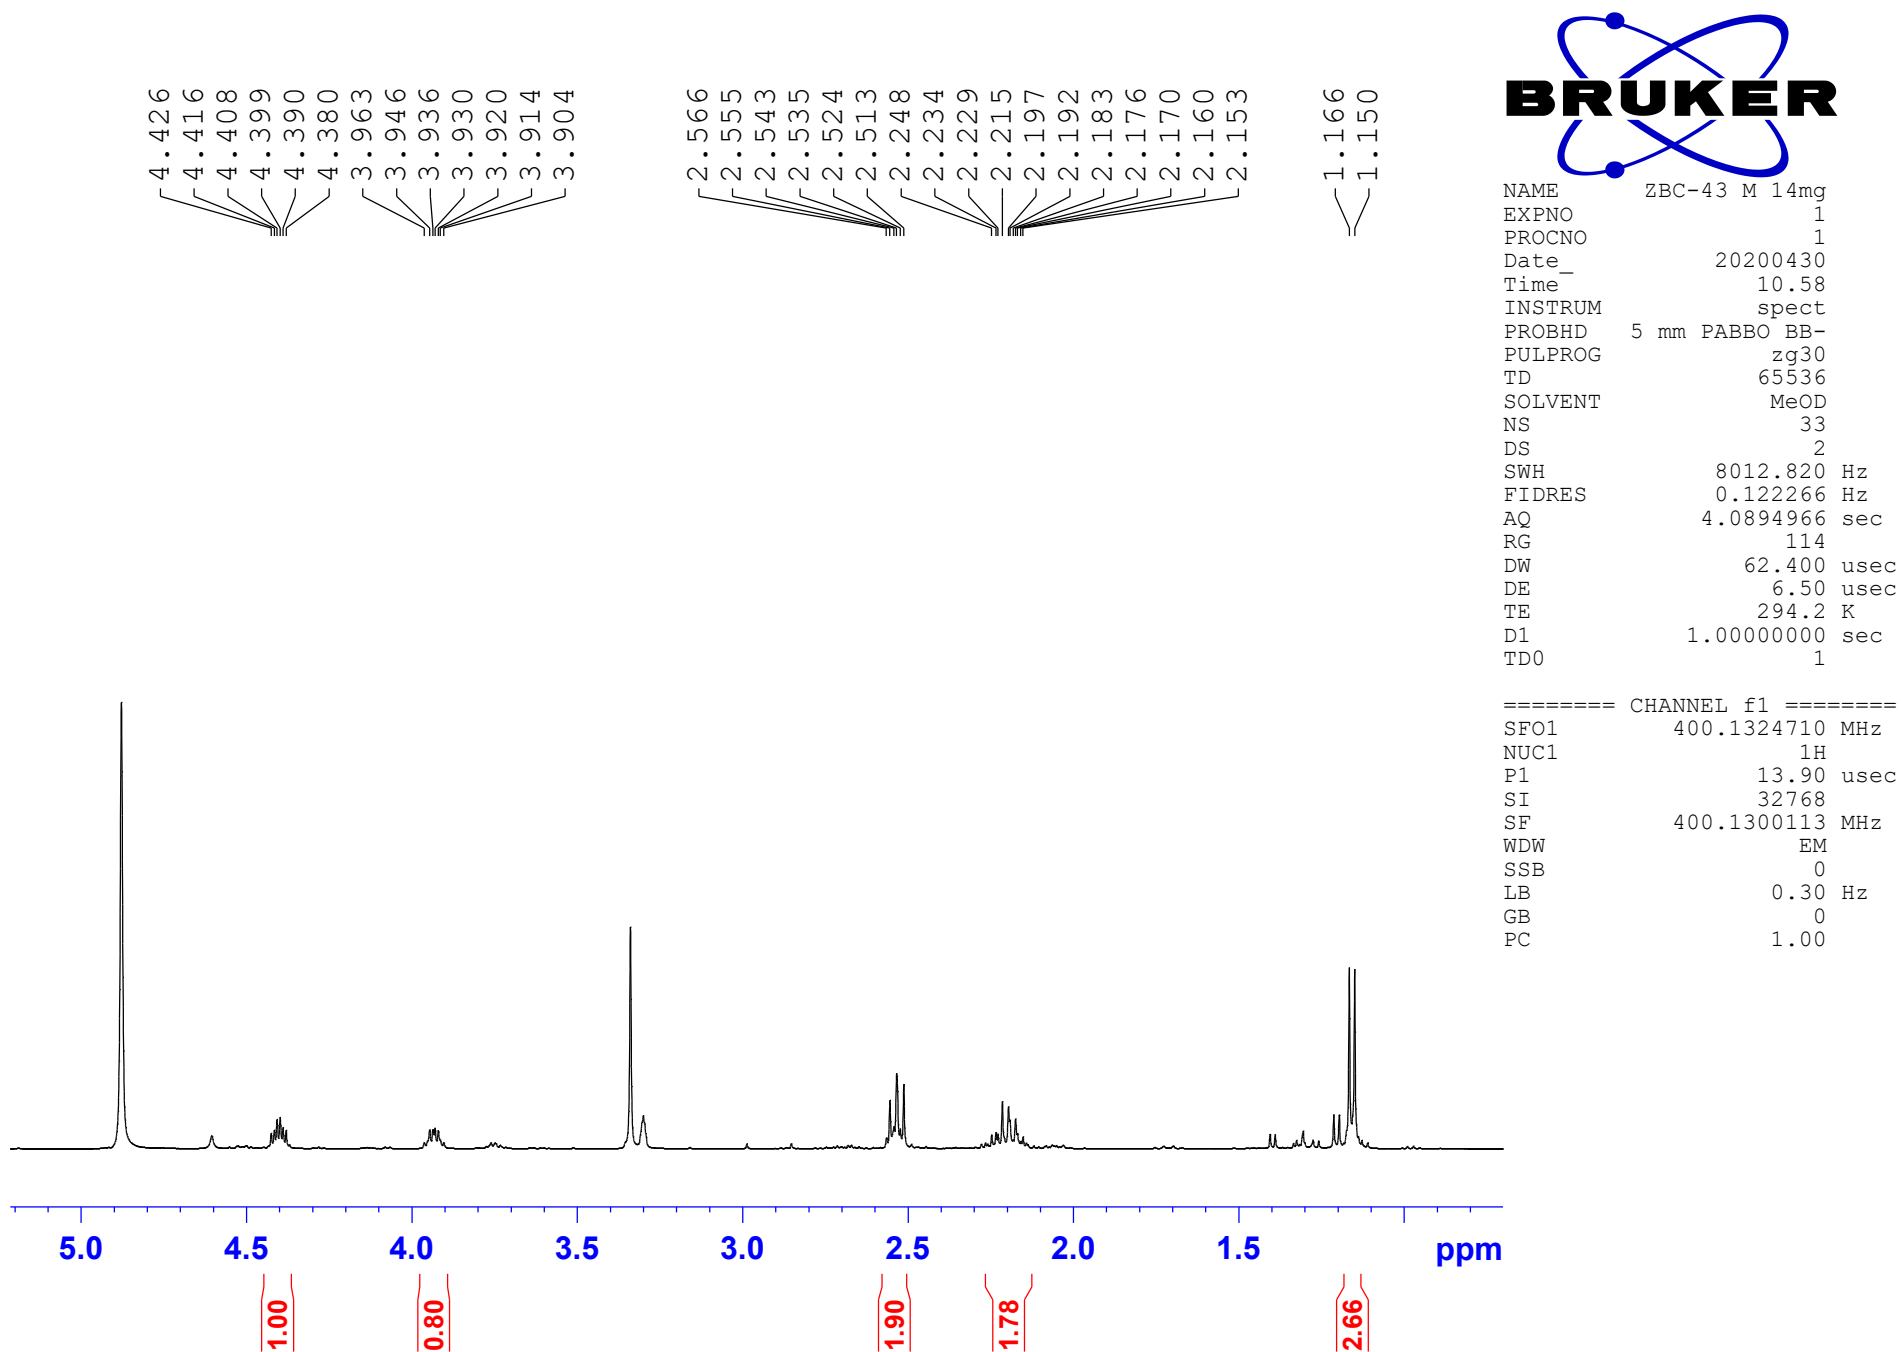

**Figure S48.** Gibbs free energy and equilibrium populations of low-energy conformers of **1** in ECD calculations.

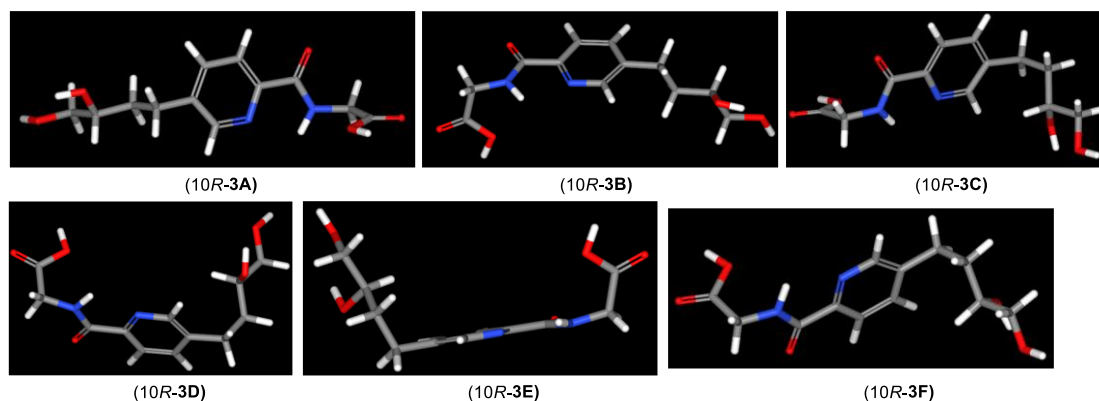

| Conformers     | Energy<br>(Hartree) | Energy<br>(kcal/mol) | Population<br>(%) | Theory level      | Solvent  |
|----------------|---------------------|----------------------|-------------------|-------------------|----------|
| <b>10R -3A</b> | -952.8454           | -597919.54           | 20.4              | B3LYP/6-311G(d,p) | Methanol |
| <b>10R -3B</b> | -952.8454           | -597919.52           | 19.8              | B3LYP/6-311G(d,p) | Methanol |
| <b>10R -3C</b> | -952.8451           | -597919.37           | 15.3              | B3LYP/6-311G(d,p) | Methanol |
| <b>10R -3D</b> | -952.8451           | -597919.37           | 15.3              | B3LYP/6-311G(d,p) | Methanol |
| <b>10R -3E</b> | -952.8451           | -597919.34           | 14.6              | B3LYP/6-311G(d,p) | Methanol |
| <b>10R -3F</b> | -952.8451           | -597919.34           | 14.6              | B3LYP/6-311G(d,p) | Methanol |

**Figure S49.** Gibbs free energy and equilibrium populations of low-energy conformers of **3** in ECD calculations.

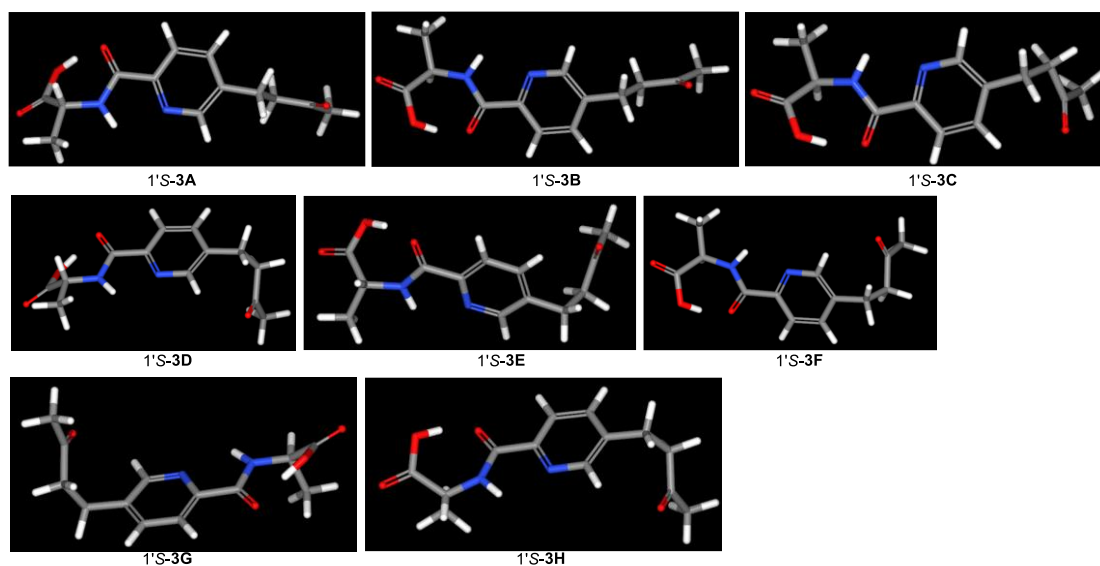

| Conformers     | Energy<br>(Hartree) | Energy<br>(kcal/mol) | Population<br>(%) | Theory level      | Solvent  |
|----------------|---------------------|----------------------|-------------------|-------------------|----------|
| <b>1'S-3A</b>  | -915.7345           | -574632.10           | 23.1              | B3LYP/6-311G(d,p) | Methanol |
| <b>1'S -3B</b> | -915.7345           | -574632.07           | 22.0              | B3LYP/6-311G(d,p) | Methanol |
| <b>1'S -3C</b> | -915.7340           | -574631.78           | 13.5              | B3LYP/6-311G(d,p) | Methanol |
| <b>1'S -3D</b> | -915.7340           | -574631.77           | 13.3              | B3LYP/6-311G(d,p) | Methanol |
| <b>1'S -3E</b> | -915.73397          | -574631.74           | 12.6              | B3LYP/6-311G(d,p) | Methanol |
| <b>1'S -3F</b> | -915.7339           | -574631.74           | 12.6              | B3LYP/6-311G(d,p) | Methanol |
| <b>1'S -3G</b> | -915.7319           | -574630.48           | 1.5               | B3LYP/6-311G(d,p) | Methanol |
| <b>1'S -3H</b> | -915.7319           | -574630.46           | 1.4               | B3LYP/6-311G(d,p) | Methanol |



**Figure S50.** Gibbs free energy and equilibrium populations of low-energy conformers of **4** in ECD calculations.

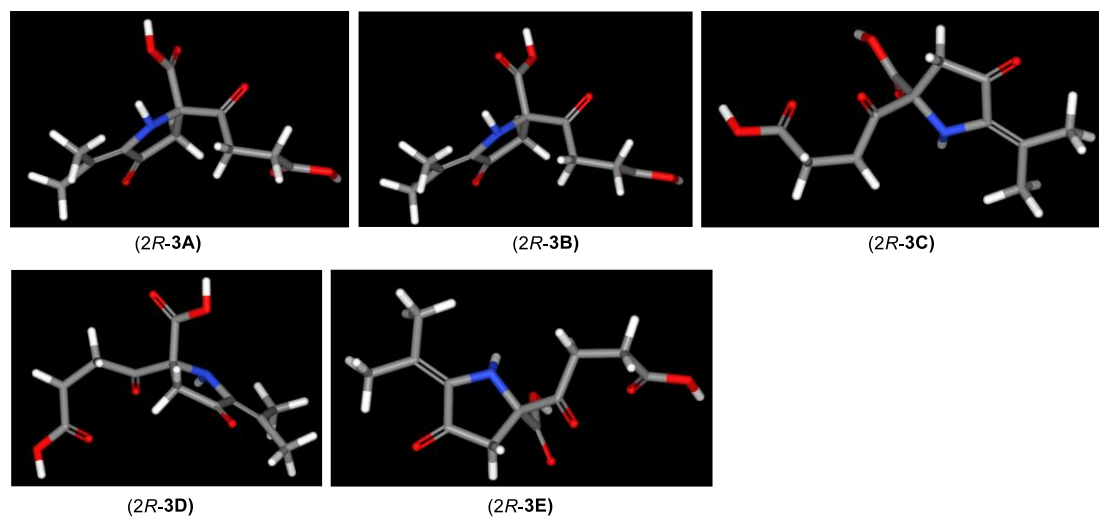

| Conformers   | Energy<br>(Hartree) | Energy<br>(kcal/mol) | Population<br>(%) | Theory level      | Solvent  |
|--------------|---------------------|----------------------|-------------------|-------------------|----------|
| <b>2R-3A</b> | -972.7126           | -610386.38           | 33.2              | B3LYP/6-311G(d,p) | Methanol |
| <b>2R-3B</b> | -972.7123           | -610386.19           | 24.1              | B3LYP/6-311G(d,p) | Methanol |
| <b>2R-3C</b> | -972.7123           | -610386.19           | 24.1              | B3LYP/6-311G(d,p) | Methanol |
| <b>2R-3D</b> | -972.7119           | -610385.97           | 16.6              | B3LYP/6-311G(d,p) | Methanol |
| <b>2R-3E</b> | -972.7096           | -610384.50           | 1.4               | B3LYP/6-311G(d,p) | Methanol |

**Figure S51.** UV spectrum of compounds **1-4**.

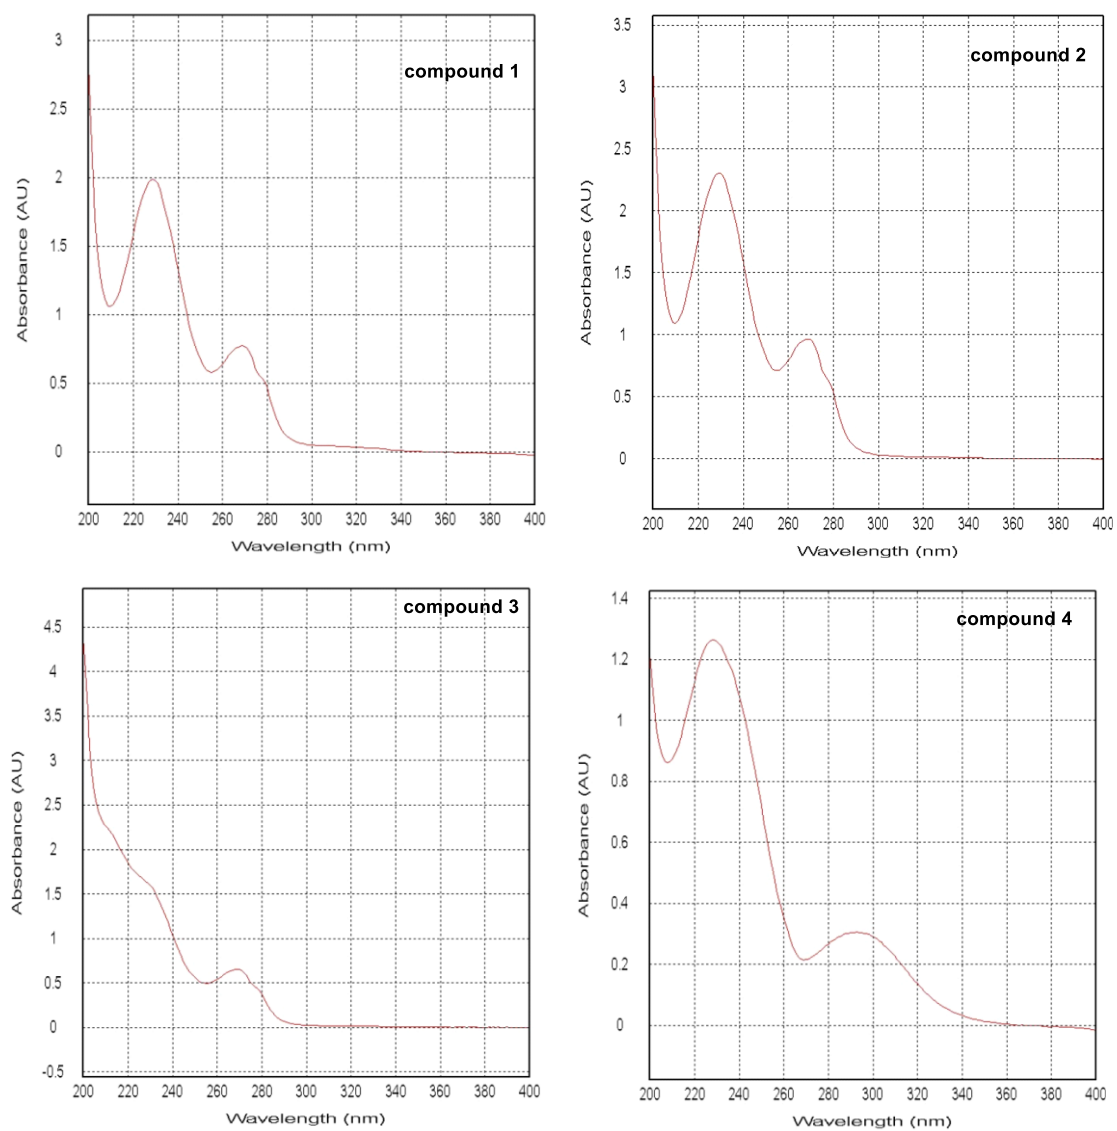

**Figure S52.** Inhibitory effects of compounds **1–22** (1  $\mu$ M) on LPS-induced nitrite production in BV-2.

| <b>NO.</b> | <b>inhibition rate(1uM)</b> | <b>NO.</b> | <b>inhibition rate(1uM)</b> |
|------------|-----------------------------|------------|-----------------------------|
| V          | 100 $\pm$ 1.6               | <b>11</b>  | 30.7 $\pm$ 4.8              |
| LPS        | 0 $\pm$ 1.6                 | <b>12</b>  | 12.0 $\pm$ 1.0              |
| <b>1</b>   | 6.7 $\pm$ 2.6               | <b>13</b>  | 32.9 $\pm$ 1.6              |
| <b>2</b>   | 0.8 $\pm$ 0.9               | <b>14</b>  | 21.5 $\pm$ 3.0              |
| <b>3</b>   | 28.8 $\pm$ 1.9              | <b>15</b>  | 20.6 $\pm$ 2.2              |
| <b>4</b>   | 10.8 $\pm$ 5.9              | <b>16</b>  | 22.2 $\pm$ 2.3              |
| <b>5</b>   | 16.8 $\pm$ 2.6              | <b>17</b>  | 0 $\pm$ 1.9                 |
| <b>6</b>   | 15.8 $\pm$ 3.3              | <b>18</b>  | 15.5 $\pm$ 2.8              |
| <b>7</b>   | -1.9 $\pm$ 1.0              | <b>19</b>  | 26.9 $\pm$ 3.2              |
| <b>8</b>   | 34.2 $\pm$ 1.6              | <b>20</b>  | -1.0 $\pm$ 1.2              |
| <b>9</b>   | 7.9 $\pm$ 2.6               | <b>21</b>  | 38.6 $\pm$ 2.1              |
| <b>10</b>  | 14.2 $\pm$ 2.6              | <b>22</b>  | 58.2 $\pm$ 2.6              |
